# Supplementary material for: Matched Analyses of Brain Metastases versus Primary Non-Small Cell Lung Cancer Reveal a Unique microRNA Signature
Source: MDPI journal article supplement (doi:10.3390/ijms24010193), 2022-12-22
Supplement: s1 [file s1]

**Figure S1:** Differential miRNA expression in paired NSCLC tumors versus brain metastatic lesions;

**Table S1:** Differentially expressed miRNAs in primary NSCLC tumors versus brain metastatic lesions;

**Table S2:** Normalized counts and statistical analysis of differential miRNA expression in paired NSCLC tumors versus brain metastatic lesions;

**Table S3:** Target gene ranking of differentially expressed miRNAs ranked on their cumulative context score;

**Table S4:** Significantly altered pathways of target genes from all differentially expressed miRNAs;

**Table S5:** Interactions between differentially expressed miRNAs and core hub target genes in published literature.
