# Supplementary material for: Matched Analyses of Brain Metastases versus Primary Non-Small Cell Lung Cancer Reveal a Unique microRNA Signature
Source: Int J Mol Sci. 2022 Dec 22;24(1):193. doi: 10.3390/ijms24010193 (PMC9820685; doi:10.3390/ijms24010193)
Supplement: Supplementary file 1 [file ijms-24-00193-s001.zip]

Archive with 7 entries (7 files):
- captions.pdf
- Figure_S1.pdf
- Table S1.xlsx
- Table S2.xlsx
- Table S3.xlsx
- Table S4.xlsx
- Table S5.xlsx
