# Supplementary material for: Matched Analyses of Brain Metastases versus Primary Non-Small Cell Lung Cancer Reveal a Unique microRNA Signature
Source: Int J Mol Sci. 2022 Dec 22;24(1):193. doi: 10.3390/ijms24010193 (PMC9820685; doi:10.3390/ijms24010193)
Supplement: Supplementary file 1 [file ijms-24-00193-s001.zip › Table S1.xlsx]

## Sheet: Metastasis_vs_primary_miRNA.csv
Probe Name	Accession #	NS Probe ID	Class Name	Analyte Type	Metastasis vs. Primary (fold)	P value of: Metastasis vs. Primary	FDR adjusted pvalue of: Metastasis vs. Primary
hsa-miR-199a-5p	MIMAT0000231	nmiR03256.1:1	Endogenous1	miRNA	-5.83	2.6e-07	0
hsa-miR-199a-3p/b-3p	MIMAT0000232	nmiR03255.1:1	Endogenous1	miRNA	-5.76	1.86e-06	0
hsa-miR-199b-5p	MIMAT0000263	nmiR03257.1:1	Endogenous1	miRNA	-4.94	2e-06	0
hsa-miR-9-5p	MIMAT0000441	nmiR03124.1:1	Endogenous1	miRNA	5.68	3.18e-06	0
hsa-miR-129-2-3p	MIMAT0004605	nmiR03195.1:1	Endogenous1	miRNA	4.3	6.12e-06	0.01
hsa-miR-124-3p	MIMAT0000422	nmiR03188.1:1	Endogenous1	miRNA	3.82	8.29e-06	0.01
hsa-miR-219a-5p	MIMAT0000276	nmiR03280.1:1	Endogenous1	miRNA	3	9.1e-06	0.01
hsa-miR-150-5p	MIMAT0000451	nmiR03225.1:1	Endogenous1	miRNA	-4.98	1.294e-05	0.01
hsa-miR-142-3p	MIMAT0000434	nmiR03213.1:1	Endogenous1	miRNA	-5.28	2.234e-05	0.01
hsa-miR-219a-2-3p	MIMAT0004675	nmiR03279.1:1	Endogenous1	miRNA	3.18	3.038e-05	0.02
hsa-miR-143-3p	MIMAT0000435	nmiR03128.1:1	Endogenous1	miRNA	-2.97	0.000128	0.07
hsa-miR-155-5p	MIMAT0000646	nmiR03135.1:1	Endogenous1	miRNA	-3.2	0.00016045	0.08
hsa-miR-146a-5p	MIMAT0000449	nmiR03217.1:1	Endogenous1	miRNA	-3.28	0.00045887	0.21
hsa-miR-214-3p	MIMAT0000271	nmiR03272.1:1	Endogenous1	miRNA	-2.05	0.00063856	0.26
hsa-miR-204-5p	MIMAT0000265	nmiR03263.1:1	Endogenous1	miRNA	2.55	0.00065585	0.26
hsa-miR-92b-3p	MIMAT0003218	nmiR03171.1:1	Endogenous1	miRNA	1.46	0.00069112	0.26
hsa-miR-223-3p	MIMAT0000280	nmiR03283.1:1	Endogenous1	miRNA	-3.85	0.00077842	0.26
hsa-miR-497-5p	MIMAT0002820	nmiR03421.1:1	Endogenous1	miRNA	-1.81	0.00081983	0.26
hsa-miR-126-3p	MIMAT0000445	nmiR03191.1:1	Endogenous1	miRNA	-2.95	0.00084803	0.26
hsa-miR-128-3p	MIMAT0000424	nmiR03194.1:1	Endogenous1	miRNA	1.86	0.00105517	0.29
hsa-miR-145-5p	MIMAT0000437	nmiR03216.1:1	Endogenous1	miRNA	-2.6	0.00106684	0.29
hsa-miR-181a-3p	MIMAT0000270	nmiR03914.1:1	Endogenous1	miRNA	-1.44	0.00107768	0.29
hsa-miR-146b-5p	MIMAT0002809	nmiR03219.1:1	Endogenous1	miRNA	-2.45	0.0011508	0.3
hsa-miR-378i	MIMAT0019074	nmiR03179.1:1	Endogenous1	miRNA	-1.31	0.00123439	0.3
hsa-miR-885-5p	MIMAT0004947	nmiR03700.1:1	Endogenous1	miRNA	1.87	0.00136063	0.32
hsa-miR-6724-5p	MIMAT0025856	nmiR04000.1:1	Endogenous1	miRNA	1.59	0.00142282	0.32
hsa-miR-149-5p	MIMAT0000450	nmiR03224.1:1	Endogenous1	miRNA	2.09	0.0022359	0.49
hsa-miR-519b-5p+hsa-miR-519c-5p+hsa-miR-523-5p+hsa-miR-518e-5p+hsa-miR-522-5p+hsa-miR-519a-5p	MIMAT0005454	nmiR03471.1:1	Endogenous1	miRNA	1.35	0.00268838	0.57
hsa-miR-140-3p	MIMAT0004597	nmiR03210.1:1	Endogenous1	miRNA	-1.36	0.00404848	0.83
hsa-miR-328-3p	MIMAT0000752	nmiR03313.1:1	Endogenous1	miRNA	1.31	0.00696923	1
hsa-miR-455-5p	MIMAT0003150	nmiR03400.1:1	Endogenous1	miRNA	-1.37	0.00791928	1
hsa-miR-4443	MIMAT0018961	nmiR03904.1:1	Endogenous1	miRNA	1.47	0.00879629	1
hsa-miR-1469	MIMAT0007347	nmiR03832.1:1	Endogenous1	miRNA	-1.63	0.00928436	1
hsa-miR-1260b	MIMAT0015041	nmiR03774.1:1	Endogenous1	miRNA	1.37	0.00988891	1
hsa-miR-4286	MIMAT0016916	nmiR03899.1:1	Endogenous1	miRNA	-2.51	0.0105436	1
hsa-miR-518b	MIMAT0002844	nmiR03465.1:1	Endogenous1	miRNA	-1.57	0.0109202	1
hsa-miR-494-3p	MIMAT0002816	nmiR03418.1:1	Endogenous1	miRNA	-2.19	0.0117837	1
hsa-miR-371a-5p	MIMAT0004687	nmiR03345.1:1	Endogenous1	miRNA	-1.32	0.0125055	1
hsa-miR-421	MIMAT0003339	nmiR03376.1:1	Endogenous1	miRNA	-1.39	0.0132545	1
B2M	NM_004048.2	NM_004048.2:25	Housekeeping	miRNA	-1.92	0.0135266	1
hsa-miR-4488	MIMAT0019022	nmiR03269.1:1	Endogenous1	miRNA	-2.21	0.0137622	1
hsa-miR-129-5p	MIMAT0000242	nmiR03196.1:1	Endogenous1	miRNA	1.59	0.0148116	1
hsa-miR-615-5p	MIMAT0004804	nmiR03611.1:1	Endogenous1	miRNA	1.27	0.0151443	1
hsa-miR-4455	MIMAT0018977	nmiR03908.1:1	Endogenous1	miRNA	1.42	0.0163718	1
hsa-miR-195-5p	MIMAT0000461	nmiR03250.1:1	Endogenous1	miRNA	-1.74	0.0178893	1
hsa-miR-576-5p	MIMAT0003241	nmiR03569.1:1	Endogenous1	miRNA	1.18	0.0181177	1
hsa-miR-1260a	MIMAT0005911	nmiR03775.1:1	Endogenous1	miRNA	1.86	0.0198402	1
hsa-miR-183-5p	MIMAT0000261	nmiR03236.1:1	Endogenous1	miRNA	1.41	0.0205133	1
hsa-miR-297	MIMAT0004450	nmiR03287.1:1	Endogenous1	miRNA	-1.42	0.0231017	1
hsa-miR-375	MIMAT0000728	nmiR03351.1:1	Endogenous1	miRNA	2.42	0.0238305	1
hsa-miR-555	MIMAT0003219	nmiR03549.1:1	Endogenous1	miRNA	1.21	0.0238413	1
hsa-miR-140-5p	MIMAT0000431	nmiR03211.1:1	Endogenous1	miRNA	-1.75	0.0241876	1
hsa-miR-548j-3p	MIMAT0026737	nmiR04025.1:1	Endogenous1	miRNA	1.26	0.026555	1
hsa-miR-603	MIMAT0003271	nmiR03598.1:1	Endogenous1	miRNA	1.39	0.0266932	1
hsa-miR-4707-3p	MIMAT0019808	nmiR03947.1:1	Endogenous1	miRNA	-1.24	0.0325819	1
hsa-miR-610	MIMAT0003278	nmiR03605.1:1	Endogenous1	miRNA	1.26	0.0327813	1
hsa-miR-34c-5p	MIMAT0000686	nmiR03168.1:1	Endogenous1	miRNA	-1.98	0.0340164	1
hsa-miR-548a-3p	MIMAT0003251	nmiR03505.1:1	Endogenous1	miRNA	1.19	0.0356095	1
hsa-miR-498	MIMAT0002824	nmiR03422.1:1	Endogenous1	miRNA	1.27	0.0372527	1
hsa-miR-548aa+hsa-miR-548t-3p	MIMAT0018447	nmiR03377.1:1	Endogenous1	miRNA	1.48	0.0383877	1
hsa-miR-488-3p	MIMAT0004763	nmiR03409.1:1	Endogenous1	miRNA	1.27	0.0387846	1
hsa-miR-605-5p	MIMAT0003273	nmiR03600.1:1	Endogenous1	miRNA	-1.24	0.0409853	1
hsa-miR-342-3p	MIMAT0000753	nmiR03328.1:1	Endogenous1	miRNA	-1.77	0.041925	1
hsa-miR-95-3p	MIMAT0000094	nmiR03173.1:1	Endogenous1	miRNA	1.52	0.042969	1
hsa-miR-515-5p	MIMAT0002826	nmiR03458.1:1	Endogenous1	miRNA	1.16	0.0459183	1
hsa-miR-889-3p	MIMAT0004921	nmiR03436.1:1	Endogenous1	miRNA	-1.24	0.0469947	1
hsa-miR-7-5p	MIMAT0000252	nmiR03123.1:1	Endogenous1	miRNA	1.63	0.0480081	1
hsa-miR-34b-3p	MIMAT0004676	nmiR03166.1:1	Endogenous1	miRNA	-1.24	0.0486159	1
hsa-miR-216b-5p	MIMAT0004959	nmiR03275.1:1	Endogenous1	miRNA	1.21	0.0496716	1
hsa-miR-499a-5p	MIMAT0002870	nmiR03428.1:1	Endogenous1	miRNA	1.22	0.0507253	1
hsa-miR-3202	MIMAT0015089	nmiR03932.1:1	Endogenous1	miRNA	1.18	0.0507413	1
hsa-miR-1193	MIMAT0015049	nmiR03732.1:1	Endogenous1	miRNA	-1.18	0.051183	1
hsa-miR-517b-3p	MIMAT0002857	nmiR03462.1:1	Endogenous1	miRNA	-1.24	0.0517076	1
hsa-miR-548n	MIMAT0005916	nmiR03531.1:1	Endogenous1	miRNA	1.31	0.0519381	1
hsa-miR-1202	MIMAT0005865	nmiR03735.1:1	Endogenous1	miRNA	1.23	0.0522538	1
hsa-miR-378g	MIMAT0018937	nmiR03361.1:1	Endogenous1	miRNA	-1.18	0.05332	1
hsa-miR-452-5p	MIMAT0001635	nmiR03395.1:1	Endogenous1	miRNA	-1.24	0.0549369	1
hsa-miR-550a-5p	MIMAT0004800	nmiR03542.1:1	Endogenous1	miRNA	1.2	0.056436	1
hsa-miR-96-5p	MIMAT0000095	nmiR03174.1:1	Endogenous1	miRNA	1.33	0.0570581	1
hsa-miR-1253	MIMAT0005904	nmiR03767.1:1	Endogenous1	miRNA	1.29	0.0571835	1
hsa-miR-302f	MIMAT0005932	nmiR03299.1:1	Endogenous1	miRNA	1.2	0.05797	1
hsa-miR-1275	MIMAT0005929	nmiR03796.1:1	Endogenous1	miRNA	1.28	0.0580479	1
hsa-miR-606	MIMAT0003274	nmiR03601.1:1	Endogenous1	miRNA	1.2	0.0587528	1
hsa-miR-1247-5p	MIMAT0005899	nmiR03761.1:1	Endogenous1	miRNA	-1.32	0.0590383	1
LIG_NEG_B	nmiR00828.1	nmiR00828.1:1	Ligation	miRNA	1.17	0.0601152	1
hsa-miR-1206	MIMAT0005870	nmiR03739.1:1	Endogenous1	miRNA	1.21	0.060199	1
hsa-miR-23a-3p	MIMAT0000078	nmiR03141.1:1	Endogenous1	miRNA	-1.73	0.0607065	1
hsa-miR-608	MIMAT0003276	nmiR03603.1:1	Endogenous1	miRNA	-1.2	0.0612743	1
hsa-miR-130a-3p	MIMAT0000425	nmiR03197.1:1	Endogenous1	miRNA	-1.74	0.0618279	1
hsa-miR-302a-5p	MIMAT0000683	nmiR03915.1:1	Endogenous1	miRNA	-1.19	0.0625288	1
hsa-miR-4448	MIMAT0018967	nmiR03905.1:1	Endogenous1	miRNA	-1.43	0.0649738	1
hsa-miR-99b-5p	MIMAT0000689	nmiR03178.1:1	Endogenous1	miRNA	1.5	0.0654565	1
hsa-miR-660-5p	MIMAT0003338	nmiR03660.1:1	Endogenous1	miRNA	-1.23	0.0655603	1
hsa-miR-516a-3p+hsa-miR-516b-3p	MIMAT0006778	nmiR03341.1:1	Endogenous1	miRNA	-1.16	0.0676435	1
hsa-miR-509-5p	MIMAT0004779	nmiR03445.1:1	Endogenous1	miRNA	1.22	0.0686418	1
hsa-miR-1291	MIMAT0005881	nmiR03811.1:1	Endogenous1	miRNA	1.24	0.0692766	1
hsa-miR-2053	MIMAT0009978	nmiR03853.1:1	Endogenous1	miRNA	-1.19	0.0717378	1
hsa-miR-4516	MIMAT0019053	nmiR03357.1:1	Endogenous1	miRNA	-1.49	0.0726014	1
hsa-miR-601	MIMAT0003269	nmiR03596.1:1	Endogenous1	miRNA	-1.37	0.0782893	1
hsa-miR-1180-3p	MIMAT0005825	nmiR03726.1:1	Endogenous1	miRNA	1.34	0.078525	1
hsa-miR-202-3p	MIMAT0002811	nmiR03261.1:1	Endogenous1	miRNA	1.22	0.0785603	1
hsa-miR-877-5p	MIMAT0004949	nmiR03698.1:1	Endogenous1	miRNA	-1.33	0.0816381	1
hsa-miR-137	MIMAT0000429	nmiR03206.1:1	Endogenous1	miRNA	1.3	0.0833968	1
hsa-miR-655-3p	MIMAT0003331	nmiR03655.1:1	Endogenous1	miRNA	-1.22	0.0845619	1
hsa-miR-888-5p	MIMAT0004916	nmiR03702.1:1	Endogenous1	miRNA	1.3	0.0846809	1
hsa-miR-3179	MIMAT0015056	nmiR03930.1:1	Endogenous1	miRNA	1.18	0.0863814	1
hsa-miR-142-5p	MIMAT0000433	nmiR03214.1:1	Endogenous1	miRNA	-1.2	0.0869605	1
hsa-miR-483-3p	MIMAT0002173	nmiR03401.1:1	Endogenous1	miRNA	1.5	0.0873361	1
hsa-miR-153-3p	MIMAT0000439	nmiR03230.1:1	Endogenous1	miRNA	1.24	0.0874808	1
LIG_POS_C	nmiR00811.1	nmiR00811.1:1	Ligation	miRNA	1.33	0.0878249	1
hsa-miR-105-5p	MIMAT0000102	nmiR03183.1:1	Endogenous1	miRNA	1.31	0.0902015	1
hsa-miR-206	MIMAT0000462	nmiR03265.1:1	Endogenous1	miRNA	-1.78	0.0914321	1
hsa-miR-28-3p	MIMAT0004502	nmiR03150.1:1	Endogenous1	miRNA	-1.21	0.0923024	1
hsa-miR-499a-3p	MIMAT0004772	nmiR03426.1:1	Endogenous1	miRNA	1.16	0.0924771	1
hsa-miR-181c-5p	MIMAT0000258	nmiR03234.1:1	Endogenous1	miRNA	-1.33	0.0937984	1
hsa-miR-631	MIMAT0003300	nmiR03628.1:1	Endogenous1	miRNA	-1.19	0.0945734	1
hsa-miR-320b	MIMAT0005792	nmiR03301.1:1	Endogenous1	miRNA	1.18	0.0951825	1
hsa-miR-217	MIMAT0000274	nmiR03276.1:1	Endogenous1	miRNA	-1.15	0.0962454	1
hsa-miR-1-3p	MIMAT0000416	nmiR03122.1:1	Endogenous1	miRNA	-1.56	0.0964599	1
hsa-miR-520a-3p	MIMAT0002834	nmiR03475.1:1	Endogenous1	miRNA	-1.19	0.0976151	1
hsa-miR-592	MIMAT0003260	nmiR03589.1:1	Endogenous1	miRNA	1.21	0.097684	1
hsa-miR-892a	MIMAT0004907	nmiR03706.1:1	Endogenous1	miRNA	1.15	0.0984966	1
hsa-miR-577	MIMAT0003242	nmiR03571.1:1	Endogenous1	miRNA	1.22	0.0999185	1
hsa-miR-1245b-3p	MIMAT0019951	nmiR03758.1:1	Endogenous1	miRNA	1.18	0.100414	1
hsa-miR-345-5p	MIMAT0000772	nmiR03330.1:1	Endogenous1	miRNA	1.18	0.101034	1
hsa-miR-222-3p	MIMAT0000279	nmiR03282.1:1	Endogenous1	miRNA	-1.78	0.10271	1
hsa-miR-323a-5p	MIMAT0004696	nmiR03308.1:1	Endogenous1	miRNA	-1.17	0.106753	1
hsa-miR-4532	MIMAT0019071	nmiR03888.1:1	Endogenous1	miRNA	-1.68	0.10685	1
hsa-miR-3140-5p	MIMAT0019204	nmiR03944.1:1	Endogenous1	miRNA	-1.22	0.106993	1
hsa-miR-1304-3p	MIMAT0022720	nmiR03981.1:1	Endogenous1	miRNA	-1.23	0.107092	1
hsa-miR-548d-3p	MIMAT0003323	nmiR03521.1:1	Endogenous1	miRNA	1.27	0.113054	1
LIG_POS_B	nmiR00809.1	nmiR00809.1:1	Ligation	miRNA	1.26	0.115943	1
hsa-miR-599	MIMAT0003267	nmiR03594.1:1	Endogenous1	miRNA	-1.29	0.120025	1
hsa-miR-148a-3p	MIMAT0000243	nmiR03223.1:1	Endogenous1	miRNA	-1.71	0.12252	1
hsa-miR-335-5p	MIMAT0000765	nmiR03319.1:1	Endogenous1	miRNA	1.25	0.122956	1
hsa-miR-613	MIMAT0003281	nmiR03608.1:1	Endogenous1	miRNA	1.14	0.124723	1
hsa-miR-100-5p	MIMAT0000098	nmiR03180.1:1	Endogenous1	miRNA	-1.74	0.125721	1
hsa-miR-1178-3p	MIMAT0005823	nmiR03724.1:1	Endogenous1	miRNA	-1.21	0.12636	1
hsa-miR-1273c	MIMAT0015017	nmiR03790.1:1	Endogenous1	miRNA	1.2	0.126914	1
hsa-miR-30a-3p	MIMAT0000088	nmiR03912.1:1	Endogenous1	miRNA	-1.2	0.128213	1
hsa-miR-2117	MIMAT0011162	nmiR03859.1:1	Endogenous1	miRNA	1.13	0.134075	1
hsa-miR-425-5p	MIMAT0003393	nmiR03382.1:1	Endogenous1	miRNA	1.42	0.134957	1
hsa-miR-125a-5p	MIMAT0000443	nmiR03189.1:1	Endogenous1	miRNA	1.33	0.135467	1
hsa-miR-490-3p	MIMAT0002806	nmiR03412.1:1	Endogenous1	miRNA	-1.15	0.137361	1
hsa-miR-874-5p	MIMAT0026718	nmiR04020.1:1	Endogenous1	miRNA	1.32	0.1391	1
hsa-miR-548ah-5p	MIMAT0018972	nmiR03511.1:1	Endogenous1	miRNA	1.19	0.14013	1
hsa-miR-3140-3p	MIMAT0015008	nmiR03926.1:1	Endogenous1	miRNA	1.23	0.140958	1
hsa-miR-1271-3p	MIMAT0022712	nmiR03976.1:1	Endogenous1	miRNA	1.21	0.142489	1
hsa-miR-4536-5p	MIMAT0019078	nmiR03943.1:1	Endogenous1	miRNA	1.18	0.144484	1
hsa-miR-136-5p	MIMAT0000448	nmiR03205.1:1	Endogenous1	miRNA	-1.33	0.145914	1
hsa-miR-3164	MIMAT0015038	nmiR03875.1:1	Endogenous1	miRNA	1.14	0.146862	1
hsa-miR-3136-5p	MIMAT0015003	nmiR03868.1:1	Endogenous1	miRNA	1.15	0.148552	1
hsa-miR-128-1-5p	MIMAT0026477	nmiR04002.1:1	Endogenous1	miRNA	1.13	0.148636	1
hsa-miR-92a-3p	MIMAT0000092	nmiR03169.1:1	Endogenous1	miRNA	1.27	0.149157	1
hsa-miR-891a-5p	MIMAT0004902	nmiR03704.1:1	Endogenous1	miRNA	1.28	0.152338	1
hsa-miR-548c-5p+hsa-miR-548o-5p+hsa-miR-548am-5p	MIMAT0004806	nmiR03520.1:1	Endogenous1	miRNA	-1.17	0.153149	1
hsa-miR-489-3p	MIMAT0002805	nmiR03410.1:1	Endogenous1	miRNA	-1.22	0.153268	1
LIG_POS_A	nmiR00813.1	nmiR00813.1:1	Ligation	miRNA	1.2	0.153574	1
hsa-miR-210-3p	MIMAT0000267	nmiR03268.1:1	Endogenous1	miRNA	1.28	0.155919	1
hsa-miR-139-5p	MIMAT0000250	nmiR03209.1:1	Endogenous1	miRNA	1.21	0.156254	1
hsa-miR-455-3p	MIMAT0004784	nmiR03398.1:1	Endogenous1	miRNA	-1.21	0.156693	1
hsa-miR-570-3p	MIMAT0003235	nmiR03427.1:1	Endogenous1	miRNA	1.13	0.156926	1
hsa-miR-656-3p	MIMAT0003332	nmiR03656.1:1	Endogenous1	miRNA	1.22	0.157813	1
hsa-miR-512-3p	MIMAT0002823	nmiR03448.1:1	Endogenous1	miRNA	-1.22	0.157941	1
hsa-miR-939-5p	MIMAT0004982	nmiR03718.1:1	Endogenous1	miRNA	-1.34	0.159685	1
hsa-miR-374a-5p	MIMAT0000727	nmiR03348.1:1	Endogenous1	miRNA	-1.48	0.160149	1
hsa-miR-519e-3p	MIMAT0002829	nmiR03474.1:1	Endogenous1	miRNA	1.14	0.161257	1
hsa-miR-3190-3p	MIMAT0022839	nmiR03886.1:1	Endogenous1	miRNA	1.23	0.162256	1
hsa-miR-411-5p	MIMAT0003329	nmiR03373.1:1	Endogenous1	miRNA	1.19	0.16655	1
hsa-miR-556-3p	MIMAT0004793	nmiR03550.1:1	Endogenous1	miRNA	1.13	0.166799	1
hsa-miR-423-3p	MIMAT0001340	nmiR03378.1:1	Endogenous1	miRNA	1.2	0.169258	1
hsa-miR-1276	MIMAT0005930	nmiR03797.1:1	Endogenous1	miRNA	1.23	0.169732	1
hsa-miR-181b-2-3p	MIMAT0031893	nmiR04033.1:1	Endogenous1	miRNA	-1.14	0.169882	1
hsa-miR-520f-3p	MIMAT0002830	nmiR03482.1:1	Endogenous1	miRNA	1.17	0.171077	1
hsa-miR-548ar-5p	MIMAT0022265	nmiR03959.1:1	Endogenous1	miRNA	1.23	0.172151	1
hsa-miR-548d-5p	MIMAT0004812	nmiR03522.1:1	Endogenous1	miRNA	1.17	0.17374	1
hsa-miR-524-3p	MIMAT0002850	nmiR03489.1:1	Endogenous1	miRNA	1.15	0.176569	1
hsa-miR-525-5p	MIMAT0002838	nmiR03492.1:1	Endogenous1	miRNA	1.16	0.177415	1
hsa-miR-372-3p	MIMAT0000724	nmiR03346.1:1	Endogenous1	miRNA	1.19	0.177797	1
hsa-miR-133a-3p	MIMAT0000427	nmiR03200.1:1	Endogenous1	miRNA	-1.46	0.178521	1
hsa-miR-363-5p	MIMAT0003385	nmiR03917.1:1	Endogenous1	miRNA	1.13	0.178767	1
hsa-miR-627-5p	MIMAT0003296	nmiR03623.1:1	Endogenous1	miRNA	1.14	0.181101	1
hsa-miR-422a	MIMAT0001339	nmiR03190.1:1	Endogenous1	miRNA	1.25	0.181168	1
hsa-miR-1289	MIMAT0005879	nmiR03809.1:1	Endogenous1	miRNA	1.15	0.181384	1
hsa-miR-340-5p	MIMAT0004692	nmiR03326.1:1	Endogenous1	miRNA	1.34	0.182024	1
hsa-miR-490-5p	MIMAT0004764	nmiR03413.1:1	Endogenous1	miRNA	1.13	0.184347	1
hsa-miR-769-5p	MIMAT0003886	nmiR03689.1:1	Endogenous1	miRNA	1.18	0.187396	1
hsa-miR-541-3p	MIMAT0004920	nmiR03498.1:1	Endogenous1	miRNA	-1.17	0.187829	1
hsa-miR-649	MIMAT0003319	nmiR03648.1:1	Endogenous1	miRNA	1.16	0.188106	1
hsa-miR-329-5p	MIMAT0026555	nmiR04010.1:1	Endogenous1	miRNA	1.12	0.189693	1
hsa-miR-664b-5p	MIMAT0022271	nmiR03961.1:1	Endogenous1	miRNA	-1.26	0.190445	1
hsa-miR-760	MIMAT0004957	nmiR03680.1:1	Endogenous1	miRNA	-1.14	0.192855	1
hsa-miR-548z+hsa-miR-548h-3p	MIMAT0018446	nmiR03541.1:1	Endogenous1	miRNA	1.34	0.194673	1
hsa-miR-10a-5p	MIMAT0000253	nmiR03125.1:1	Endogenous1	miRNA	-1.58	0.195587	1
hsa-miR-181a-5p	MIMAT0000256	nmiR03232.1:1	Endogenous1	miRNA	-1.45	0.197366	1
hsa-miR-663a	MIMAT0003326	nmiR03664.1:1	Endogenous1	miRNA	1.42	0.198193	1
hsa-miR-518d-3p	MIMAT0002864	nmiR03467.1:1	Endogenous1	miRNA	1.11	0.20205	1
hsa-miR-496	MIMAT0002818	nmiR03420.1:1	Endogenous1	miRNA	1.17	0.202281	1
hsa-miR-4431	MIMAT0018947	nmiR03902.1:1	Endogenous1	miRNA	-1.13	0.20673	1
hsa-miR-380-3p	MIMAT0000735	nmiR03364.1:1	Endogenous1	miRNA	1.14	0.208091	1
hsa-miR-873-3p	MIMAT0022717	nmiR03979.1:1	Endogenous1	miRNA	1.1	0.209432	1
hsa-miR-671-3p	MIMAT0004819	nmiR03670.1:1	Endogenous1	miRNA	1.18	0.20958	1
hsa-miR-337-5p	MIMAT0004695	nmiR03321.1:1	Endogenous1	miRNA	-1.29	0.210285	1
hsa-miR-132-3p	MIMAT0000426	nmiR03199.1:1	Endogenous1	miRNA	1.16	0.213319	1
hsa-miR-642a-3p	MIMAT0020924	nmiR03951.1:1	Endogenous1	miRNA	-1.28	0.213707	1
hsa-miR-548l	MIMAT0005889	nmiR03529.1:1	Endogenous1	miRNA	1.13	0.216564	1
hsa-miR-4531	MIMAT0019070	nmiR03851.1:1	Endogenous1	miRNA	1.16	0.218561	1
hsa-miR-323a-3p	MIMAT0000755	nmiR03307.1:1	Endogenous1	miRNA	1.48	0.220132	1
hsa-miR-367-3p	MIMAT0000719	nmiR03154.1:1	Endogenous1	miRNA	1.12	0.221498	1
hsa-miR-875-3p	MIMAT0004923	nmiR03694.1:1	Endogenous1	miRNA	1.13	0.222001	1
hsa-miR-424-5p	MIMAT0001341	nmiR03381.1:1	Endogenous1	miRNA	-1.26	0.225043	1
hsa-miR-374c-5p	MIMAT0018443	nmiR03350.1:1	Endogenous1	miRNA	1.19	0.225848	1
hsa-miR-331-5p	MIMAT0004700	nmiR03318.1:1	Endogenous1	miRNA	-1.11	0.226337	1
hsa-miR-4458	MIMAT0018980	nmiR03909.1:1	Endogenous1	miRNA	1.1	0.226696	1
hsa-miR-548q	MIMAT0011163	nmiR03533.1:1	Endogenous1	miRNA	1.17	0.227372	1
hsa-miR-579-3p	MIMAT0003244	nmiR03573.1:1	Endogenous1	miRNA	4.03	0.227881	1
hsa-miR-885-3p	MIMAT0004948	nmiR03699.1:1	Endogenous1	miRNA	1.13	0.228697	1
hsa-miR-185-5p	MIMAT0000455	nmiR03238.1:1	Endogenous1	miRNA	-1.14	0.231343	1
hsa-miR-28-5p	MIMAT0000085	nmiR03151.1:1	Endogenous1	miRNA	-1.37	0.231588	1
hsa-miR-770-5p	MIMAT0003948	nmiR03690.1:1	Endogenous1	miRNA	1.17	0.232226	1
hsa-miR-423-5p	MIMAT0004748	nmiR03380.1:1	Endogenous1	miRNA	1.28	0.233038	1
hsa-miR-532-5p	MIMAT0002888	nmiR03496.1:1	Endogenous1	miRNA	-1.18	0.233299	1
LIG_NEG_A	nmiR00810.1	nmiR00810.1:1	Ligation	miRNA	-1.14	0.23339	1
hsa-miR-219a-1-3p	MIMAT0004567	nmiR03278.1:1	Endogenous1	miRNA	1.16	0.235591	1
hsa-miR-148b-3p	MIMAT0000759	nmiR03130.1:1	Endogenous1	miRNA	1.19	0.235646	1
hsa-miR-4435	MIMAT0018951	nmiR03903.1:1	Endogenous1	miRNA	1.11	0.236258	1
hsa-miR-539-3p	MIMAT0022705	nmiR03971.1:1	Endogenous1	miRNA	-1.15	0.237668	1
hsa-miR-1304-5p	MIMAT0005892	nmiR03823.1:1	Endogenous1	miRNA	-1.09	0.244168	1
hsa-miR-1185-1-3p	MIMAT0022838	nmiR03986.1:1	Endogenous1	miRNA	-1.22	0.24493	1
hsa-miR-2278	MIMAT0011778	nmiR03863.1:1	Endogenous1	miRNA	1.15	0.247176	1
hsa-miR-1537-3p	MIMAT0007399	nmiR03835.1:1	Endogenous1	miRNA	-1.09	0.248316	1
hsa-miR-139-3p	MIMAT0004552	nmiR03208.1:1	Endogenous1	miRNA	1.15	0.24876	1
hsa-miR-644a	MIMAT0003314	nmiR03643.1:1	Endogenous1	miRNA	1.14	0.25075	1
hsa-miR-3161	MIMAT0015035	nmiR03874.1:1	Endogenous1	miRNA	1.16	0.251104	1
hsa-miR-193a-3p	MIMAT0000459	nmiR03246.1:1	Endogenous1	miRNA	-1.2	0.254468	1
hsa-miR-4454+hsa-miR-7975	MIMAT0018976	nmiR03907.1:1	Endogenous1	miRNA	1.36	0.255729	1
hsa-miR-625-5p	MIMAT0003294	nmiR03621.1:1	Endogenous1	miRNA	-1.13	0.256425	1
hsa-miR-876-3p	MIMAT0004925	nmiR03696.1:1	Endogenous1	miRNA	-1.12	0.256577	1
hsa-miR-1323	MIMAT0005795	nmiR03829.1:1	Endogenous1	miRNA	1.15	0.256926	1
hsa-miR-589-5p	MIMAT0004799	nmiR03585.1:1	Endogenous1	miRNA	-1.14	0.257128	1
hsa-miR-1972	MIMAT0009447	nmiR03848.1:1	Endogenous1	miRNA	1.4	0.257767	1
hsa-miR-6503-3p	MIMAT0025463	nmiR03995.1:1	Endogenous1	miRNA	1.1	0.258596	1
hsa-miR-30e-3p	MIMAT0000693	nmiR03916.1:1	Endogenous1	miRNA	-1.09	0.259095	1
hsa-miR-378e	MIMAT0018927	nmiR03359.1:1	Endogenous1	miRNA	1.19	0.259358	1
hsa-miR-630	MIMAT0003299	nmiR03627.1:1	Endogenous1	miRNA	1.32	0.259903	1
hsa-miR-197-3p	MIMAT0000227	nmiR03253.1:1	Endogenous1	miRNA	1.23	0.261636	1
hsa-miR-3180	MIMAT0018178	nmiR03881.1:1	Endogenous1	miRNA	1.12	0.263379	1
hsa-miR-3613-5p	MIMAT0017990	nmiR03935.1:1	Endogenous1	miRNA	-1.16	0.26563	1
hsa-miR-371b-5p	MIMAT0019892	nmiR03343.1:1	Endogenous1	miRNA	-1.15	0.266196	1
hsa-miR-873-5p	MIMAT0004953	nmiR03692.1:1	Endogenous1	miRNA	1.11	0.26822	1
hsa-miR-1269a	MIMAT0005923	nmiR03786.1:1	Endogenous1	miRNA	-1.12	0.268306	1
hsa-miR-1185-2-3p	MIMAT0022713	nmiR03977.1:1	Endogenous1	miRNA	-1.14	0.270133	1
hsa-miR-3185	MIMAT0015065	nmiR03884.1:1	Endogenous1	miRNA	-1.13	0.272088	1
hsa-miR-182-5p	MIMAT0000259	nmiR03235.1:1	Endogenous1	miRNA	1.33	0.273687	1
hsa-miR-337-3p	MIMAT0000754	nmiR03320.1:1	Endogenous1	miRNA	-1.18	0.27489	1
hsa-miR-515-3p	MIMAT0002827	nmiR03457.1:1	Endogenous1	miRNA	1.13	0.278866	1
hsa-miR-567	MIMAT0003231	nmiR03560.1:1	Endogenous1	miRNA	1.09	0.285935	1
hsa-miR-549a	MIMAT0003333	nmiR03411.1:1	Endogenous1	miRNA	1.16	0.292581	1
hsa-miR-582-5p	MIMAT0003247	nmiR03577.1:1	Endogenous1	miRNA	1.19	0.295388	1
hsa-miR-338-5p	MIMAT0004701	nmiR03323.1:1	Endogenous1	miRNA	-1.13	0.296606	1
hsa-miR-617	MIMAT0003286	nmiR03613.1:1	Endogenous1	miRNA	1.08	0.297125	1
hsa-miR-495-3p	MIMAT0002817	nmiR03419.1:1	Endogenous1	miRNA	1.29	0.299376	1
hsa-miR-30e-5p	MIMAT0000692	nmiR03160.1:1	Endogenous1	miRNA	-1.19	0.300621	1
hsa-miR-1236-3p	MIMAT0005591	nmiR03752.1:1	Endogenous1	miRNA	-1.11	0.304001	1
hsa-miR-26b-5p	MIMAT0000083	nmiR03147.1:1	Endogenous1	miRNA	-1.3	0.304545	1
hsa-miR-331-3p	MIMAT0000760	nmiR03317.1:1	Endogenous1	miRNA	1.3	0.304903	1
hsa-miR-518c-3p	MIMAT0002848	nmiR03466.1:1	Endogenous1	miRNA	-1.11	0.305612	1
hsa-miR-485-5p	MIMAT0002175	nmiR03405.1:1	Endogenous1	miRNA	-1.11	0.306593	1
hsa-miR-26a-5p	MIMAT0000082	nmiR03146.1:1	Endogenous1	miRNA	-1.3	0.307581	1
hsa-miR-650	MIMAT0003320	nmiR03649.1:1	Endogenous1	miRNA	-1.13	0.30843	1
hsa-miR-1293	MIMAT0005883	nmiR03813.1:1	Endogenous1	miRNA	1.12	0.310853	1
hsa-miR-218-5p	MIMAT0000275	nmiR03277.1:1	Endogenous1	miRNA	-1.2	0.312034	1
hsa-miR-652-5p	MIMAT0022709	nmiR03974.1:1	Endogenous1	miRNA	1.41	0.313756	1
hsa-miR-578	MIMAT0003243	nmiR03572.1:1	Endogenous1	miRNA	1.12	0.315629	1
hsa-miR-934	MIMAT0004977	nmiR03713.1:1	Endogenous1	miRNA	-1.09	0.317655	1
hsa-miR-539-5p	MIMAT0003163	nmiR03497.1:1	Endogenous1	miRNA	1.22	0.322741	1
hsa-miR-642a-5p	MIMAT0003312	nmiR03639.1:1	Endogenous1	miRNA	-1.11	0.323456	1
hsa-miR-3150b-3p	MIMAT0018194	nmiR03941.1:1	Endogenous1	miRNA	1.1	0.323585	1
hsa-miR-147a	MIMAT0000251	nmiR03222.1:1	Endogenous1	miRNA	-1.11	0.32597	1
hsa-miR-362-5p	MIMAT0000705	nmiR03335.1:1	Endogenous1	miRNA	-1.1	0.326196	1
hsa-miR-513a-5p	MIMAT0002877	nmiR03451.1:1	Endogenous1	miRNA	-1.1	0.326842	1
hsa-miR-107	MIMAT0000104	nmiR03186.1:1	Endogenous1	miRNA	1.22	0.327417	1
hsa-miR-758-5p	MIMAT0022929	nmiR03993.1:1	Endogenous1	miRNA	-1.14	0.328729	1
hsa-miR-616-3p	MIMAT0004805	nmiR03612.1:1	Endogenous1	miRNA	-1.13	0.32926	1
hsa-miR-433-5p	MIMAT0026554	nmiR04009.1:1	Endogenous1	miRNA	-1.11	0.331445	1
hsa-miR-3151-5p	MIMAT0015024	nmiR03872.1:1	Endogenous1	miRNA	1.1	0.33161	1
hsa-miR-326	MIMAT0000756	nmiR03312.1:1	Endogenous1	miRNA	1.11	0.33538	1
hsa-miR-518f-3p	MIMAT0002842	nmiR03469.1:1	Endogenous1	miRNA	1.12	0.337627	1
hsa-miR-152-3p	MIMAT0000438	nmiR03229.1:1	Endogenous1	miRNA	-1.12	0.337699	1
hsa-miR-34c-3p	MIMAT0004677	nmiR03167.1:1	Endogenous1	miRNA	-1.1	0.338987	1
hsa-miR-34a-5p	MIMAT0000255	nmiR03165.1:1	Endogenous1	miRNA	-1.23	0.339168	1
hsa-miR-3144-3p	MIMAT0015015	nmiR03927.1:1	Endogenous1	miRNA	1.12	0.340857	1
hsa-miR-320a	MIMAT0000510	nmiR03300.1:1	Endogenous1	miRNA	-1.1	0.340989	1
hsa-miR-4521	MIMAT0019058	nmiR03488.1:1	Endogenous1	miRNA	1.16	0.341579	1
hsa-miR-203a-3p	MIMAT0000264	nmiR03262.1:1	Endogenous1	miRNA	-1.42	0.34331	1
hsa-miR-612	MIMAT0003280	nmiR03607.1:1	Endogenous1	miRNA	1.11	0.344859	1
hsa-miR-587	MIMAT0003253	nmiR03583.1:1	Endogenous1	miRNA	1.07	0.345243	1
hsa-miR-890	MIMAT0004912	nmiR03703.1:1	Endogenous1	miRNA	1.08	0.345482	1
hsa-miR-210-5p	MIMAT0026475	nmiR04001.1:1	Endogenous1	miRNA	1.11	0.346075	1
hsa-miR-101-3p	MIMAT0000099	nmiR03181.1:1	Endogenous1	miRNA	-1.09	0.346739	1
hsa-miR-450a-5p	MIMAT0001545	nmiR03391.1:1	Endogenous1	miRNA	-1.17	0.347211	1
hsa-miR-378c	MIMAT0016847	nmiR03356.1:1	Endogenous1	miRNA	-1.11	0.348545	1
hsa-miR-551a	MIMAT0003214	nmiR03544.1:1	Endogenous1	miRNA	1.16	0.350211	1
GAPDH	NM_002046.3	NM_002046.3:35	Housekeeping	miRNA	1.35	0.352206	1
hsa-miR-224-5p	MIMAT0000281	nmiR03284.1:1	Endogenous1	miRNA	-1.12	0.355638	1
hsa-miR-3196	MIMAT0015080	nmiR03890.1:1	Endogenous1	miRNA	1.08	0.356841	1
hsa-miR-514a-3p	MIMAT0002883	nmiR03456.1:1	Endogenous1	miRNA	-1.12	0.35815	1
hsa-miR-491-3p	MIMAT0004765	nmiR03414.1:1	Endogenous1	miRNA	1.09	0.35836	1
hsa-miR-1252-5p	MIMAT0005944	nmiR03766.1:1	Endogenous1	miRNA	-1.15	0.359451	1
hsa-miR-151b	MIMAT0010214	nmiR03226.1:1	Endogenous1	miRNA	1.11	0.360812	1
hsa-miR-376b-3p	MIMAT0002172	nmiR03353.1:1	Endogenous1	miRNA	-1.14	0.363174	1
hsa-miR-135a-5p	MIMAT0000428	nmiR03203.1:1	Endogenous1	miRNA	1.13	0.3632	1
hsa-miR-513c-5p	MIMAT0005789	nmiR03454.1:1	Endogenous1	miRNA	-1.11	0.363633	1
hsa-miR-654-5p	MIMAT0003330	nmiR03654.1:1	Endogenous1	miRNA	-1.15	0.364103	1
hsa-miR-3195	MIMAT0015079	nmiR03889.1:1	Endogenous1	miRNA	1.24	0.364856	1
hsa-miR-493-3p	MIMAT0003161	nmiR03417.1:1	Endogenous1	miRNA	1.21	0.364893	1
hsa-miR-92a-1-5p	MIMAT0004507	nmiR03919.1:1	Endogenous1	miRNA	-1.09	0.365429	1
hsa-let-7g-5p	MIMAT0000414	nmiR03119.1:1	Endogenous1	miRNA	-1.29	0.36595	1
hsa-miR-4461	MIMAT0018983	nmiR03910.1:1	Endogenous1	miRNA	1.11	0.368618	1
hsa-miR-767-3p	MIMAT0003883	nmiR03686.1:1	Endogenous1	miRNA	1.08	0.369897	1
hsa-miR-520d-5p+hsa-miR-527+hsa-miR-518a-5p	MIMAT0002855	nmiR03480.1:1	Endogenous1	miRNA	1.08	0.370514	1
hsa-miR-566	MIMAT0003230	nmiR03559.1:1	Endogenous1	miRNA	1.2	0.372232	1
hsa-miR-4741	MIMAT0019871	nmiR03642.1:1	Endogenous1	miRNA	-1.1	0.372389	1
hsa-miR-761	MIMAT0010364	nmiR03681.1:1	Endogenous1	miRNA	-1.11	0.372397	1
hsa-miR-1277-3p	MIMAT0005933	nmiR03798.1:1	Endogenous1	miRNA	-1.08	0.37713	1
hsa-miR-433-3p	MIMAT0001627	nmiR03386.1:1	Endogenous1	miRNA	1.29	0.378818	1
hsa-miR-22-3p	MIMAT0000077	nmiR03140.1:1	Endogenous1	miRNA	-1.32	0.379398	1
hsa-miR-1261	MIMAT0005913	nmiR03776.1:1	Endogenous1	miRNA	-1.07	0.380055	1
hsa-miR-765	MIMAT0003945	nmiR03684.1:1	Endogenous1	miRNA	-1.1	0.382554	1
hsa-miR-548g-3p	MIMAT0005912	nmiR03525.1:1	Endogenous1	miRNA	-1.12	0.383461	1
hsa-miR-3918	MIMAT0018192	nmiR03940.1:1	Endogenous1	miRNA	-1.09	0.385766	1
hsa-miR-487b-3p	MIMAT0003180	nmiR03408.1:1	Endogenous1	miRNA	1.2	0.385802	1
hsa-miR-4755-5p	MIMAT0019895	nmiR03948.1:1	Endogenous1	miRNA	-1.08	0.386691	1
hsa-miR-1976	MIMAT0009451	nmiR03850.1:1	Endogenous1	miRNA	1.1	0.387572	1
hsa-miR-526b-5p	MIMAT0002835	nmiR03494.1:1	Endogenous1	miRNA	-1.11	0.388854	1
hsa-miR-891b	MIMAT0004913	nmiR03705.1:1	Endogenous1	miRNA	1.1	0.389743	1
hsa-miR-221-5p	MIMAT0004568	nmiR03922.1:1	Endogenous1	miRNA	-1.1	0.390763	1
hsa-miR-19b-3p	MIMAT0000074	nmiR03138.1:1	Endogenous1	miRNA	-1.26	0.39105	1
hsa-miR-410-3p	MIMAT0002171	nmiR03371.1:1	Endogenous1	miRNA	-1.18	0.391372	1
hsa-miR-936	MIMAT0004979	nmiR03715.1:1	Endogenous1	miRNA	-1.13	0.391382	1
hsa-miR-1257	MIMAT0005908	nmiR03772.1:1	Endogenous1	miRNA	1.09	0.392139	1
hsa-miR-1266-5p	MIMAT0005920	nmiR03781.1:1	Endogenous1	miRNA	-1.08	0.392653	1
hsa-miR-520h	MIMAT0002867	nmiR03484.1:1	Endogenous1	miRNA	1.08	0.394357	1
hsa-miR-302e	MIMAT0005931	nmiR03298.1:1	Endogenous1	miRNA	1.08	0.396571	1
hsa-miR-1283	MIMAT0005799	nmiR03570.1:1	Endogenous1	miRNA	1.63	0.396814	1
hsa-miR-362-3p	MIMAT0004683	nmiR03334.1:1	Endogenous1	miRNA	-1.15	0.40359	1
hsa-miR-937-3p	MIMAT0004980	nmiR03716.1:1	Endogenous1	miRNA	-1.1	0.404423	1
hsa-miR-376a-3p	MIMAT0000729	nmiR03352.1:1	Endogenous1	miRNA	-1.21	0.404942	1
hsa-let-7e-5p	MIMAT0000066	nmiR03117.1:1	Endogenous1	miRNA	1.2	0.408578	1
hsa-miR-3615	MIMAT0017994	nmiR03938.1:1	Endogenous1	miRNA	-1.08	0.409616	1
hsa-miR-10b-5p	MIMAT0000254	nmiR03126.1:1	Endogenous1	miRNA	-1.22	0.41072	1
hsa-miR-188-5p	MIMAT0000457	nmiR03242.1:1	Endogenous1	miRNA	-1.08	0.411545	1
hsa-miR-103a-3p	MIMAT0000101	nmiR03182.1:1	Endogenous1	miRNA	-1.07	0.41157	1
hsa-miR-18a-5p	MIMAT0000072	nmiR03133.1:1	Endogenous1	miRNA	-1.15	0.412105	1
hsa-miR-6720-3p	MIMAT0025851	nmiR03998.1:1	Endogenous1	miRNA	-1.1	0.413213	1
RPLP0	NM_001002.3	NM_001002.3:250	Housekeeping	miRNA	1.27	0.413487	1
hsa-miR-1250-5p	MIMAT0005902	nmiR03764.1:1	Endogenous1	miRNA	-1.07	0.415324	1
hsa-miR-506-5p	MIMAT0022701	nmiR03969.1:1	Endogenous1	miRNA	-1.09	0.417515	1
hsa-miR-758-3p+hsa-miR-411-3p	MIMAT0003879	nmiR03678.1:1	Endogenous1	miRNA	-1.12	0.419274	1
hsa-miR-624-3p	MIMAT0004807	nmiR03620.1:1	Endogenous1	miRNA	-1.1	0.420951	1
hsa-miR-744-5p	MIMAT0004945	nmiR03677.1:1	Endogenous1	miRNA	1.08	0.4248	1
hsa-miR-629-5p	MIMAT0004810	nmiR03626.1:1	Endogenous1	miRNA	-1.06	0.427156	1
hsa-miR-3158-3p	MIMAT0015032	nmiR03929.1:1	Endogenous1	miRNA	1.12	0.427532	1
hsa-miR-2116-5p	MIMAT0011160	nmiR03753.1:1	Endogenous1	miRNA	1.08	0.430114	1
hsa-miR-1268b	MIMAT0018925	nmiR03783.1:1	Endogenous1	miRNA	-1.11	0.430643	1
hsa-miR-1285-5p	MIMAT0022719	nmiR03980.1:1	Endogenous1	miRNA	1.22	0.431515	1
hsa-miR-449a	MIMAT0001541	nmiR03388.1:1	Endogenous1	miRNA	-1.1	0.431819	1
hsa-miR-483-5p	MIMAT0004761	nmiR03402.1:1	Endogenous1	miRNA	1.13	0.435302	1
hsa-miR-27b-3p	MIMAT0000419	nmiR03149.1:1	Endogenous1	miRNA	-1.18	0.437692	1
hsa-miR-15a-5p	MIMAT0000068	nmiR03129.1:1	Endogenous1	miRNA	-1.22	0.439647	1
hsa-miR-564	MIMAT0003228	nmiR03558.1:1	Endogenous1	miRNA	-1.07	0.442515	1
hsa-miR-30a-5p	MIMAT0000087	nmiR03156.1:1	Endogenous1	miRNA	-1.27	0.442636	1
hsa-miR-944	MIMAT0004987	nmiR03723.1:1	Endogenous1	miRNA	-1.11	0.443701	1
hsa-miR-5010-5p	MIMAT0021043	nmiR03955.1:1	Endogenous1	miRNA	1.08	0.444177	1
hsa-miR-628-5p	MIMAT0004809	nmiR03625.1:1	Endogenous1	miRNA	-1.08	0.446251	1
hsa-miR-874-3p	MIMAT0004911	nmiR03693.1:1	Endogenous1	miRNA	-1.1	0.446302	1
hsa-miR-29a-3p	MIMAT0000086	nmiR03152.1:1	Endogenous1	miRNA	-1.27	0.447772	1
hsa-miR-556-5p	MIMAT0003220	nmiR03551.1:1	Endogenous1	miRNA	1.09	0.44822	1
hsa-miR-205-5p	MIMAT0000266	nmiR03264.1:1	Endogenous1	miRNA	-1.78	0.448296	1
hsa-miR-514a-5p	MIMAT0022702	nmiR03970.1:1	Endogenous1	miRNA	1.07	0.448457	1
hsa-miR-127-3p	MIMAT0000446	nmiR03192.1:1	Endogenous1	miRNA	-1.22	0.4495	1
hsa-miR-23b-3p	MIMAT0000418	nmiR03142.1:1	Endogenous1	miRNA	-1.2	0.44988	1
hsa-miR-21-5p	MIMAT0000076	nmiR03112.1:1	Endogenous1	miRNA	-1.29	0.452178	1
hsa-miR-3614-3p	MIMAT0017993	nmiR03937.1:1	Endogenous1	miRNA	1.1	0.45273	1
hsa-let-7c-5p	MIMAT0000064	nmiR03115.1:1	Endogenous1	miRNA	1.26	0.455977	1
hsa-miR-339-5p	MIMAT0000764	nmiR03325.1:1	Endogenous1	miRNA	1.08	0.457065	1
hsa-miR-1269b	MIMAT0019059	nmiR03785.1:1	Endogenous1	miRNA	-1.09	0.458022	1
hsa-miR-627-3p	MIMAT0026623	nmiR04017.1:1	Endogenous1	miRNA	1.09	0.460034	1
hsa-miR-370-3p	MIMAT0000722	nmiR03340.1:1	Endogenous1	miRNA	-1.1	0.461219	1
hsa-miR-301a-3p	MIMAT0000688	nmiR03292.1:1	Endogenous1	miRNA	1.11	0.46266	1
hsa-miR-134-3p	MIMAT0026481	nmiR04005.1:1	Endogenous1	miRNA	-1.09	0.462787	1
hsa-miR-769-3p	MIMAT0003887	nmiR03688.1:1	Endogenous1	miRNA	1.11	0.466844	1
hsa-miR-329-3p	MIMAT0001629	nmiR03314.1:1	Endogenous1	miRNA	1.13	0.469067	1
hsa-miR-887-3p	MIMAT0004951	nmiR03701.1:1	Endogenous1	miRNA	-1.08	0.469567	1
hsa-miR-18b-5p	MIMAT0001412	nmiR03134.1:1	Endogenous1	miRNA	-1.09	0.470121	1
hsa-miR-382-3p	MIMAT0022697	nmiR03966.1:1	Endogenous1	miRNA	1.09	0.47125	1
hsa-miR-1298-5p	MIMAT0005800	nmiR03818.1:1	Endogenous1	miRNA	-1.08	0.475923	1
hsa-miR-708-5p	MIMAT0004926	nmiR03673.1:1	Endogenous1	miRNA	-1.14	0.476864	1
hsa-miR-3916	MIMAT0018190	nmiR03939.1:1	Endogenous1	miRNA	-1.1	0.476968	1
hsa-miR-510-5p	MIMAT0002882	nmiR03446.1:1	Endogenous1	miRNA	-1.09	0.478625	1
hsa-miR-182-3p	MIMAT0000260	nmiR03913.1:1	Endogenous1	miRNA	1.09	0.478721	1
hsa-miR-604	MIMAT0003272	nmiR03599.1:1	Endogenous1	miRNA	1.1	0.478834	1
hsa-miR-1908-3p	MIMAT0026916	nmiR04027.1:1	Endogenous1	miRNA	-1.06	0.481193	1
hsa-miR-521	MIMAT0002854	nmiR03485.1:1	Endogenous1	miRNA	1.11	0.481859	1
hsa-miR-615-3p	MIMAT0003283	nmiR03610.1:1	Endogenous1	miRNA	1.09	0.482351	1
hsa-miR-299-5p	MIMAT0002890	nmiR03290.1:1	Endogenous1	miRNA	1.1	0.484462	1
hsa-miR-369-5p	MIMAT0001621	nmiR03339.1:1	Endogenous1	miRNA	-1.09	0.485243	1
hsa-miR-125a-3p	MIMAT0004602	nmiR03121.1:1	Endogenous1	miRNA	-1.06	0.486841	1
hsa-miR-1285-3p	MIMAT0005876	nmiR03805.1:1	Endogenous1	miRNA	1.06	0.487765	1
hsa-miR-1306-5p	MIMAT0022726	nmiR03982.1:1	Endogenous1	miRNA	1.11	0.489189	1
hsa-miR-186-5p	MIMAT0000456	nmiR03239.1:1	Endogenous1	miRNA	-1.12	0.490914	1
hsa-miR-1322	MIMAT0005953	nmiR03828.1:1	Endogenous1	miRNA	-1.09	0.490944	1
hsa-miR-648	MIMAT0003318	nmiR03647.1:1	Endogenous1	miRNA	-1.09	0.492556	1
hsa-miR-151a-5p	MIMAT0004697	nmiR03228.1:1	Endogenous1	miRNA	1.18	0.496415	1
hsa-miR-597-5p	MIMAT0003265	nmiR03433.1:1	Endogenous1	miRNA	1.08	0.497824	1
hsa-miR-548o-3p+hsa-miR-548ah-3p+hsa-miR-548av-3p	MIMAT0005919	nmiR03532.1:1	Endogenous1	miRNA	1.07	0.498224	1
hsa-miR-323b-5p	MIMAT0001630	nmiR03306.1:1	Endogenous1	miRNA	1.09	0.499903	1
hsa-miR-548v	MIMAT0015020	nmiR03537.1:1	Endogenous1	miRNA	1.09	0.501289	1
hsa-miR-495-5p	MIMAT0022924	nmiR03990.1:1	Endogenous1	miRNA	-1.08	0.501985	1
hsa-miR-1255b-5p	MIMAT0005945	nmiR03770.1:1	Endogenous1	miRNA	1.08	0.502039	1
hsa-miR-3144-5p	MIMAT0015014	nmiR03870.1:1	Endogenous1	miRNA	-1.05	0.502275	1
hsa-miR-19a-3p	MIMAT0000073	nmiR03136.1:1	Endogenous1	miRNA	-1.18	0.503476	1
hsa-miR-381-5p	MIMAT0022862	nmiR03989.1:1	Endogenous1	miRNA	1.06	0.504048	1
hsa-miR-154-5p	MIMAT0000452	nmiR03231.1:1	Endogenous1	miRNA	-1.1	0.506403	1
hsa-miR-568	MIMAT0003232	nmiR03561.1:1	Endogenous1	miRNA	1.07	0.509111	1
hsa-miR-1200	MIMAT0005863	nmiR03734.1:1	Endogenous1	miRNA	1.09	0.509952	1
hsa-miR-2110	MIMAT0010133	nmiR03855.1:1	Endogenous1	miRNA	1.07	0.513415	1
hsa-miR-188-3p	MIMAT0004613	nmiR03241.1:1	Endogenous1	miRNA	1.08	0.514225	1
hsa-miR-574-3p	MIMAT0003239	nmiR03565.1:1	Endogenous1	miRNA	1.11	0.517678	1
hsa-miR-582-3p	MIMAT0004797	nmiR03576.1:1	Endogenous1	miRNA	1.08	0.518124	1
hsa-miR-370-5p	MIMAT0026483	nmiR04007.1:1	Endogenous1	miRNA	-1.08	0.519664	1
hsa-miR-514b-5p	MIMAT0015087	nmiR03220.1:1	Endogenous1	miRNA	1.07	0.519892	1
hsa-miR-640	MIMAT0003310	nmiR03637.1:1	Endogenous1	miRNA	-1.06	0.521476	1
hsa-miR-561-3p	MIMAT0003225	nmiR03555.1:1	Endogenous1	miRNA	1.08	0.522583	1
hsa-miR-585-3p	MIMAT0003250	nmiR03581.1:1	Endogenous1	miRNA	1.07	0.522629	1
hsa-miR-3192-5p	MIMAT0015076	nmiR03887.1:1	Endogenous1	miRNA	1.09	0.523199	1
hsa-miR-191-5p	MIMAT0000440	nmiR03245.1:1	Endogenous1	miRNA	1.17	0.523432	1
hsa-miR-33a-5p	MIMAT0000091	nmiR03163.1:1	Endogenous1	miRNA	-1.06	0.53006	1
hsa-miR-1295a	MIMAT0005885	nmiR03815.1:1	Endogenous1	miRNA	1.08	0.534312	1
hsa-miR-320e	MIMAT0015072	nmiR03304.1:1	Endogenous1	miRNA	1.18	0.535812	1
hsa-miR-504-5p	MIMAT0002875	nmiR03437.1:1	Endogenous1	miRNA	1.05	0.536797	1
hsa-miR-378b	MIMAT0014999	nmiR03355.1:1	Endogenous1	miRNA	-1.07	0.53801	1
hsa-miR-548a-5p	MIMAT0004803	nmiR03374.1:1	Endogenous1	miRNA	1.07	0.538571	1
hsa-miR-502-5p	MIMAT0002873	nmiR03434.1:1	Endogenous1	miRNA	1.06	0.539277	1
hsa-miR-302d-3p	MIMAT0000718	nmiR03297.1:1	Endogenous1	miRNA	1.07	0.540456	1
hsa-miR-378h	MIMAT0018984	nmiR03362.1:1	Endogenous1	miRNA	1.07	0.541971	1
hsa-miR-5001-3p	MIMAT0021022	nmiR03954.1:1	Endogenous1	miRNA	-1.07	0.544024	1
hsa-miR-573	MIMAT0003238	nmiR03564.1:1	Endogenous1	miRNA	-1.06	0.544107	1
hsa-miR-641	MIMAT0003311	nmiR03638.1:1	Endogenous1	miRNA	-1.1	0.544941	1
hsa-miR-449c-5p	MIMAT0010251	nmiR03390.1:1	Endogenous1	miRNA	-1.08	0.548783	1
hsa-miR-198	MIMAT0000228	nmiR03254.1:1	Endogenous1	miRNA	-1.09	0.552379	1
hsa-miR-1296-5p	MIMAT0005794	nmiR03816.1:1	Endogenous1	miRNA	1.07	0.553006	1
hsa-miR-544a	MIMAT0003164	nmiR03372.1:1	Endogenous1	miRNA	-1.07	0.555148	1
hsa-miR-6511a-3p	MIMAT0025479	nmiR03997.1:1	Endogenous1	miRNA	-1.05	0.557568	1
hsa-miR-4425	MIMAT0018940	nmiR03901.1:1	Endogenous1	miRNA	-1.07	0.558072	1
hsa-miR-637	MIMAT0003307	nmiR03634.1:1	Endogenous1	miRNA	-1.08	0.559093	1
hsa-miR-508-3p	MIMAT0002880	nmiR03441.1:1	Endogenous1	miRNA	1.08	0.559284	1
hsa-miR-614	MIMAT0003282	nmiR03609.1:1	Endogenous1	miRNA	-1.08	0.561603	1
hsa-miR-1915-3p	MIMAT0007892	nmiR03847.1:1	Endogenous1	miRNA	-1.2	0.562345	1
hsa-miR-4787-3p	MIMAT0019957	nmiR03950.1:1	Endogenous1	miRNA	-1.09	0.562737	1
hsa-miR-190b	MIMAT0004929	nmiR03243.1:1	Endogenous1	miRNA	1.04	0.562975	1
hsa-miR-192-5p	MIMAT0000222	nmiR03137.1:1	Endogenous1	miRNA	1.12	0.565764	1
hsa-miR-339-3p	MIMAT0004702	nmiR03324.1:1	Endogenous1	miRNA	-1.06	0.570376	1
hsa-miR-503-5p	MIMAT0002874	nmiR03435.1:1	Endogenous1	miRNA	-1.09	0.570593	1
hsa-miR-29c-3p	MIMAT0000681	nmiR03155.1:1	Endogenous1	miRNA	-1.18	0.570925	1
hsa-miR-492	MIMAT0002812	nmiR03416.1:1	Endogenous1	miRNA	1.06	0.571547	1
hsa-miR-548i	MIMAT0005935	nmiR03527.1:1	Endogenous1	miRNA	1.06	0.572109	1
hsa-miR-193a-5p+hsa-miR-193b-5p	MIMAT0004614	nmiR03247.1:1	Endogenous1	miRNA	-1.07	0.574265	1
hsa-miR-3130-3p	MIMAT0014994	nmiR03925.1:1	Endogenous1	miRNA	-1.07	0.57795	1
hsa-miR-5010-3p	MIMAT0021044	nmiR03956.1:1	Endogenous1	miRNA	-1.07	0.578179	1
hsa-miR-1-5p	MIMAT0031892	nmiR04032.1:1	Endogenous1	miRNA	-1.07	0.581137	1
hsa-miR-374b-5p	MIMAT0004955	nmiR03349.1:1	Endogenous1	miRNA	-1.13	0.58133	1
hsa-miR-208b-5p	MIMAT0026722	nmiR04022.1:1	Endogenous1	miRNA	1.06	0.584197	1
hsa-miR-509-3-5p	MIMAT0004975	nmiR03443.1:1	Endogenous1	miRNA	-1.05	0.584861	1
hsa-miR-522-3p	MIMAT0002868	nmiR03486.1:1	Endogenous1	miRNA	1.08	0.585465	1
hsa-miR-593-3p	MIMAT0004802	nmiR03590.1:1	Endogenous1	miRNA	1.08	0.586242	1
hsa-miR-300	MIMAT0004903	nmiR03291.1:1	Endogenous1	miRNA	1.05	0.587607	1
hsa-miR-30c-5p	MIMAT0000244	nmiR03158.1:1	Endogenous1	miRNA	1.13	0.589774	1
hsa-miR-548al	MIMAT0019024	nmiR03514.1:1	Endogenous1	miRNA	1.06	0.590447	1
hsa-miR-491-5p	MIMAT0002807	nmiR03415.1:1	Endogenous1	miRNA	1.07	0.592073	1
hsa-miR-301a-5p	MIMAT0022696	nmiR03965.1:1	Endogenous1	miRNA	1.06	0.594261	1
hsa-miR-3605-3p	MIMAT0017982	nmiR03934.1:1	Endogenous1	miRNA	1.05	0.594538	1
hsa-miR-16-5p	MIMAT0000069	nmiR03132.1:1	Endogenous1	miRNA	-1.18	0.594546	1
hsa-miR-661	MIMAT0003324	nmiR03661.1:1	Endogenous1	miRNA	-1.07	0.596748	1
hsa-miR-1226-3p	MIMAT0005577	nmiR03745.1:1	Endogenous1	miRNA	1.04	0.597882	1
hsa-miR-147b	MIMAT0004928	nmiR03221.1:1	Endogenous1	miRNA	-1.08	0.60073	1
hsa-miR-1307-3p	MIMAT0005951	nmiR03826.1:1	Endogenous1	miRNA	-1.07	0.604941	1
hsa-miR-579-5p	MIMAT0026616	nmiR04016.1:1	Endogenous1	miRNA	1.06	0.607347	1
hsa-miR-580-3p	MIMAT0003245	nmiR03574.1:1	Endogenous1	miRNA	1.05	0.608796	1
hsa-miR-942-5p	MIMAT0004985	nmiR03721.1:1	Endogenous1	miRNA	1.07	0.609199	1
hsa-miR-190a-5p	MIMAT0000458	nmiR03244.1:1	Endogenous1	miRNA	-1.04	0.610197	1
hsa-miR-519b-3p	MIMAT0002837	nmiR03470.1:1	Endogenous1	miRNA	1.06	0.611349	1
hsa-miR-802	MIMAT0004185	nmiR03691.1:1	Endogenous1	miRNA	-1.05	0.614391	1
hsa-miR-654-3p	MIMAT0004814	nmiR03653.1:1	Endogenous1	miRNA	1.04	0.61453	1
hsa-miR-643	MIMAT0003313	nmiR03641.1:1	Endogenous1	miRNA	1.06	0.616595	1
hsa-miR-520d-3p	MIMAT0002856	nmiR03479.1:1	Endogenous1	miRNA	1.06	0.620693	1
hsa-miR-324-5p	MIMAT0000761	nmiR03310.1:1	Endogenous1	miRNA	1.14	0.621246	1
hsa-miR-361-3p	MIMAT0004682	nmiR03332.1:1	Endogenous1	miRNA	-1.11	0.622096	1
hsa-miR-4707-5p	MIMAT0019807	nmiR03946.1:1	Endogenous1	miRNA	-1.05	0.622329	1
hsa-miR-876-5p	MIMAT0004924	nmiR03697.1:1	Endogenous1	miRNA	-1.06	0.623518	1
hsa-miR-510-3p	MIMAT0026613	nmiR04014.1:1	Endogenous1	miRNA	-1.06	0.623787	1
hsa-miR-651-3p	MIMAT0026624	nmiR04018.1:1	Endogenous1	miRNA	1.04	0.624015	1
hsa-miR-485-3p	MIMAT0002176	nmiR03404.1:1	Endogenous1	miRNA	1.13	0.62411	1
hsa-miR-133b	MIMAT0000770	nmiR03201.1:1	Endogenous1	miRNA	1.09	0.627092	1
hsa-miR-526a+hsa-miR-518c-5p+hsa-miR-518d-5p	MIMAT0002845	nmiR03493.1:1	Endogenous1	miRNA	1.05	0.627944	1
hsa-miR-1258	MIMAT0005909	nmiR03773.1:1	Endogenous1	miRNA	-1.04	0.628267	1
hsa-miR-1254	MIMAT0005905	nmiR03768.1:1	Endogenous1	miRNA	1.07	0.629268	1
hsa-miR-513c-3p	MIMAT0022728	nmiR03984.1:1	Endogenous1	miRNA	-1.06	0.632031	1
hsa-miR-193b-3p	MIMAT0002819	nmiR03248.1:1	Endogenous1	miRNA	1.1	0.632113	1
hsa-miR-620	MIMAT0003289	nmiR03616.1:1	Endogenous1	miRNA	-1.06	0.632398	1
hsa-miR-29b-3p	MIMAT0000100	nmiR03153.1:1	Endogenous1	miRNA	-1.19	0.632499	1
hsa-miR-940	MIMAT0004983	nmiR03719.1:1	Endogenous1	miRNA	-1.08	0.632893	1
hsa-miR-626	MIMAT0003295	nmiR03622.1:1	Endogenous1	miRNA	1.06	0.633049	1
hsa-miR-146b-3p	MIMAT0004766	nmiR03218.1:1	Endogenous1	miRNA	-1.04	0.633542	1
hsa-miR-1245b-5p	MIMAT0019950	nmiR03759.1:1	Endogenous1	miRNA	-1.05	0.633903	1
hsa-miR-3180-3p	MIMAT0015058	nmiR03879.1:1	Endogenous1	miRNA	1.05	0.636761	1
hsa-miR-23c	MIMAT0018000	nmiR03143.1:1	Endogenous1	miRNA	-1.06	0.638776	1
hsa-miR-24-3p	MIMAT0000080	nmiR03144.1:1	Endogenous1	miRNA	-1.14	0.640869	1
hsa-miR-374a-3p	MIMAT0004688	nmiR03924.1:1	Endogenous1	miRNA	1.05	0.641786	1
hsa-miR-302a-3p	MIMAT0000684	nmiR03294.1:1	Endogenous1	miRNA	-1.05	0.642049	1
hsa-miR-664b-3p	MIMAT0022272	nmiR03962.1:1	Endogenous1	miRNA	1.08	0.643255	1
hsa-miR-301b-5p	MIMAT0032026	nmiR04034.1:1	Endogenous1	miRNA	1.05	0.64429	1
hsa-miR-590-5p	MIMAT0003258	nmiR03587.1:1	Endogenous1	miRNA	1.07	0.644542	1
hsa-miR-134-5p+hsa-miR-6728-5p	MIMAT0000447	nmiR03202.1:1	Endogenous1	miRNA	-1.06	0.646765	1
hsa-miR-1268a	MIMAT0005922	nmiR03784.1:1	Endogenous1	miRNA	1.09	0.647336	1
hsa-miR-1908-5p	MIMAT0007881	nmiR03840.1:1	Endogenous1	miRNA	1.06	0.649533	1
hsa-miR-1255a	MIMAT0005906	nmiR03769.1:1	Endogenous1	miRNA	1.05	0.650163	1
hsa-miR-1272	MIMAT0005925	nmiR03789.1:1	Endogenous1	miRNA	-1.06	0.651872	1
hsa-miR-675-5p	MIMAT0004284	nmiR03672.1:1	Endogenous1	miRNA	1.05	0.65417	1
hsa-miR-2682-5p	MIMAT0013517	nmiR03864.1:1	Endogenous1	miRNA	-1.04	0.655356	1
hsa-miR-6721-5p	MIMAT0025852	nmiR03999.1:1	Endogenous1	miRNA	1.05	0.657426	1
hsa-miR-591	MIMAT0003259	nmiR03588.1:1	Endogenous1	miRNA	-1.05	0.659333	1
hsa-miR-194-5p	MIMAT0000460	nmiR03249.1:1	Endogenous1	miRNA	1.17	0.66099	1
hsa-miR-1233-3p	MIMAT0005588	nmiR03750.1:1	Endogenous1	miRNA	-1.05	0.662034	1
hsa-miR-187-3p	MIMAT0000262	nmiR03240.1:1	Endogenous1	miRNA	1.05	0.662233	1
LIG_NEG_C	nmiR00803.1	nmiR00803.1:1	Ligation	miRNA	-1.04	0.663089	1
hsa-miR-212-3p	MIMAT0000269	nmiR03271.1:1	Endogenous1	miRNA	1.04	0.665768	1
hsa-miR-6511a-5p	MIMAT0025478	nmiR03996.1:1	Endogenous1	miRNA	-1.06	0.667269	1
hsa-miR-141-3p	MIMAT0000432	nmiR03212.1:1	Endogenous1	miRNA	-1.17	0.667389	1
hsa-miR-767-5p	MIMAT0003882	nmiR03687.1:1	Endogenous1	miRNA	1.05	0.668012	1
hsa-miR-518e-3p	MIMAT0002861	nmiR03468.1:1	Endogenous1	miRNA	-1.06	0.668877	1
hsa-miR-671-5p	MIMAT0003880	nmiR03671.1:1	Endogenous1	miRNA	1.04	0.669104	1
hsa-miR-922	MIMAT0004972	nmiR03710.1:1	Endogenous1	miRNA	-1.05	0.669849	1
hsa-miR-519c-3p	MIMAT0002832	nmiR03472.1:1	Endogenous1	miRNA	1.06	0.672128	1
hsa-miR-507	MIMAT0002879	nmiR03440.1:1	Endogenous1	miRNA	-1.05	0.673486	1
hsa-miR-1290	MIMAT0005880	nmiR03810.1:1	Endogenous1	miRNA	-1.08	0.67521	1
hsa-miR-519d-3p	MIMAT0002853	nmiR03473.1:1	Endogenous1	miRNA	1.05	0.676505	1
hsa-miR-584-3p	MIMAT0022708	nmiR03973.1:1	Endogenous1	miRNA	1.04	0.68015	1
hsa-miR-203a-5p	MIMAT0031890	nmiR04031.1:1	Endogenous1	miRNA	1.05	0.680522	1
hsa-miR-1281	MIMAT0005939	nmiR03802.1:1	Endogenous1	miRNA	-1.04	0.681612	1
hsa-miR-1271-5p	MIMAT0005796	nmiR03788.1:1	Endogenous1	miRNA	-1.05	0.682786	1
hsa-miR-4536-3p	MIMAT0020959	nmiR03952.1:1	Endogenous1	miRNA	1.05	0.682833	1
hsa-miR-342-5p	MIMAT0004694	nmiR03329.1:1	Endogenous1	miRNA	-1.04	0.683837	1
hsa-miR-181a-2-3p	MIMAT0004558	nmiR03920.1:1	Endogenous1	miRNA	-1.04	0.684555	1
hsa-miR-619-3p	MIMAT0003288	nmiR03615.1:1	Endogenous1	miRNA	1.04	0.684583	1
hsa-miR-548h-5p	MIMAT0005928	nmiR03526.1:1	Endogenous1	miRNA	1.06	0.68605	1
hsa-miR-1224-3p	MIMAT0005459	nmiR03742.1:1	Endogenous1	miRNA	1.05	0.686272	1
hsa-miR-369-3p	MIMAT0000721	nmiR03338.1:1	Endogenous1	miRNA	-1.05	0.68742	1
hsa-miR-1306-3p	MIMAT0005950	nmiR03825.1:1	Endogenous1	miRNA	-1.04	0.688815	1
hsa-miR-509-3p	MIMAT0002881	nmiR03444.1:1	Endogenous1	miRNA	-1.08	0.689112	1
hsa-miR-548k	MIMAT0005882	nmiR03528.1:1	Endogenous1	miRNA	-1.05	0.689436	1
hsa-miR-638	MIMAT0003308	nmiR03635.1:1	Endogenous1	miRNA	-1.07	0.692012	1
hsa-miR-3147	MIMAT0015019	nmiR03871.1:1	Endogenous1	miRNA	-1.05	0.695744	1
hsa-miR-764	MIMAT0010367	nmiR03683.1:1	Endogenous1	miRNA	-1.05	0.700041	1
hsa-miR-381-3p	MIMAT0000736	nmiR03365.1:1	Endogenous1	miRNA	-1.06	0.703008	1
hsa-miR-382-5p	MIMAT0000737	nmiR03366.1:1	Endogenous1	miRNA	-1.11	0.70348	1
hsa-miR-4284	MIMAT0016915	nmiR03898.1:1	Endogenous1	miRNA	1.07	0.703775	1
hsa-miR-1288-3p	MIMAT0005942	nmiR03808.1:1	Endogenous1	miRNA	1.03	0.704682	1
hsa-miR-571	MIMAT0003236	nmiR03562.1:1	Endogenous1	miRNA	-1.05	0.707414	1
hsa-miR-25-3p	MIMAT0000081	nmiR03145.1:1	Endogenous1	miRNA	-1.12	0.707546	1
hsa-miR-3127-5p	MIMAT0014990	nmiR03866.1:1	Endogenous1	miRNA	-1.08	0.708246	1
hsa-miR-346	MIMAT0000773	nmiR03331.1:1	Endogenous1	miRNA	1.04	0.709358	1
hsa-miR-523-3p	MIMAT0002840	nmiR03487.1:1	Endogenous1	miRNA	1.06	0.714865	1
hsa-miR-215-5p	MIMAT0000272	nmiR03273.1:1	Endogenous1	miRNA	1.06	0.717649	1
hsa-miR-1301-3p	MIMAT0005797	nmiR03820.1:1	Endogenous1	miRNA	-1.05	0.720458	1
hsa-miR-3065-5p	MIMAT0015066	nmiR03931.1:1	Endogenous1	miRNA	-1.04	0.720752	1
hsa-miR-520g-3p	MIMAT0002858	nmiR03483.1:1	Endogenous1	miRNA	1.05	0.721039	1
hsa-miR-296-3p	MIMAT0004679	nmiR03285.1:1	Endogenous1	miRNA	-1.05	0.723949	1
hsa-miR-151a-3p	MIMAT0000757	nmiR03227.1:1	Endogenous1	miRNA	1.05	0.724272	1
hsa-miR-1246	MIMAT0005898	nmiR03503.1:1	Endogenous1	miRNA	-1.13	0.724298	1
hsa-miR-562	MIMAT0003226	nmiR03556.1:1	Endogenous1	miRNA	-1.04	0.724305	1
hsa-miR-365a-3p+hsa-miR-365b-3p	MIMAT0000710	nmiR03337.1:1	Endogenous1	miRNA	1.07	0.72464	1
hsa-miR-574-5p	MIMAT0004795	nmiR03566.1:1	Endogenous1	miRNA	-1.05	0.724991	1
hsa-miR-302c-3p	MIMAT0000717	nmiR03296.1:1	Endogenous1	miRNA	-1.04	0.725012	1
hsa-miR-563	MIMAT0003227	nmiR03557.1:1	Endogenous1	miRNA	-1.04	0.72614	1
hsa-miR-499b-5p	MIMAT0019897	nmiR03425.1:1	Endogenous1	miRNA	1.03	0.726409	1
hsa-miR-548j-5p	MIMAT0005875	nmiR03396.1:1	Endogenous1	miRNA	-1.03	0.727005	1
hsa-miR-181d-3p	MIMAT0026608	nmiR04012.1:1	Endogenous1	miRNA	1.05	0.727817	1
hsa-miR-514b-3p	MIMAT0015088	nmiR03455.1:1	Endogenous1	miRNA	1.04	0.729583	1
hsa-miR-320c	MIMAT0005793	nmiR03302.1:1	Endogenous1	miRNA	1.03	0.730143	1
hsa-miR-576-3p	MIMAT0004796	nmiR03568.1:1	Endogenous1	miRNA	1.04	0.73322	1
hsa-miR-211-3p	MIMAT0022694	nmiR03964.1:1	Endogenous1	miRNA	-1.05	0.734215	1
hsa-miR-384	MIMAT0001075	nmiR03368.1:1	Endogenous1	miRNA	-1.03	0.736619	1
hsa-miR-450b-3p	MIMAT0004910	nmiR03392.1:1	Endogenous1	miRNA	-1.04	0.738967	1
hsa-miR-660-3p	MIMAT0022711	nmiR03975.1:1	Endogenous1	miRNA	1.03	0.739254	1
hsa-miR-517a-3p	MIMAT0002852	nmiR03461.1:1	Endogenous1	miRNA	1.04	0.741501	1
hsa-miR-20a-5p+hsa-miR-20b-5p	MIMAT0000075	nmiR03139.1:1	Endogenous1	miRNA	-1.09	0.741947	1
hsa-miR-575	MIMAT0003240	nmiR03567.1:1	Endogenous1	miRNA	-1.08	0.744186	1
hsa-miR-1205	MIMAT0005869	nmiR03738.1:1	Endogenous1	miRNA	-1.04	0.74465	1
hsa-miR-600	MIMAT0003268	nmiR03595.1:1	Endogenous1	miRNA	1.03	0.746386	1
hsa-miR-324-3p	MIMAT0000762	nmiR03309.1:1	Endogenous1	miRNA	1.03	0.749222	1
hsa-miR-542-5p	MIMAT0003340	nmiR03500.1:1	Endogenous1	miRNA	1.03	0.750629	1
hsa-miR-4421	MIMAT0018934	nmiR03900.1:1	Endogenous1	miRNA	1.03	0.75069	1
hsa-miR-130b-3p	MIMAT0000691	nmiR03198.1:1	Endogenous1	miRNA	1.08	0.752784	1
hsa-miR-548ak	MIMAT0019013	nmiR03513.1:1	Endogenous1	miRNA	-1.04	0.753984	1
hsa-miR-548y	MIMAT0018354	nmiR03540.1:1	Endogenous1	miRNA	1.04	0.757299	1
hsa-miR-3065-3p	MIMAT0015378	nmiR03933.1:1	Endogenous1	miRNA	-1.04	0.760667	1
hsa-miR-1270	MIMAT0005924	nmiR03787.1:1	Endogenous1	miRNA	1.03	0.761377	1
hsa-miR-5196-5p	MIMAT0021128	nmiR03957.1:1	Endogenous1	miRNA	-1.03	0.762041	1
hsa-miR-1203	MIMAT0005866	nmiR03736.1:1	Endogenous1	miRNA	-1.03	0.762355	1
hsa-miR-383-5p	MIMAT0000738	nmiR03367.1:1	Endogenous1	miRNA	1.03	0.762944	1
hsa-miR-4647	MIMAT0019709	nmiR03578.1:1	Endogenous1	miRNA	1.04	0.764136	1
hsa-miR-1264	MIMAT0005791	nmiR03779.1:1	Endogenous1	miRNA	1.03	0.764919	1
hsa-miR-543	MIMAT0004954	nmiR03501.1:1	Endogenous1	miRNA	1.06	0.767648	1
hsa-miR-520b	MIMAT0002843	nmiR03477.1:1	Endogenous1	miRNA	-1.05	0.768327	1
hsa-miR-1245a	MIMAT0005897	nmiR03760.1:1	Endogenous1	miRNA	-1.04	0.768393	1
hsa-miR-325	MIMAT0000771	nmiR03311.1:1	Endogenous1	miRNA	1.03	0.769735	1
hsa-miR-513a-3p	MIMAT0004777	nmiR03450.1:1	Endogenous1	miRNA	1.03	0.771742	1
hsa-miR-15b-5p	MIMAT0000417	nmiR03131.1:1	Endogenous1	miRNA	1.08	0.771942	1
hsa-let-7f-5p	MIMAT0000067	nmiR03118.1:1	Endogenous1	miRNA	1.08	0.772336	1
hsa-miR-3928-3p	MIMAT0018205	nmiR03896.1:1	Endogenous1	miRNA	-1.03	0.77254	1
hsa-miR-651-5p	MIMAT0003321	nmiR03650.1:1	Endogenous1	miRNA	1.02	0.772929	1
hsa-miR-1248	MIMAT0005900	nmiR03762.1:1	Endogenous1	miRNA	1.02	0.773182	1
hsa-miR-122-5p	MIMAT0000421	nmiR03187.1:1	Endogenous1	miRNA	1.03	0.773355	1
hsa-miR-516b-5p	MIMAT0002859	nmiR03460.1:1	Endogenous1	miRNA	-1.03	0.773651	1
hsa-miR-409-5p	MIMAT0001638	nmiR03370.1:1	Endogenous1	miRNA	-1.05	0.773798	1
hsa-miR-208b-3p	MIMAT0004960	nmiR03267.1:1	Endogenous1	miRNA	-1.03	0.773982	1
hsa-miR-330-3p	MIMAT0000751	nmiR03315.1:1	Endogenous1	miRNA	1.03	0.777424	1
hsa-miR-200c-3p	MIMAT0000617	nmiR03260.1:1	Endogenous1	miRNA	1.13	0.777766	1
hsa-miR-3613-3p	MIMAT0017991	nmiR03936.1:1	Endogenous1	miRNA	1.03	0.779354	1
hsa-miR-596	MIMAT0003264	nmiR03592.1:1	Endogenous1	miRNA	1.06	0.779529	1
hsa-miR-1827	MIMAT0006767	nmiR03839.1:1	Endogenous1	miRNA	1.03	0.779914	1
hsa-miR-1228-3p	MIMAT0005583	nmiR03747.1:1	Endogenous1	miRNA	1.03	0.78088	1
hsa-miR-1249-5p	MIMAT0032029	nmiR04035.1:1	Endogenous1	miRNA	-1.03	0.781411	1
hsa-miR-429	MIMAT0001536	nmiR03383.1:1	Endogenous1	miRNA	1.1	0.783019	1
hsa-miR-3690	MIMAT0018119	nmiR03895.1:1	Endogenous1	miRNA	1.03	0.783546	1
hsa-miR-1185-5p	MIMAT0005798	nmiR03731.1:1	Endogenous1	miRNA	1.03	0.78374	1
hsa-miR-665	MIMAT0004952	nmiR03666.1:1	Endogenous1	miRNA	-1.03	0.785103	1
hsa-miR-302b-3p	MIMAT0000715	nmiR03295.1:1	Endogenous1	miRNA	-1.02	0.78698	1
hsa-miR-1286	MIMAT0005877	nmiR03806.1:1	Endogenous1	miRNA	1.03	0.787532	1
hsa-miR-508-5p	MIMAT0004778	nmiR03442.1:1	Endogenous1	miRNA	1.04	0.7889	1
hsa-miR-548m	MIMAT0005917	nmiR03530.1:1	Endogenous1	miRNA	1.03	0.789266	1
hsa-miR-378d	MIMAT0018926	nmiR03358.1:1	Endogenous1	miRNA	-1.03	0.790409	1
hsa-miR-432-5p	MIMAT0002814	nmiR03385.1:1	Endogenous1	miRNA	-1.08	0.793716	1
hsa-miR-33b-5p	MIMAT0003301	nmiR03164.1:1	Endogenous1	miRNA	-1.03	0.793824	1
hsa-miR-766-3p	MIMAT0003888	nmiR03685.1:1	Endogenous1	miRNA	1.02	0.795779	1
hsa-miR-3074-3p	MIMAT0015027	nmiR03928.1:1	Endogenous1	miRNA	-1.02	0.796637	1
hsa-miR-190a-3p	MIMAT0026482	nmiR04006.1:1	Endogenous1	miRNA	-1.02	0.798879	1
hsa-miR-409-3p	MIMAT0001639	nmiR03369.1:1	Endogenous1	miRNA	1.07	0.799513	1
hsa-miR-525-3p	MIMAT0002839	nmiR03491.1:1	Endogenous1	miRNA	-1.05	0.80211	1
hsa-miR-3605-5p	MIMAT0017981	nmiR03892.1:1	Endogenous1	miRNA	-1.03	0.803117	1
hsa-miR-532-3p	MIMAT0004780	nmiR03495.1:1	Endogenous1	miRNA	-1.02	0.804833	1
hsa-miR-548ai+hsa-miR-570-5p	MIMAT0018989	nmiR03379.1:1	Endogenous1	miRNA	1.03	0.805783	1
hsa-miR-378f	MIMAT0018932	nmiR03360.1:1	Endogenous1	miRNA	1.02	0.806049	1
hsa-miR-548e-5p	MIMAT0026736	nmiR04024.1:1	Endogenous1	miRNA	1.03	0.80673	1
hsa-miR-1910-3p	MIMAT0026917	nmiR04028.1:1	Endogenous1	miRNA	1.02	0.807263	1
hsa-miR-1224-5p	MIMAT0005458	nmiR03452.1:1	Endogenous1	miRNA	1.04	0.808239	1
hsa-miR-935	MIMAT0004978	nmiR03714.1:1	Endogenous1	miRNA	-1.02	0.8132	1
hsa-miR-552-3p	MIMAT0003215	nmiR03546.1:1	Endogenous1	miRNA	-1.03	0.814923	1
hsa-miR-1910-5p	MIMAT0007884	nmiR03842.1:1	Endogenous1	miRNA	-1.03	0.815524	1
hsa-miR-3180-5p	MIMAT0015057	nmiR03880.1:1	Endogenous1	miRNA	1.02	0.816658	1
hsa-miR-363-3p	MIMAT0000707	nmiR03336.1:1	Endogenous1	miRNA	1.03	0.817042	1
hsa-miR-30b-5p	MIMAT0000420	nmiR03157.1:1	Endogenous1	miRNA	1.08	0.818328	1
hsa-miR-301b-3p	MIMAT0004958	nmiR03293.1:1	Endogenous1	miRNA	1.03	0.82054	1
hsa-miR-504-3p	MIMAT0026612	nmiR04013.1:1	Endogenous1	miRNA	-1.02	0.82107	1
hsa-miR-607	MIMAT0003275	nmiR03602.1:1	Endogenous1	miRNA	-1.03	0.821535	1
hsa-miR-99a-5p	MIMAT0000097	nmiR03177.1:1	Endogenous1	miRNA	1.06	0.822015	1
hsa-miR-93-5p	MIMAT0000093	nmiR03172.1:1	Endogenous1	miRNA	1.07	0.825346	1
hsa-let-7d-5p	MIMAT0000065	nmiR03116.1:1	Endogenous1	miRNA	1.07	0.826778	1
RPL19	NM_000981.3	NM_000981.3:315	Housekeeping	miRNA	-1.05	0.827201	1
hsa-miR-554	MIMAT0003217	nmiR03548.1:1	Endogenous1	miRNA	1.02	0.827592	1
hsa-miR-320d	MIMAT0006764	nmiR03303.1:1	Endogenous1	miRNA	-1.03	0.82884	1
hsa-miR-376a-2-5p	MIMAT0022928	nmiR03992.1:1	Endogenous1	miRNA	1.03	0.829053	1
hsa-miR-3614-5p	MIMAT0017992	nmiR03893.1:1	Endogenous1	miRNA	-1.03	0.832004	1
hsa-miR-3182	MIMAT0015062	nmiR03882.1:1	Endogenous1	miRNA	1.02	0.836179	1
hsa-miR-221-3p	MIMAT0000278	nmiR03281.1:1	Endogenous1	miRNA	-1.05	0.837202	1
hsa-miR-548e-3p	MIMAT0005874	nmiR03523.1:1	Endogenous1	miRNA	-1.02	0.837626	1
hsa-miR-542-3p	MIMAT0003389	nmiR03499.1:1	Endogenous1	miRNA	-1.03	0.837974	1
hsa-miR-184	MIMAT0000454	nmiR03237.1:1	Endogenous1	miRNA	1.02	0.844702	1
hsa-miR-4787-5p	MIMAT0019956	nmiR03949.1:1	Endogenous1	miRNA	-1.02	0.844941	1
hsa-miR-431-5p	MIMAT0001625	nmiR03384.1:1	Endogenous1	miRNA	-1.06	0.846321	1
hsa-miR-127-5p	MIMAT0004604	nmiR03193.1:1	Endogenous1	miRNA	-1.02	0.847198	1
hsa-miR-4524a-5p	MIMAT0019062	nmiR03942.1:1	Endogenous1	miRNA	1.02	0.848033	1
hsa-miR-484	MIMAT0002174	nmiR03403.1:1	Endogenous1	miRNA	-1.02	0.848321	1
hsa-miR-138-5p	MIMAT0000430	nmiR03207.1:1	Endogenous1	miRNA	1.02	0.848471	1
hsa-miR-487b-5p	MIMAT0026614	nmiR04015.1:1	Endogenous1	miRNA	-1.02	0.84856	1
hsa-miR-486-3p	MIMAT0004762	nmiR03406.1:1	Endogenous1	miRNA	-1.03	0.848857	1
hsa-miR-450b-5p	MIMAT0004909	nmiR03393.1:1	Endogenous1	miRNA	1.02	0.85138	1
hsa-let-7b-5p	MIMAT0000063	nmiR03114.1:1	Endogenous1	miRNA	1.05	0.853002	1
hsa-miR-1307-5p	MIMAT0022727	nmiR03983.1:1	Endogenous1	miRNA	-1.02	0.854751	1
hsa-miR-933	MIMAT0004976	nmiR03712.1:1	Endogenous1	miRNA	-1.02	0.860077	1
hsa-miR-328-5p	MIMAT0026486	nmiR04008.1:1	Endogenous1	miRNA	-1.02	0.86166	1
hsa-miR-598-3p	MIMAT0003266	nmiR03593.1:1	Endogenous1	miRNA	1.02	0.866611	1
hsa-miR-330-5p	MIMAT0004693	nmiR03316.1:1	Endogenous1	miRNA	1.02	0.866724	1
hsa-miR-548ar-3p	MIMAT0022266	nmiR03960.1:1	Endogenous1	miRNA	1.02	0.870282	1
hsa-miR-3131	MIMAT0014996	nmiR03867.1:1	Endogenous1	miRNA	-1.02	0.871247	1
hsa-miR-1302	MIMAT0005890	nmiR03821.1:1	Endogenous1	miRNA	1.02	0.873485	1
hsa-miR-376c-5p	MIMAT0022861	nmiR03988.1:1	Endogenous1	miRNA	-1.02	0.873766	1
hsa-miR-513b-5p	MIMAT0005788	nmiR03453.1:1	Endogenous1	miRNA	-1.02	0.874045	1
hsa-miR-766-5p	MIMAT0022714	nmiR03978.1:1	Endogenous1	miRNA	-1.02	0.874697	1
hsa-miR-1204	MIMAT0005868	nmiR03737.1:1	Endogenous1	miRNA	-1.02	0.874919	1
hsa-miR-144-3p	MIMAT0000436	nmiR03215.1:1	Endogenous1	miRNA	-1.04	0.876548	1
hsa-miR-505-3p	MIMAT0002876	nmiR03438.1:1	Endogenous1	miRNA	1.02	0.879234	1
hsa-miR-4451	MIMAT0018973	nmiR03906.1:1	Endogenous1	miRNA	-1.02	0.879256	1
hsa-miR-506-3p	MIMAT0002878	nmiR03439.1:1	Endogenous1	miRNA	1.02	0.880067	1
hsa-miR-196b-5p	MIMAT0001080	nmiR03252.1:1	Endogenous1	miRNA	1.04	0.880091	1
hsa-miR-1303	MIMAT0005891	nmiR03822.1:1	Endogenous1	miRNA	1.03	0.881072	1
hsa-miR-548ad-3p	MIMAT0018946	nmiR03508.1:1	Endogenous1	miRNA	1.02	0.884056	1
hsa-miR-1183	MIMAT0005828	nmiR03729.1:1	Endogenous1	miRNA	1.01	0.88425	1
hsa-miR-196a-5p	MIMAT0000226	nmiR03251.1:1	Endogenous1	miRNA	1.06	0.884922	1
hsa-miR-545-3p	MIMAT0003165	nmiR03504.1:1	Endogenous1	miRNA	1.01	0.885263	1
hsa-miR-501-3p	MIMAT0004774	nmiR03431.1:1	Endogenous1	miRNA	1.02	0.886458	1
hsa-miR-1197	MIMAT0005955	nmiR03733.1:1	Endogenous1	miRNA	-1.02	0.88652	1
hsa-miR-942-3p	MIMAT0026734	nmiR04023.1:1	Endogenous1	miRNA	1.02	0.886925	1
hsa-miR-5196-3p+hsa-miR-6732-3p	MIMAT0021129	nmiR03958.1:1	Endogenous1	miRNA	-1.02	0.887292	1
hsa-miR-98-5p	MIMAT0000096	nmiR03175.1:1	Endogenous1	miRNA	-1.04	0.888921	1
hsa-miR-499b-3p	MIMAT0019898	nmiR03424.1:1	Endogenous1	miRNA	1.02	0.891708	1
hsa-miR-30d-5p	MIMAT0000245	nmiR03159.1:1	Endogenous1	miRNA	-1.04	0.894211	1
hsa-miR-494-5p	MIMAT0026607	nmiR04011.1:1	Endogenous1	miRNA	-1.01	0.895557	1
hsa-miR-200b-3p	MIMAT0000318	nmiR03259.1:1	Endogenous1	miRNA	-1.06	0.895622	1
hsa-miR-298	MIMAT0004901	nmiR03288.1:1	Endogenous1	miRNA	1.01	0.896915	1
hsa-miR-345-3p	MIMAT0022698	nmiR03967.1:1	Endogenous1	miRNA	1.02	0.897322	1
hsa-miR-1305	MIMAT0005893	nmiR03824.1:1	Endogenous1	miRNA	-1.02	0.897614	1
hsa-miR-379-5p	MIMAT0000733	nmiR03363.1:1	Endogenous1	miRNA	1.02	0.898163	1
hsa-miR-1262	MIMAT0005914	nmiR03777.1:1	Endogenous1	miRNA	-1.02	0.89896	1
hsa-miR-25-5p	MIMAT0004498	nmiR03918.1:1	Endogenous1	miRNA	-1.01	0.898973	1
hsa-miR-887-5p	MIMAT0026720	nmiR04021.1:1	Endogenous1	miRNA	-1.02	0.899255	1
hsa-miR-200a-3p	MIMAT0000682	nmiR03258.1:1	Endogenous1	miRNA	-1.04	0.900472	1
hsa-miR-133a-5p	MIMAT0026478	nmiR04003.1:1	Endogenous1	miRNA	1.01	0.900543	1
hsa-miR-2113	MIMAT0009206	nmiR03856.1:1	Endogenous1	miRNA	-1.01	0.901378	1
hsa-miR-551b-3p	MIMAT0003233	nmiR03545.1:1	Endogenous1	miRNA	-1.01	0.902377	1
hsa-miR-1287-3p	MIMAT0026738	nmiR04026.1:1	Endogenous1	miRNA	1.01	0.902676	1
hsa-miR-1296-3p	MIMAT0026637	nmiR04019.1:1	Endogenous1	miRNA	1.01	0.902886	1
ACTB	NM_001101.2	NM_001101.2:1010	Housekeeping	miRNA	-1.04	0.903735	1
hsa-miR-512-5p	MIMAT0002822	nmiR03449.1:1	Endogenous1	miRNA	1.02	0.907542	1
hsa-miR-1249-3p	MIMAT0005901	nmiR03763.1:1	Endogenous1	miRNA	-1.01	0.908688	1
hsa-miR-941	MIMAT0004984	nmiR03720.1:1	Endogenous1	miRNA	1.01	0.909098	1
hsa-miR-4485-3p	MIMAT0019019	nmiR03170.1:1	Endogenous1	miRNA	-1.01	0.911197	1
hsa-miR-572	MIMAT0003237	nmiR03563.1:1	Endogenous1	miRNA	-1.01	0.911559	1
hsa-miR-299-3p	MIMAT0000687	nmiR03289.1:1	Endogenous1	miRNA	-1.01	0.91309	1
hsa-miR-561-5p	MIMAT0022706	nmiR03972.1:1	Endogenous1	miRNA	1.01	0.913997	1
hsa-miR-451a	MIMAT0001631	nmiR03394.1:1	Endogenous1	miRNA	-1.05	0.914078	1
hsa-miR-1287-5p	MIMAT0005878	nmiR03807.1:1	Endogenous1	miRNA	-1.01	0.914972	1
hsa-miR-4792	MIMAT0019964	nmiR03668.1:1	Endogenous1	miRNA	-1.01	0.91697	1
hsa-miR-216a-5p	MIMAT0000273	nmiR03274.1:1	Endogenous1	miRNA	-1.01	0.918138	1
hsa-miR-323b-3p	MIMAT0015050	nmiR03305.1:1	Endogenous1	miRNA	1.01	0.918283	1
hsa-miR-219b-3p	MIMAT0019748	nmiR03945.1:1	Endogenous1	miRNA	-1.01	0.918675	1
hsa-miR-5001-5p	MIMAT0021021	nmiR03953.1:1	Endogenous1	miRNA	1.01	0.919375	1
hsa-miR-590-3p	MIMAT0004801	nmiR03586.1:1	Endogenous1	miRNA	-1.01	0.923229	1
hsa-miR-652-3p	MIMAT0003322	nmiR03651.1:1	Endogenous1	miRNA	1.01	0.923539	1
hsa-miR-1234-3p	MIMAT0005589	nmiR03751.1:1	Endogenous1	miRNA	-1.01	0.923894	1
hsa-miR-106b-5p	MIMAT0000680	nmiR03185.1:1	Endogenous1	miRNA	1.02	0.924084	1
hsa-miR-892b	MIMAT0004918	nmiR03707.1:1	Endogenous1	miRNA	-1.01	0.924228	1
hsa-miR-924	MIMAT0004974	nmiR03711.1:1	Endogenous1	miRNA	1.01	0.924779	1
hsa-miR-1297	MIMAT0005886	nmiR03817.1:1	Endogenous1	miRNA	1.01	0.92574	1
hsa-miR-27a-3p	MIMAT0000084	nmiR03148.1:1	Endogenous1	miRNA	1.01	0.925803	1
hsa-miR-449b-5p	MIMAT0003327	nmiR03389.1:1	Endogenous1	miRNA	1.01	0.926671	1
hsa-miR-135b-5p	MIMAT0000758	nmiR03204.1:1	Endogenous1	miRNA	-1.04	0.926943	1
hsa-miR-361-5p	MIMAT0000703	nmiR03333.1:1	Endogenous1	miRNA	1.02	0.93068	1
hsa-miR-511-5p	MIMAT0002808	nmiR03447.1:1	Endogenous1	miRNA	-1.01	0.931875	1
hsa-miR-487a-3p	MIMAT0002178	nmiR03407.1:1	Endogenous1	miRNA	1.02	0.931979	1
hsa-miR-664a-3p	MIMAT0005949	nmiR03665.1:1	Endogenous1	miRNA	-1.01	0.932974	1
hsa-miR-197-5p	MIMAT0022691	nmiR03963.1:1	Endogenous1	miRNA	1.01	0.933256	1
hsa-miR-517c-3p+hsa-miR-519a-3p	MIMAT0002866	nmiR03463.1:1	Endogenous1	miRNA	1.01	0.937507	1
hsa-miR-450a-1-3p	MIMAT0022700	nmiR03968.1:1	Endogenous1	miRNA	-1.01	0.94002	1
hsa-miR-181b-5p+hsa-miR-181d-5p	MIMAT0000257	nmiR03233.1:1	Endogenous1	miRNA	-1.01	0.941014	1
hsa-miR-628-3p	MIMAT0003297	nmiR03624.1:1	Endogenous1	miRNA	1.01	0.942605	1
hsa-miR-448	MIMAT0001532	nmiR03387.1:1	Endogenous1	miRNA	-1.01	0.942669	1
hsa-miR-520c-3p	MIMAT0002846	nmiR03478.1:1	Endogenous1	miRNA	-1.01	0.943278	1
hsa-miR-639	MIMAT0003309	nmiR03636.1:1	Endogenous1	miRNA	-1.01	0.943941	1
hsa-miR-128-2-5p	MIMAT0031095	nmiR04030.1:1	Endogenous1	miRNA	-1.01	0.945714	1
hsa-miR-373-3p	MIMAT0000726	nmiR03347.1:1	Endogenous1	miRNA	-1.01	0.946022	1
hsa-miR-520a-5p	MIMAT0002833	nmiR03476.1:1	Endogenous1	miRNA	-1.01	0.948325	1
hsa-miR-3168	MIMAT0015043	nmiR03876.1:1	Endogenous1	miRNA	-1.01	0.949263	1
hsa-miR-125b-5p	MIMAT0000423	nmiR03127.1:1	Endogenous1	miRNA	1.02	0.952271	1
hsa-miR-595	MIMAT0003263	nmiR03591.1:1	Endogenous1	miRNA	1.01	0.953532	1
hsa-miR-1909-3p	MIMAT0007883	nmiR03841.1:1	Endogenous1	miRNA	1.01	0.956696	1
hsa-miR-196a-3p	MIMAT0004562	nmiR03921.1:1	Endogenous1	miRNA	-1	0.957855	1
hsa-miR-502-3p	MIMAT0004775	nmiR03432.1:1	Endogenous1	miRNA	1.01	0.958446	1
hsa-let-7i-5p	MIMAT0000415	nmiR03120.1:1	Endogenous1	miRNA	1.03	0.958618	1
hsa-miR-3934-5p	MIMAT0018349	nmiR03897.1:1	Endogenous1	miRNA	1.01	0.960683	1
hsa-miR-1244	MIMAT0005896	nmiR03757.1:1	Endogenous1	miRNA	1.01	0.961474	1
hsa-miR-32-5p	MIMAT0000090	nmiR03162.1:1	Endogenous1	miRNA	1.01	0.964272	1
hsa-miR-98-3p	MIMAT0022842	nmiR03987.1:1	Endogenous1	miRNA	-1	0.964973	1
hsa-miR-454-3p	MIMAT0003885	nmiR03397.1:1	Endogenous1	miRNA	1.01	0.968499	1
hsa-miR-553	MIMAT0003216	nmiR03547.1:1	Endogenous1	miRNA	-1	0.968753	1
hsa-miR-516a-5p	MIMAT0004770	nmiR03459.1:1	Endogenous1	miRNA	-1	0.968897	1
hsa-miR-500a-5p+hsa-miR-501-5p	MIMAT0004773	nmiR03429.1:1	Endogenous1	miRNA	-1.01	0.96904	1
hsa-miR-106a-5p+hsa-miR-17-5p	MIMAT0000103	nmiR03184.1:1	Endogenous1	miRNA	1.01	0.969873	1
hsa-miR-412-3p	MIMAT0002170	nmiR03375.1:1	Endogenous1	miRNA	-1	0.973968	1
hsa-miR-377-3p	MIMAT0000730	nmiR03176.1:1	Endogenous1	miRNA	-1	0.973979	1
hsa-miR-1279	MIMAT0005937	nmiR03800.1:1	Endogenous1	miRNA	-1	0.974757	1
hsa-let-7a-5p	MIMAT0000062	nmiR03113.1:1	Endogenous1	miRNA	1.01	0.974848	1
hsa-miR-31-5p	MIMAT0000089	nmiR03161.1:1	Endogenous1	miRNA	-1.01	0.977424	1
hsa-miR-1278	MIMAT0005936	nmiR03799.1:1	Endogenous1	miRNA	1	0.978048	1
hsa-miR-376c-3p	MIMAT0000720	nmiR03354.1:1	Endogenous1	miRNA	1.01	0.979111	1
hsa-miR-450a-2-3p	MIMAT0031074	nmiR04029.1:1	Endogenous1	miRNA	1	0.979583	1
hsa-miR-365b-5p	MIMAT0022833	nmiR03985.1:1	Endogenous1	miRNA	-1	0.98014	1
hsa-miR-208a-3p	MIMAT0000241	nmiR03266.1:1	Endogenous1	miRNA	-1	0.980569	1
hsa-miR-520e	MIMAT0002825	nmiR03481.1:1	Endogenous1	miRNA	1	0.981939	1
hsa-miR-584-5p	MIMAT0003249	nmiR03580.1:1	Endogenous1	miRNA	-1	0.986608	1
hsa-miR-1973	MIMAT0009448	nmiR03849.1:1	Endogenous1	miRNA	-1	0.986822	1
hsa-miR-548b-3p	MIMAT0003254	nmiR03517.1:1	Endogenous1	miRNA	-1	0.987314	1
hsa-miR-6503-5p	MIMAT0025462	nmiR03994.1:1	Endogenous1	miRNA	1	0.987318	1
hsa-miR-503-3p	MIMAT0022925	nmiR03991.1:1	Endogenous1	miRNA	1	0.988343	1
hsa-miR-211-5p	MIMAT0000268	nmiR03270.1:1	Endogenous1	miRNA	-1	0.990306	1
hsa-miR-152-5p	MIMAT0026479	nmiR04004.1:1	Endogenous1	miRNA	1	0.994668	1
hsa-miR-1299	MIMAT0005887	nmiR03819.1:1	Endogenous1	miRNA	-1	0.994713	1
hsa-miR-296-5p	MIMAT0000690	nmiR03286.1:1	Endogenous1	miRNA	1	0.999316	1
