# Supplementary material for: Matched Analyses of Brain Metastases versus Primary Non-Small Cell Lung Cancer Reveal a Unique microRNA Signature
Source: Int J Mol Sci. 2022 Dec 22;24(1):193. doi: 10.3390/ijms24010193 (PMC9820685; doi:10.3390/ijms24010193)
Supplement: Supplementary file 1 [file ijms-24-00193-s001.zip › Table S2.xlsx]

## Sheet: Sheet1
Probe Name	Accession #	NS Probe ID	% Samples above Threshold	2A Primary	2A Metastasis	2B Primary	2B Metastasis	2C Primary	2C Metastasis	2D Primary	2D Metastasis	2E Primary	2E Metastasis	2F Primary	2F Metastasis	2G Primary	2G Metastasis	2H Primary	2H Metastasis
hsa-miR-124-3p	MIMAT0000422	nmiR03188.1:1	100	15.84	70.53	35.92	129.3	36.06	33.13	17.82	34.73	20.61	29.65	27.24	73.12	18.08	33.38	15.16	93.42
hsa-miR-129-2-3p	MIMAT0004605	nmiR03195.1:1	100	24.37	70.53	32.42	178.82	28.05	36.95	25.74	72.52	90.49	29.65	33.65	155.37	30.99	29.67	19.49	92.36
hsa-miR-142-3p	MIMAT0000434	nmiR03213.1:1	100	1820.79	454.82	6282.58	764.81	3317.42	674.03	2525.43	1378.9	4679.67	1089.56	13566.1	2140.7	6417.34	870.74	8391.8	1287.68
hsa-miR-150-5p	MIMAT0000451	nmiR03225.1:1	100	2637.34	273.62	11795.1	1608.49	4589.1	646	8106.93	1348.26	4738.8	3311.05	17024.8	3486.26	11070.9	1648.74	9571.76	2608.28
hsa-miR-199a-3p+hsa-miR-199b-3p	MIMAT0000232	nmiR03255.1:1	100	1046.89	220.11	2100.03	302.62	947.15	159.27	1515.66	262.5	3838.35	707.32	3682.96	1281.58	2250.59	771.51	2430.65	1505.31
hsa-miR-199a-5p	MIMAT0000231	nmiR03256.1:1	100	795.83	256.6	2626.58	292.54	1217.99	186.03	1983.92	203.26	2448.69	392.84	2705.54	736.25	2002.67	600.89	1474.41	1441.61
hsa-miR-199b-5p	MIMAT0000263	nmiR03257.1:1	100	461.9	167.82	1232.69	154.98	575.34	109.58	979.09	121.55	1370.84	194.83	1933.21	340.2	985.2	296.74	884.79	527.6
hsa-miR-219a-2-3p	MIMAT0004675	nmiR03279.1:1	100	17.06	59.59	37.67	241.18	31.25	39.5	26.73	108.27	10.75	27.53	27.24	31.48	24.53	29.67	13.71	25.48
hsa-miR-219a-5p	MIMAT0000276	nmiR03280.1:1	100	24.37	77.83	49.94	469.52	43.27	95.56	40.59	200.2	17.92	37.06	37.65	33.51	23.24	30.6	34.64	36.09
hsa-miR-9-5p	MIMAT0000441	nmiR03124.1:1	100	30.47	139.85	24.53	365.9	23.24	57.34	39.6	228.8	88.7	77.3	47.27	127.95	50.36	369.99	218.67	296.18
Probe Name	Accession #	NS Probe ID	% Samples above Threshold	2A Fold Metastasis / Primary	2B Fold Metastasis / Primary	2C Fold Metastasis / Primary	2D Fold Metastasis / Primary	2E Fold Metastasis / Primary	2F Fold Metastasis / Primary	2G Fold Metastasis / Primary	2H Fold Metastasis / Primary	Paired two-tailed t test normalized counts
hsa-miR-124-3p	MIMAT0000422	nmiR03188.1:1	100	4.45265	3.59967	0.918747	1.94893	1.43862	2.68429	1.84624	6.16227	0.0161
hsa-miR-129-2-3p	MIMAT0004605	nmiR03195.1:1	100	2.89413	5.51573	1.31729	2.8174	0.327661	4.61724	0.957406	4.73884	0.085
hsa-miR-142-3p	MIMAT0000434	nmiR03213.1:1	100	0.249793	0.121735	0.203179	0.546006	0.232828	0.157797	0.135686	0.153445	0.0054
hsa-miR-150-5p	MIMAT0000451	nmiR03225.1:1	100	0.103748	0.13637	0.140768	0.16631	0.698711	0.204776	0.148926	0.272497	0.0023
hsa-miR-199a-3p+hsa-miR-199b-3p	MIMAT0000232	nmiR03255.1:1	100	0.210251	0.144103	0.168157	0.173192	0.184277	0.347976	0.342803	0.619303	0.0011
hsa-miR-199a-5p	MIMAT0000231	nmiR03256.1:1	100	0.322431	0.111377	0.152735	0.102454	0.160429	0.272127	0.300044	0.977754	0.0017
hsa-miR-199b-5p	MIMAT0000263	nmiR03257.1:1	100	0.363325	0.125725	0.190461	0.124146	0.142125	0.175977	0.301198	0.5963	0.0014
hsa-miR-219a-2-3p	MIMAT0004675	nmiR03279.1:1	100	3.49297	6.40244	1.264	4.05051	2.56093	1.15565	1.20954	1.8585	0.0955
hsa-miR-219a-5p	MIMAT0000276	nmiR03280.1:1	100	3.19368	9.40168	2.20846	4.93225	2.06808	0.89004	1.3167	1.04186	0.125
hsa-miR-9-5p	MIMAT0000441	nmiR03124.1:1	100	4.58976	14.9164	2.4673	5.77778	0.871477	2.70679	7.3469	1.35446	0.0171
