# Supplementary material for: Matched Analyses of Brain Metastases versus Primary Non-Small Cell Lung Cancer Reveal a Unique microRNA Signature
Source: Int J Mol Sci. 2022 Dec 22;24(1):193. doi: 10.3390/ijms24010193 (PMC9820685; doi:10.3390/ijms24010193)
Supplement: Supplementary file 1 [file ijms-24-00193-s001.zip › Table S3.xlsx]

## Sheet: TargetScan7
Target gene	Representative transcript	Gene name	Representative miRNA	miRNA expression in metastasis	Cumulative weighted context++ score
ONECUT2	ENST00000491143.2	one cut homeobox 2	hsa-miR-9-5p	Upregulated	-5.06
ZNF776	ENST00000317178.5	zinc finger protein 776	hsa-miR-199a-5p	Downregulated	-4.68
ZNF439	ENST00000304030.2	zinc finger protein 439	hsa-miR-199a-5p	Downregulated	-3.53
ZNF544	ENST00000599227.1	zinc finger protein 544	hsa-miR-199a-5p	Downregulated	-3.45
ZNF791	ENST00000446165.1	zinc finger protein 791	hsa-miR-199b-5p	Downregulated	-3.04
ZNF788	ENST00000430298.2	zinc finger family member 788	hsa-miR-199b-5p	Downregulated	-2.79
SEC14L1	ENST00000413679.2	SEC14-like 1 (S. cerevisiae)	hsa-miR-129-1-3p	Upregulated	-2.54
ZNF627	ENST00000588174.1	zinc finger protein 627	hsa-miR-199b-5p	Downregulated	-2.51
ZIK1	ENST00000307468.4	zinc finger protein interacting with K protein 1	hsa-miR-199a-5p	Downregulated	-2.44
ZNF772	ENST00000425074.3	zinc finger protein 772	hsa-miR-199b-5p	Downregulated	-1.99
ZNF709	ENST00000397732.3	zinc finger protein 709	hsa-miR-199a-5p	Downregulated	-1.57
ZNF584	ENST00000599238.1	zinc finger protein 584	hsa-miR-199b-5p	Downregulated	-1.56
ZNF625	ENST00000455799.1	zinc finger protein 625	hsa-miR-199b-5p	Downregulated	-1.55
ZNF256	ENST00000598928.1	zinc finger protein 256	hsa-miR-199a-5p	Downregulated	-1.44
RHOG	ENST00000351018.4	ras homolog family member G	hsa-miR-124-3p.1	Upregulated	-1.44
ZNF547	ENST00000282282.3	zinc finger protein 547	hsa-miR-199a-5p	Downregulated	-1.41
CTDSP1	ENST00000273062.2	CTD (carboxy-terminal domain, RNA polymerase II, polypeptide A) small phosphatase 1	hsa-miR-124-3p.1	Upregulated	-1.37
SNAI2	ENST00000020945.1	snail family zinc finger 2	hsa-miR-124-3p.1	Upregulated	-1.28
YBX3	ENST00000279550.7	Y box binding protein 3	hsa-miR-9-5p	Upregulated	-1.23
BOD1	ENST00000311086.4	biorientation of chromosomes in cell division 1	hsa-miR-142-3p.1	Downregulated	-1.18
LRRC58	ENST00000295628.3	leucine rich repeat containing 58	hsa-miR-124-3p.1	Upregulated	-1.16
LYVE1	ENST00000256178.3	lymphatic vessel endothelial hyaluronan receptor 1	hsa-miR-9-5p	Upregulated	-1.15
MYB	ENST00000367814.4	v-myb avian myeloblastosis viral oncogene homolog	hsa-miR-150-5p	Downregulated	-1.14
B4GALT1	ENST00000379731.4	UDP-Gal:betaGlcNAc beta 1,4- galactosyltransferase, polypeptide 1	hsa-miR-124-3p.1	Upregulated	-1.14
WASL	ENST00000223023.4	Wiskott-Aldrich syndrome-like	hsa-miR-142-3p.1	Downregulated	-1.13
POU2F1	ENST00000367866.2	POU class 2 homeobox 1	hsa-miR-9-5p	Upregulated	-1.11
ONECUT1	ENST00000560699.2	one cut homeobox 1	hsa-miR-9-5p	Upregulated	-1.09
MDM4	ENST00000391947.2	Mdm4 p53 binding protein homolog (mouse)	hsa-miR-150-5p	Downregulated	-1.04
MAP3K11	ENST00000309100.3	mitogen-activated protein kinase kinase kinase 11	hsa-miR-199a-5p	Downregulated	-1.03
LIN7C	ENST00000278193.2	lin-7 homolog C (C. elegans)	hsa-miR-199a-5p	Downregulated	-1.02
SLC10A7	ENST00000264986.3	solute carrier family 10, member 7	hsa-miR-124-3p.1	Upregulated	-1.01
RHOBTB3	ENST00000379982.3	Rho-related BTB domain containing 3	hsa-miR-142-3p.1	Downregulated	-1
ARNTL	ENST00000389708.3	aryl hydrocarbon receptor nuclear translocator-like	hsa-miR-142-3p.1	Downregulated	-0.98
VAMP3	ENST00000054666.6	vesicle-associated membrane protein 3	hsa-miR-124-3p.1	Upregulated	-0.98
TMEM136	ENST00000529187.1	transmembrane protein 136	hsa-miR-129-1-3p	Upregulated	-0.96
SLC50A1	ENST00000368404.4	solute carrier family 50 (sugar efflux transporter), member 1	hsa-miR-9-5p	Upregulated	-0.95
PVRL2	ENST00000252485.4	poliovirus receptor-related 2 (herpesvirus entry mediator B)	hsa-miR-199a-5p	Downregulated	-0.93
ZBTB18	ENST00000358704.4	zinc finger and BTB domain containing 18	hsa-miR-219a-5p	Upregulated	-0.93
ZNF561	ENST00000326044.5	zinc finger protein 561	hsa-miR-199a-5p	Downregulated	-0.92
MAGT1	ENST00000358075.6	magnesium transporter 1	hsa-miR-124-3p.1	Upregulated	-0.92
DDR1	ENST00000446312.1	discoidin domain receptor tyrosine kinase 1	hsa-miR-199a-5p	Downregulated	-0.91
RORB	ENST00000376896.3	RAR-related orphan receptor B	hsa-miR-219a-5p	Upregulated	-0.91
SERINC2	ENST00000373709.3	serine incorporator 2	hsa-miR-124-3p.1	Upregulated	-0.9
SERP1	ENST00000239944.2	stress-associated endoplasmic reticulum protein 1	hsa-miR-124-3p.1	Upregulated	-0.88
ENSA	ENST00000369014.5	endosulfine alpha	hsa-miR-150-5p	Downregulated	-0.87
TRIM45	ENST00000256649.4	tripartite motif containing 45	hsa-miR-124-3p.1	Upregulated	-0.86
RP11-1396O13.13	ENST00000508324.1	Uncharacterized protein	hsa-miR-199b-5p	Downregulated	-0.85
ZNF23	ENST00000497160.1	zinc finger protein 23	hsa-miR-199a-5p	Downregulated	-0.85
BCAM	ENST00000270233.6	basal cell adhesion molecule (Lutheran blood group)	hsa-miR-199a-5p	Downregulated	-0.84
SHOC2	ENST00000369452.4	soc-2 suppressor of clear homolog (C. elegans)	hsa-miR-199a-5p	Downregulated	-0.82
GXYLT1	ENST00000398675.3	glucoside xylosyltransferase 1	hsa-miR-219a-5p	Upregulated	-0.82
HAPLN1	ENST00000274341.4	hyaluronan and proteoglycan link protein 1	hsa-miR-199b-5p	Downregulated	-0.81
ZFP2	ENST00000361362.2	ZFP2 zinc finger protein	hsa-miR-199a-5p	Downregulated	-0.81
FAM114A1	ENST00000358869.2	family with sequence similarity 114, member A1	hsa-miR-142-3p.1	Downregulated	-0.81
PDCD6	ENST00000505221.1	programmed cell death 6	hsa-miR-124-3p.1	Upregulated	-0.81
ITGB1	ENST00000396033.2	integrin, beta 1 (fibronectin receptor, beta polypeptide, antigen CD29 includes MDF2, MSK12)	hsa-miR-124-3p.1	Upregulated	-0.81
CEBPA	ENST00000498907.2	CCAAT/enhancer binding protein (C/EBP), alpha	hsa-miR-124-3p.1	Upregulated	-0.81
TST	ENST00000403892.3	thiosulfate sulfurtransferase (rhodanese)	hsa-miR-199a-5p	Downregulated	-0.8
KLHL3	ENST00000541417.1	kelch-like family member 3	hsa-miR-199a-3p	Downregulated	-0.8
DNAJC1	ENST00000376980.3	DnaJ (Hsp40) homolog, subfamily C, member 1	hsa-miR-124-3p.1	Upregulated	-0.8
SPOPL	ENST00000280098.4	speckle-type POZ protein-like	hsa-miR-124-3p.1	Upregulated	-0.8
MANBAL	ENST00000397150.1	mannosidase, beta A, lysosomal-like	hsa-miR-142-3p.1	Downregulated	-0.79
RAB27A	ENST00000396307.2	RAB27A, member RAS oncogene family	hsa-miR-124-3p.1	Upregulated	-0.79
CCP110	ENST00000381396.5	centriolar coiled coil protein 110kDa	hsa-miR-129-1-3p	Upregulated	-0.79
POU6F2	ENST00000518318.2	POU class 6 homeobox 2	hsa-miR-9-5p	Upregulated	-0.78
SERPINE2	ENST00000409304.1	serpin peptidase inhibitor, clade E (nexin, plasminogen activator inhibitor type 1), member 2	hsa-miR-199a-3p	Downregulated	-0.77
TRPM7	ENST00000560955.1	transient receptor potential cation channel, subfamily M, member 7	hsa-miR-9-5p	Upregulated	-0.77
MYRF	ENST00000278836.5	myelin regulatory factor	hsa-miR-199a-5p	Downregulated	-0.76
CELSR1	ENST00000262738.3	cadherin, EGF LAG seven-pass G-type receptor 1	hsa-miR-199a-5p	Downregulated	-0.76
CHIC1	ENST00000373504.6	cysteine-rich hydrophobic domain 1	hsa-miR-124-3p.1	Upregulated	-0.76
GPR63	ENST00000229955.3	G protein-coupled receptor 63	hsa-miR-199a-5p	Downregulated	-0.75
CDCA7L	ENST00000356195.5	cell division cycle associated 7-like	hsa-miR-199a-5p	Downregulated	-0.75
TMSB4X	ENST00000451311.2	thymosin beta 4, X-linked	hsa-miR-199a-3p	Downregulated	-0.75
SLC35F5	ENST00000245680.2	solute carrier family 35, member F5	hsa-miR-142-3p.1	Downregulated	-0.75
PTBP1	ENST00000350092.4	polypyrimidine tract binding protein 1	hsa-miR-124-3p.1	Upregulated	-0.75
NSG1	ENST00000421177.2	Neuron-specific protein family member 1	hsa-miR-199b-5p	Downregulated	-0.74
RAD23B	ENST00000358015.3	RAD23 homolog B (S. cerevisiae)	hsa-miR-199a-5p	Downregulated	-0.74
PAWR	ENST00000328827.4	PRKC, apoptosis, WT1, regulator	hsa-miR-199a-3p	Downregulated	-0.74
DIRC2	ENST00000261038.5	disrupted in renal carcinoma 2	hsa-miR-142-3p.1	Downregulated	-0.74
SLITRK6	ENST00000400286.2	SLIT and NTRK-like family, member 6	hsa-miR-124-3p.1	Upregulated	-0.74
PTPN12	ENST00000248594.6	protein tyrosine phosphatase, non-receptor type 12	hsa-miR-124-3p.1	Upregulated	-0.74
PHF19	ENST00000373896.3	PHD finger protein 19	hsa-miR-124-3p.1	Upregulated	-0.74
ZBTB42	ENST00000342537.7	zinc finger and BTB domain containing 42	hsa-miR-199a-5p	Downregulated	-0.73
CRYBG3	ENST00000389622.2	beta-gamma crystallin domain containing 3	hsa-miR-199b-5p	Downregulated	-0.73
NLK	ENST00000407008.3	nemo-like kinase	hsa-miR-199a-3p	Downregulated	-0.73
QKI	ENST00000392127.2	QKI, KH domain containing, RNA binding	hsa-miR-199a-3p	Downregulated	-0.73
TMEM200B	ENST00000521452.1	transmembrane protein 200B	hsa-miR-142-3p.1	Downregulated	-0.73
SCN3B	ENST00000392770.2	sodium channel, voltage-gated, type III, beta subunit	hsa-miR-129-1-3p	Upregulated	-0.73
VAMP3	ENST00000054666.6	vesicle-associated membrane protein 3	hsa-miR-199a-3p	Downregulated	-0.72
ADIPOR2	ENST00000357103.4	adiponectin receptor 2	hsa-miR-150-5p	Downregulated	-0.72
CLTA	ENST00000433436.2	clathrin, light chain A	hsa-miR-142-3p.1	Downregulated	-0.72
SLC37A3	ENST00000447932.2	solute carrier family 37, member 3	hsa-miR-142-3p.1	Downregulated	-0.72
HMGA2	ENST00000403681.2	high mobility group AT-hook 2	hsa-miR-142-3p.1	Downregulated	-0.72
RICTOR	ENST00000357387.3	RPTOR independent companion of MTOR, complex 2	hsa-miR-142-3p.1	Downregulated	-0.72
RNPEPL1	ENST00000270357.4	arginyl aminopeptidase (aminopeptidase B)-like 1	hsa-miR-124-3p.1	Upregulated	-0.72
S100Z	ENST00000317593.4	S100 calcium binding protein Z	hsa-miR-129-1-3p	Upregulated	-0.72
RBM47	ENST00000319592.4	RNA binding motif protein 47	hsa-miR-199a-5p	Downregulated	-0.71
GNA12	ENST00000275364.3	guanine nucleotide binding protein (G protein) alpha 12	hsa-miR-199a-3p	Downregulated	-0.71
PAK4	ENST00000599386.1	p21 protein (Cdc42/Rac)-activated kinase 4	hsa-miR-199a-3p	Downregulated	-0.71
C20orf194	ENST00000453730.2	chromosome 20 open reading frame 194	hsa-miR-142-3p.1	Downregulated	-0.71
BAG3	ENST00000369085.3	BCL2-associated athanogene 3	hsa-miR-129-1-3p	Upregulated	-0.71
AP1S2	ENST00000329235.2	adaptor-related protein complex 1, sigma 2 subunit	hsa-miR-9-5p	Upregulated	-0.71
PDPN	ENST00000294489.6	podoplanin	hsa-miR-199a-5p	Downregulated	-0.7
DEPDC1B	ENST00000265036.5	DEP domain containing 1B	hsa-miR-199a-3p	Downregulated	-0.7
BCAR3	ENST00000370247.3	breast cancer anti-estrogen resistance 3	hsa-miR-199a-3p	Downregulated	-0.7
PPFIBP2	ENST00000533792.1	PTPRF interacting protein, binding protein 2 (liprin beta 2)	hsa-miR-124-3p.1	Upregulated	-0.7
LPP	ENST00000312675.4	LIM domain containing preferred translocation partner in lipoma	hsa-miR-124-3p.1	Upregulated	-0.7
RFX4	ENST00000229387.5	regulatory factor X, 4 (influences HLA class II expression)	hsa-miR-124-3p.1	Upregulated	-0.7
OAF	ENST00000328965.4	OAF homolog (Drosophila)	hsa-miR-124-3p.1	Upregulated	-0.7
CD164	ENST00000368961.5	CD164 molecule, sialomucin	hsa-miR-219a-5p	Upregulated	-0.7
HMCN1	ENST00000367492.2	hemicentin 1	hsa-miR-199a-5p	Downregulated	-0.69
NOVA1	ENST00000465357.2	neuro-oncological ventral antigen 1	hsa-miR-199a-3p	Downregulated	-0.69
PTBP2	ENST00000609116.1	polypyrimidine tract binding protein 2	hsa-miR-124-3p.1	Upregulated	-0.69
FLOT2	ENST00000394906.2	flotillin 2	hsa-miR-124-3p.1	Upregulated	-0.69
KIAA0247	ENST00000342745.4	KIAA0247	hsa-miR-124-3p.1	Upregulated	-0.69
LHFPL2	ENST00000515007.2	lipoma HMGIC fusion partner-like 2	hsa-miR-129-1-3p	Upregulated	-0.69
SERP1	ENST00000239944.2	stress-associated endoplasmic reticulum protein 1	hsa-miR-219a-2-3p	Upregulated	-0.69
MGAT4B	ENST00000337755.5	mannosyl (alpha-1,3-)-glycoprotein beta-1,4-N-acetylglucosaminyltransferase, isozyme B	hsa-miR-199a-5p	Downregulated	-0.68
MAB21L1	ENST00000379919.4	mab-21-like 1 (C. elegans)	hsa-miR-199a-5p	Downregulated	-0.68
CDK7	ENST00000256443.3	cyclin-dependent kinase 7	hsa-miR-199a-3p	Downregulated	-0.68
AL626787.1	ENST00000595430.1		hsa-miR-124-3p.1	Upregulated	-0.68
FP15737	ENST00000399967.3		hsa-miR-199b-5p	Downregulated	-0.67
LCOR	ENST00000371103.3	ligand dependent nuclear receptor corepressor	hsa-miR-199a-5p	Downregulated	-0.67
RP11-122A3.2	ENST00000517562.2	uncharacterized protein LOC100127983	hsa-miR-199a-5p	Downregulated	-0.67
PON2	ENST00000536183.1	paraoxonase 2	hsa-miR-199a-3p	Downregulated	-0.67
TWF1	ENST00000552521.1	twinfilin actin-binding protein 1	hsa-miR-142-3p.1	Downregulated	-0.67
TSEN34	ENST00000302937.4	TSEN34 tRNA splicing endonuclease subunit	hsa-miR-142-3p.1	Downregulated	-0.67
TAOK1	ENST00000261716.3	TAO kinase 1	hsa-miR-142-3p.1	Downregulated	-0.67
CFL2	ENST00000341223.3	cofilin 2 (muscle)	hsa-miR-142-3p.1	Downregulated	-0.67
TUB	ENST00000305253.4	tubby bipartite transcription factor	hsa-miR-124-3p.1	Upregulated	-0.67
DYRK3	ENST00000367108.3	dual-specificity tyrosine-(Y)-phosphorylation regulated kinase 3	hsa-miR-129-1-3p	Upregulated	-0.67
MEMO1	ENST00000295065.5	mediator of cell motility 1	hsa-miR-129-1-3p	Upregulated	-0.67
ARHGAP21	ENST00000396432.2	Rho GTPase activating protein 21	hsa-miR-199b-5p	Downregulated	-0.66
ZNF225	ENST00000592780.1	zinc finger protein 225	hsa-miR-199a-5p	Downregulated	-0.66
FAM199X	ENST00000493442.1	family with sequence similarity 199, X-linked	hsa-miR-199a-3p	Downregulated	-0.66
CYB5R4	ENST00000369681.5	cytochrome b5 reductase 4	hsa-miR-199a-3p	Downregulated	-0.66
HILPDA	ENST00000257696.4	hypoxia inducible lipid droplet-associated	hsa-miR-150-5p	Downregulated	-0.66
FBXO3	ENST00000526785.1	F-box protein 3	hsa-miR-142-3p.1	Downregulated	-0.66
SERAC1	ENST00000367102.2	serine active site containing 1	hsa-miR-142-3p.1	Downregulated	-0.66
LCOR	ENST00000371103.3	ligand dependent nuclear receptor corepressor	hsa-miR-142-3p.1	Downregulated	-0.66
TMEM134	ENST00000393877.3	transmembrane protein 134	hsa-miR-124-3p.1	Upregulated	-0.66
RAB34	ENST00000447716.1	RAB34, member RAS oncogene family	hsa-miR-124-3p.1	Upregulated	-0.66
CPT1A	ENST00000265641.5	carnitine palmitoyltransferase 1A (liver)	hsa-miR-124-3p.1	Upregulated	-0.66
PDK4	ENST00000005178.5	pyruvate dehydrogenase kinase, isozyme 4	hsa-miR-9-5p	Upregulated	-0.66
TSPAN6	ENST00000373020.4	tetraspanin 6	hsa-miR-199a-5p	Downregulated	-0.65
CD2AP	ENST00000359314.5	CD2-associated protein	hsa-miR-199a-3p	Downregulated	-0.65
CNEP1R1	ENST00000562576.1	CTD nuclear envelope phosphatase 1 regulatory subunit 1	hsa-miR-124-3p.1	Upregulated	-0.65
TBX22	ENST00000442340.1	T-box 22	hsa-miR-124-3p.1	Upregulated	-0.65
FAM83F	ENST00000333407.6	family with sequence similarity 83, member F	hsa-miR-129-1-3p	Upregulated	-0.65
LDLRAP1	ENST00000374338.4	low density lipoprotein receptor adaptor protein 1	hsa-miR-9-5p	Upregulated	-0.65
CTNNA1	ENST00000518825.1	catenin (cadherin-associated protein), alpha 1, 102kDa	hsa-miR-9-5p	Upregulated	-0.65
RASSF3	ENST00000542104.1	Ras association (RalGDS/AF-6) domain family member 3	hsa-miR-219a-5p	Upregulated	-0.65
SIX4	ENST00000216513.4	SIX homeobox 4	hsa-miR-124-3p.1	Upregulated	-0.64
C11orf87	ENST00000327419.6	chromosome 11 open reading frame 87	hsa-miR-124-3p.1	Upregulated	-0.64
C2ORF15	ENST00000302513.2	Uncharacterized protein C2orf15	hsa-miR-9-5p	Upregulated	-0.64
IMPG1	ENST00000369963.3	interphotoreceptor matrix proteoglycan 1	hsa-miR-219a-2-3p	Upregulated	-0.64
ECE1	ENST00000415912.2	endothelin converting enzyme 1	hsa-miR-199a-5p	Downregulated	-0.63
SULF1	ENST00000458141.2	sulfatase 1	hsa-miR-199a-5p	Downregulated	-0.63
GCNT2	ENST00000316170.3	glucosaminyl (N-acetyl) transferase 2, I-branching enzyme (I blood group)	hsa-miR-199a-5p	Downregulated	-0.63
CISD2	ENST00000273986.4	CDGSH iron sulfur domain 2	hsa-miR-199a-3p	Downregulated	-0.63
FAM208B	ENST00000328090.5	family with sequence similarity 208, member B	hsa-miR-142-3p.1	Downregulated	-0.63
CNIH4	ENST00000465271.1	cornichon family AMPA receptor auxiliary protein 4	hsa-miR-142-3p.1	Downregulated	-0.63
SLC50A1	ENST00000368404.4	solute carrier family 50 (sugar efflux transporter), member 1	hsa-miR-124-3p.1	Upregulated	-0.63
VPS37C	ENST00000301765.5	vacuolar protein sorting 37 homolog C (S. cerevisiae)	hsa-miR-124-3p.1	Upregulated	-0.63
NFATC1	ENST00000253506.5	nuclear factor of activated T-cells, cytoplasmic, calcineurin-dependent 1	hsa-miR-124-3p.1	Upregulated	-0.63
RNFT1	ENST00000442346.2	ring finger protein, transmembrane 1	hsa-miR-124-3p.1	Upregulated	-0.63
RBM24	ENST00000379052.5	RNA binding motif protein 24	hsa-miR-219a-5p	Upregulated	-0.63
AKAP1	ENST00000337714.3	A kinase (PRKA) anchor protein 1	hsa-miR-199a-5p	Downregulated	-0.62
FAM222B	ENST00000582266.1	family with sequence similarity 222, member B	hsa-miR-199a-5p	Downregulated	-0.62
MCFD2	ENST00000444761.2	multiple coagulation factor deficiency 2	hsa-miR-199a-3p	Downregulated	-0.62
UPRT	ENST00000373379.1	uracil phosphoribosyltransferase (FUR1) homolog (S. cerevisiae)	hsa-miR-199a-3p	Downregulated	-0.62
DIRC2	ENST00000261038.5	disrupted in renal carcinoma 2	hsa-miR-199a-3p	Downregulated	-0.62
PTPN23	ENST00000265562.4	protein tyrosine phosphatase, non-receptor type 23	hsa-miR-142-3p.1	Downregulated	-0.62
KCNJ2	ENST00000243457.3	potassium inwardly-rectifying channel, subfamily J, member 2	hsa-miR-9-5p	Upregulated	-0.62
CTD-2330K9.3	ENST00000419183.1	Uncharacterized protein	hsa-miR-219a-5p	Upregulated	-0.62
ALS2	ENST00000457679.2	amyotrophic lateral sclerosis 2 (juvenile)	hsa-miR-199b-5p	Downregulated	-0.61
GPR89B	ENST00000314163.7	G protein-coupled receptor 89B	hsa-miR-199a-5p	Downregulated	-0.61
CD151	ENST00000322008.4	CD151 molecule (Raph blood group)	hsa-miR-199a-3p	Downregulated	-0.61
NR2F6	ENST00000291442.3	nuclear receptor subfamily 2, group F, member 6	hsa-miR-142-3p.1	Downregulated	-0.61
RAC1	ENST00000348035.4	ras-related C3 botulinum toxin substrate 1 (rho family, small GTP binding protein Rac1)	hsa-miR-142-3p.1	Downregulated	-0.61
ASPA	ENST00000263080.2	aspartoacylase	hsa-miR-124-3p.1	Upregulated	-0.61
GXYLT1	ENST00000398675.3	glucoside xylosyltransferase 1	hsa-miR-124-3p.1	Upregulated	-0.61
BMP6	ENST00000283147.6	bone morphogenetic protein 6	hsa-miR-124-3p.1	Upregulated	-0.61
SGMS2	ENST00000394684.4	sphingomyelin synthase 2	hsa-miR-9-5p	Upregulated	-0.61
MAGT1	ENST00000358075.6	magnesium transporter 1	hsa-miR-199b-5p	Downregulated	-0.6
SLC24A3	ENST00000328041.6	solute carrier family 24 (sodium/potassium/calcium exchanger), member 3	hsa-miR-199a-5p	Downregulated	-0.6
MTHFD2	ENST00000394053.2	methylenetetrahydrofolate dehydrogenase (NADP+ dependent) 2, methenyltetrahydrofolate cyclohydrolase	hsa-miR-9-5p	Upregulated	-0.6
C13orf45	ENST00000318245.4	chromosome 13 open reading frame 45	hsa-miR-219a-2-3p	Upregulated	-0.6
EYA1	ENST00000388742.4	eyes absent homolog 1 (Drosophila)	hsa-miR-219a-5p	Upregulated	-0.6
T	ENST00000296946.2	T, brachyury homolog (mouse)	hsa-miR-219a-5p	Upregulated	-0.6
ZNF846	ENST00000586293.1	zinc finger protein 846	hsa-miR-199a-5p	Downregulated	-0.59
B3GNT1	ENST00000311181.4	UDP-GlcNAc:betaGal beta-1,3-N-acetylglucosaminyltransferase 1	hsa-miR-199a-5p	Downregulated	-0.59
MAP3K4	ENST00000366919.2	mitogen-activated protein kinase kinase kinase 4	hsa-miR-199a-3p	Downregulated	-0.59
PIGB	ENST00000164305.5	phosphatidylinositol glycan anchor biosynthesis, class B	hsa-miR-199a-3p	Downregulated	-0.59
CELSR2	ENST00000271332.3	cadherin, EGF LAG seven-pass G-type receptor 2	hsa-miR-199a-3p	Downregulated	-0.59
CFL2	ENST00000341223.3	cofilin 2 (muscle)	hsa-miR-199a-3p	Downregulated	-0.59
CLIC4	ENST00000374379.4	chloride intracellular channel 4	hsa-miR-142-3p.1	Downregulated	-0.59
SEC22A	ENST00000481965.2	SEC22 vesicle trafficking protein homolog A (S. cerevisiae)	hsa-miR-142-3p.1	Downregulated	-0.59
RAB3A	ENST00000222256.4	RAB3A, member RAS oncogene family	hsa-miR-142-3p.1	Downregulated	-0.59
SLC31A2	ENST00000259392.3	solute carrier family 31 (copper transporter), member 2	hsa-miR-124-3p.1	Upregulated	-0.59
CD164	ENST00000368961.5	CD164 molecule, sialomucin	hsa-miR-124-3p.1	Upregulated	-0.59
TARBP1	ENST00000040877.1	TAR (HIV-1) RNA binding protein 1	hsa-miR-124-3p.1	Upregulated	-0.59
PIK3C2A	ENST00000265970.7	phosphatidylinositol-4-phosphate 3-kinase, catalytic subunit type 2 alpha	hsa-miR-124-3p.1	Upregulated	-0.59
PPP1R13L	ENST00000360957.5	protein phosphatase 1, regulatory subunit 13 like	hsa-miR-124-3p.1	Upregulated	-0.59
MAP3K2	ENST00000409947.1	mitogen-activated protein kinase kinase kinase 2	hsa-miR-124-3p.1	Upregulated	-0.59
DHRS1	ENST00000288111.7	dehydrogenase/reductase (SDR family) member 1	hsa-miR-124-3p.1	Upregulated	-0.59
DOLPP1	ENST00000540102.1	dolichyldiphosphatase 1	hsa-miR-129-1-3p	Upregulated	-0.59
TMEM100	ENST00000424486.2	transmembrane protein 100	hsa-miR-129-1-3p	Upregulated	-0.59
FRMD6	ENST00000395718.2	FERM domain containing 6	hsa-miR-9-5p	Upregulated	-0.59
FSTL1	ENST00000295633.3	follistatin-like 1	hsa-miR-9-5p	Upregulated	-0.59
FOXJ3	ENST00000372571.1	forkhead box J3	hsa-miR-219a-5p	Upregulated	-0.59
CC2D1A	ENST00000318003.7	coiled-coil and C2 domain containing 1A	hsa-miR-219a-5p	Upregulated	-0.59
TGFB2	ENST00000366930.4	transforming growth factor, beta 2	hsa-miR-199b-5p	Downregulated	-0.58
ZNF329	ENST00000598312.1	zinc finger protein 329	hsa-miR-199a-5p	Downregulated	-0.58
EPB41L1	ENST00000441639.1	erythrocyte membrane protein band 4.1-like 1	hsa-miR-199a-5p	Downregulated	-0.58
ZNF233	ENST00000592581.1	zinc finger protein 233	hsa-miR-199a-5p	Downregulated	-0.58
SCD	ENST00000370355.2	stearoyl-CoA desaturase (delta-9-desaturase)	hsa-miR-199a-3p	Downregulated	-0.58
FGF7	ENST00000267843.4	fibroblast growth factor 7	hsa-miR-199a-3p	Downregulated	-0.58
TADA1	ENST00000367874.4	transcriptional adaptor 1	hsa-miR-150-5p	Downregulated	-0.58
IER3	ENST00000376377.2	immediate early response 3	hsa-miR-142-3p.1	Downregulated	-0.58
GAB1	ENST00000262995.4	GRB2-associated binding protein 1	hsa-miR-142-3p.1	Downregulated	-0.58
TTL	ENST00000233336.6	tubulin tyrosine ligase	hsa-miR-124-3p.1	Upregulated	-0.58
MITF	ENST00000328528.6	microphthalmia-associated transcription factor	hsa-miR-124-3p.1	Upregulated	-0.58
PI4K2B	ENST00000264864.6	phosphatidylinositol 4-kinase type 2 beta	hsa-miR-124-3p.1	Upregulated	-0.58
PTPN9	ENST00000306726.2	protein tyrosine phosphatase, non-receptor type 9	hsa-miR-124-3p.1	Upregulated	-0.58
LRRC1	ENST00000370888.1	leucine rich repeat containing 1	hsa-miR-124-3p.1	Upregulated	-0.58
SLC16A1	ENST00000369626.3	solute carrier family 16 (monocarboxylate transporter), member 1	hsa-miR-124-3p.1	Upregulated	-0.58
FZD4	ENST00000531380.1	frizzled family receptor 4	hsa-miR-124-3p.1	Upregulated	-0.58
IQGAP1	ENST00000268182.5	IQ motif containing GTPase activating protein 1	hsa-miR-124-3p.1	Upregulated	-0.58
CBX2	ENST00000310942.4	chromobox homolog 2	hsa-miR-124-3p.1	Upregulated	-0.58
RIC3	ENST00000396677.2	RIC3 acetylcholine receptor chaperone	hsa-miR-9-5p	Upregulated	-0.58
LIN28B	ENST00000345080.4	lin-28 homolog B (C. elegans)	hsa-miR-9-5p	Upregulated	-0.58
PRDM6	ENST00000407847.4	PR domain containing 6	hsa-miR-9-5p	Upregulated	-0.58
RAB34	ENST00000447716.1	RAB34, member RAS oncogene family	hsa-miR-9-5p	Upregulated	-0.58
TMEM98	ENST00000579849.1	transmembrane protein 98	hsa-miR-219a-5p	Upregulated	-0.58
SNRK	ENST00000429705.2	SNF related kinase	hsa-miR-219a-5p	Upregulated	-0.58
VPS26A	ENST00000395098.1	vacuolar protein sorting 26 homolog A (S. pombe)	hsa-miR-199a-5p	Downregulated	-0.57
FLRT3	ENST00000378053.3	fibronectin leucine rich transmembrane protein 3	hsa-miR-199a-5p	Downregulated	-0.57
CCDC43	ENST00000457422.2	coiled-coil domain containing 43	hsa-miR-199a-5p	Downregulated	-0.57
GJA5	ENST00000271348.2	gap junction protein, alpha 5, 40kDa	hsa-miR-199a-5p	Downregulated	-0.57
PODXL	ENST00000541194.1	podocalyxin-like	hsa-miR-199a-5p	Downregulated	-0.57
C9orf40	ENST00000376854.5	chromosome 9 open reading frame 40	hsa-miR-199a-3p	Downregulated	-0.57
LPAR4	ENST00000435339.3	lysophosphatidic acid receptor 4	hsa-miR-199a-3p	Downregulated	-0.57
CXCL11	ENST00000306621.3	chemokine (C-X-C motif) ligand 11	hsa-miR-199a-3p	Downregulated	-0.57
SLC26A2	ENST00000286298.4	solute carrier family 26 (anion exchanger), member 2	hsa-miR-124-3p.1	Upregulated	-0.57
FOXQ1	ENST00000296839.2	forkhead box Q1	hsa-miR-124-3p.1	Upregulated	-0.57
KIAA1671	ENST00000401395.1	KIAA1671	hsa-miR-124-3p.1	Upregulated	-0.57
VAT1	ENST00000355653.3	vesicle amine transport 1	hsa-miR-124-3p.1	Upregulated	-0.57
ELOVL2	ENST00000354666.3	ELOVL fatty acid elongase 2	hsa-miR-129-1-3p	Upregulated	-0.57
PXMP4	ENST00000344022.3	peroxisomal membrane protein 4, 24kDa	hsa-miR-129-2-3p	Upregulated	-0.57
STARD4	ENST00000512160.1	StAR-related lipid transfer (START) domain containing 4	hsa-miR-129-1-3p	Upregulated	-0.57
SLC31A2	ENST00000259392.3	solute carrier family 31 (copper transporter), member 2	hsa-miR-9-5p	Upregulated	-0.57
ANK2	ENST00000357077.4	ankyrin 2, neuronal	hsa-miR-9-5p	Upregulated	-0.57
FZD6	ENST00000358755.4	frizzled family receptor 6	hsa-miR-199a-5p	Downregulated	-0.56
ANGEL2	ENST00000535388.1	angel homolog 2 (Drosophila)	hsa-miR-199a-5p	Downregulated	-0.56
KIAA0319L	ENST00000325722.3	KIAA0319-like	hsa-miR-199a-3p	Downregulated	-0.56
ITPK1	ENST00000267615.6	inositol-tetrakisphosphate 1-kinase	hsa-miR-199a-3p	Downregulated	-0.56
TMEM256-PLSCR3	ENST00000324822.11	TMEM256-PLSCR3 readthrough (NMD candidate)	hsa-miR-124-3p.1	Upregulated	-0.56
CREBRF	ENST00000540014.1	CREB3 regulatory factor	hsa-miR-124-3p.1	Upregulated	-0.56
GNG10	ENST00000374293.4	guanine nucleotide binding protein (G protein), gamma 10	hsa-miR-124-3p.1	Upregulated	-0.56
IL11	ENST00000264563.2	interleukin 11	hsa-miR-124-3p.1	Upregulated	-0.56
POLR3G	ENST00000504930.1	polymerase (RNA) III (DNA directed) polypeptide G (32kD)	hsa-miR-124-3p.1	Upregulated	-0.56
ECI2	ENST00000380118.3	enoyl-CoA delta isomerase 2	hsa-miR-124-3p.1	Upregulated	-0.56
TMED1	ENST00000214869.2	transmembrane emp24 protein transport domain containing 1	hsa-miR-124-3p.1	Upregulated	-0.56
FRMD8	ENST00000317568.5	FERM domain containing 8	hsa-miR-124-3p.1	Upregulated	-0.56
KPNA4	ENST00000334256.4	karyopherin alpha 4 (importin alpha 3)	hsa-miR-129-1-3p	Upregulated	-0.56
FRMD3	ENST00000304195.3	FERM domain containing 3	hsa-miR-129-1-3p	Upregulated	-0.56
GRIN2B	ENST00000609686.1	glutamate receptor, ionotropic, N-methyl D-aspartate 2B	hsa-miR-129-1-3p	Upregulated	-0.56
SFXN2	ENST00000369893.5	sideroflexin 2	hsa-miR-9-5p	Upregulated	-0.56
RNF146	ENST00000356799.2	ring finger protein 146	hsa-miR-9-5p	Upregulated	-0.56
C9orf89	ENST00000375464.2	chromosome 9 open reading frame 89	hsa-miR-9-5p	Upregulated	-0.56
DOK6	ENST00000382713.5	docking protein 6	hsa-miR-219a-5p	Upregulated	-0.56
ARF6	ENST00000298316.5	ADP-ribosylation factor 6	hsa-miR-199b-5p	Downregulated	-0.55
PPP1R2	ENST00000328432.3	protein phosphatase 1, regulatory (inhibitor) subunit 2	hsa-miR-199a-5p	Downregulated	-0.55
FAM107B	ENST00000378470.1	family with sequence similarity 107, member B	hsa-miR-199a-5p	Downregulated	-0.55
ACPT	ENST00000270593.1	acid phosphatase, testicular	hsa-miR-199a-5p	Downregulated	-0.55
ARHGAP12	ENST00000311380.4	Rho GTPase activating protein 12	hsa-miR-199a-5p	Downregulated	-0.55
TAF9B	ENST00000341864.5	TAF9B RNA polymerase II, TATA box binding protein (TBP)-associated factor, 31kDa	hsa-miR-199a-5p	Downregulated	-0.55
FAM60A	ENST00000539409.1	family with sequence similarity 60, member A	hsa-miR-199a-3p	Downregulated	-0.55
GREM1	ENST00000560677.1	gremlin 1, DAN family BMP antagonist	hsa-miR-199a-3p	Downregulated	-0.55
RNGTT	ENST00000369485.4	RNA guanylyltransferase and 5'-phosphatase	hsa-miR-199a-3p	Downregulated	-0.55
DCUN1D4	ENST00000334635.5	DCN1, defective in cullin neddylation 1, domain containing 4	hsa-miR-142-3p.1	Downregulated	-0.55
STT3A	ENST00000392708.4	STT3A, subunit of the oligosaccharyltransferase complex (catalytic)	hsa-miR-124-3p.1	Upregulated	-0.55
ATP6V0E1	ENST00000519374.1	ATPase, H+ transporting, lysosomal 9kDa, V0 subunit e1	hsa-miR-124-3p.1	Upregulated	-0.55
EDEM1	ENST00000256497.4	ER degradation enhancer, mannosidase alpha-like 1	hsa-miR-124-3p.1	Upregulated	-0.55
EYA4	ENST00000367895.5	eyes absent homolog 4 (Drosophila)	hsa-miR-124-3p.1	Upregulated	-0.55
CBL	ENST00000264033.4	Cbl proto-oncogene, E3 ubiquitin protein ligase	hsa-miR-124-3p.1	Upregulated	-0.55
C10orf12	ENST00000286067.2	chromosome 10 open reading frame 12	hsa-miR-124-3p.1	Upregulated	-0.55
PCDH8	ENST00000377942.3	protocadherin 8	hsa-miR-124-3p.1	Upregulated	-0.55
NAT8L	ENST00000331662.3	N-acetyltransferase 8-like (GCN5-related, putative)	hsa-miR-124-3p.1	Upregulated	-0.55
BLOC1S6	ENST00000220531.3	biogenesis of lysosomal organelles complex-1, subunit 6, pallidin	hsa-miR-124-3p.1	Upregulated	-0.55
CTSH	ENST00000220166.5	cathepsin H	hsa-miR-124-3p.1	Upregulated	-0.55
ZNF200	ENST00000396868.3	zinc finger protein 200	hsa-miR-129-1-3p	Upregulated	-0.55
SPATA2	ENST00000289431.5	spermatogenesis associated 2	hsa-miR-129-1-3p	Upregulated	-0.55
LHFP	ENST00000379589.3	lipoma HMGIC fusion partner	hsa-miR-129-1-3p	Upregulated	-0.55
CLDN14	ENST00000399139.1	claudin 14	hsa-miR-9-5p	Upregulated	-0.55
C2orf88	ENST00000340623.4	chromosome 2 open reading frame 88	hsa-miR-9-5p	Upregulated	-0.55
GPR89A	ENST00000313835.9	G protein-coupled receptor 89A	hsa-miR-199a-5p	Downregulated	-0.54
RASSF2	ENST00000379400.3	Ras association (RalGDS/AF-6) domain family member 2	hsa-miR-199a-5p	Downregulated	-0.54
TMEM66	ENST00000256255.6	transmembrane protein 66	hsa-miR-199a-5p	Downregulated	-0.54
METTL21A	ENST00000448823.2	methyltransferase like 21A	hsa-miR-199b-5p	Downregulated	-0.54
ADAMTSL3	ENST00000286744.5	ADAMTS-like 3	hsa-miR-199a-3p	Downregulated	-0.54
ARL15	ENST00000502271.1	ADP-ribosylation factor-like 15	hsa-miR-199a-3p	Downregulated	-0.54
MTCH2	ENST00000302503.3	mitochondrial carrier 2	hsa-miR-150-5p	Downregulated	-0.54
AKT1S1	ENST00000391833.1	AKT1 substrate 1 (proline-rich)	hsa-miR-142-3p.1	Downregulated	-0.54
TMEM59	ENST00000371348.1	transmembrane protein 59	hsa-miR-142-3p.1	Downregulated	-0.54
CHP1	ENST00000334660.5	calcineurin-like EF-hand protein 1	hsa-miR-124-3p.1	Upregulated	-0.54
LMAN2L	ENST00000264963.4	lectin, mannose-binding 2-like	hsa-miR-124-3p.1	Upregulated	-0.54
ZSCAN22	ENST00000329665.4	zinc finger and SCAN domain containing 22	hsa-miR-124-3p.1	Upregulated	-0.54
GALNT10	ENST00000297107.6	UDP-N-acetyl-alpha-D-galactosamine:polypeptide N-acetylgalactosaminyltransferase 10 (GalNAc-T10)	hsa-miR-124-3p.1	Upregulated	-0.54
TTC7A	ENST00000319190.5	tetratricopeptide repeat domain 7A	hsa-miR-124-3p.1	Upregulated	-0.54
PARP16	ENST00000261888.6	poly (ADP-ribose) polymerase family, member 16	hsa-miR-124-3p.1	Upregulated	-0.54
SLC30A2	ENST00000374278.3	solute carrier family 30 (zinc transporter), member 2	hsa-miR-124-3p.1	Upregulated	-0.54
RCAN2	ENST00000330430.6	regulator of calcineurin 2	hsa-miR-129-1-3p	Upregulated	-0.54
FAM220A	ENST00000313324.4	family with sequence similarity 220, member A	hsa-miR-129-1-3p	Upregulated	-0.54
KLHL13	ENST00000371882.1	kelch-like family member 13	hsa-miR-129-1-3p	Upregulated	-0.54
CXCL11	ENST00000306621.3	chemokine (C-X-C motif) ligand 11	hsa-miR-9-5p	Upregulated	-0.54
SOCS5	ENST00000306503.5	suppressor of cytokine signaling 5	hsa-miR-9-5p	Upregulated	-0.54
VAV3	ENST00000370056.4	vav 3 guanine nucleotide exchange factor	hsa-miR-9-5p	Upregulated	-0.54
RPN2	ENST00000237530.6	ribophorin II	hsa-miR-219a-2-3p	Upregulated	-0.54
UBL3	ENST00000380680.4	ubiquitin-like 3	hsa-miR-199b-5p	Downregulated	-0.53
GPR89C	ENST00000447947.2	G protein-coupled receptor 89C	hsa-miR-199a-5p	Downregulated	-0.53
ABHD17C	ENST00000258884.4	abhydrolase domain containing 17C	hsa-miR-199a-5p	Downregulated	-0.53
UBE2W	ENST00000517608.1	ubiquitin-conjugating enzyme E2W (putative)	hsa-miR-199a-3p	Downregulated	-0.53
ITGB8	ENST00000222573.4	integrin, beta 8	hsa-miR-199a-3p	Downregulated	-0.53
HAVCR1	ENST00000523175.1	hepatitis A virus cellular receptor 1	hsa-miR-142-3p.1	Downregulated	-0.53
SLC35A1	ENST00000369557.5	solute carrier family 35 (CMP-sialic acid transporter), member A1	hsa-miR-142-3p.1	Downregulated	-0.53
ANK3	ENST00000280772.2	ankyrin 3, node of Ranvier (ankyrin G)	hsa-miR-142-3p.1	Downregulated	-0.53
ZEB2	ENST00000558170.2	zinc finger E-box binding homeobox 2	hsa-miR-142-3p.1	Downregulated	-0.53
ZBTB41	ENST00000367405.4	zinc finger and BTB domain containing 41	hsa-miR-142-3p.1	Downregulated	-0.53
PPP1R37	ENST00000221462.4	protein phosphatase 1, regulatory subunit 37	hsa-miR-142-3p.1	Downregulated	-0.53
RAB11FIP2	ENST00000355624.3	RAB11 family interacting protein 2 (class I)	hsa-miR-142-3p.1	Downregulated	-0.53
SLC16A13	ENST00000308027.6	solute carrier family 16, member 13	hsa-miR-124-3p.1	Upregulated	-0.53
ALG2	ENST00000476832.1	ALG2, alpha-1,3/1,6-mannosyltransferase	hsa-miR-124-3p.1	Upregulated	-0.53
CTNND1	ENST00000524630.1	catenin (cadherin-associated protein), delta 1	hsa-miR-124-3p.1	Upregulated	-0.53
RAD17	ENST00000361732.2	RAD17 homolog (S. pombe)	hsa-miR-124-3p.1	Upregulated	-0.53
MAP2K4	ENST00000415385.3	mitogen-activated protein kinase kinase 4	hsa-miR-124-3p.1	Upregulated	-0.53
PGRMC2	ENST00000296425.5	progesterone receptor membrane component 2	hsa-miR-124-3p.1	Upregulated	-0.53
SNTB2	ENST00000336278.4	syntrophin, beta 2 (dystrophin-associated protein A1, 59kDa, basic component 2)	hsa-miR-124-3p.1	Upregulated	-0.53
RAB3D	ENST00000222120.3	RAB3D, member RAS oncogene family	hsa-miR-124-3p.1	Upregulated	-0.53
KCNK10	ENST00000340700.5	potassium channel, subfamily K, member 10	hsa-miR-124-3p.1	Upregulated	-0.53
RARG	ENST00000425354.2	retinoic acid receptor, gamma	hsa-miR-124-3p.1	Upregulated	-0.53
RAD51L3-RFFL	ENST00000593039.1	Uncharacterized protein	hsa-miR-124-3p.1	Upregulated	-0.53
GPRIN2	ENST00000374314.4	G protein regulated inducer of neurite outgrowth 2	hsa-miR-129-1-3p	Upregulated	-0.53
RANBP17	ENST00000523189.1	RAN binding protein 17	hsa-miR-9-5p	Upregulated	-0.53
MESDC1	ENST00000267984.2	mesoderm development candidate 1	hsa-miR-9-5p	Upregulated	-0.53
BTF3	ENST00000380591.3	basic transcription factor 3	hsa-miR-219a-2-3p	Upregulated	-0.53
CCDC28A	ENST00000332797.6	coiled-coil domain containing 28A	hsa-miR-219a-5p	Upregulated	-0.53
ELMOD2	ENST00000323570.3	ELMO/CED-12 domain containing 2	hsa-miR-219a-5p	Upregulated	-0.53
ASRGL1	ENST00000415229.2	asparaginase like 1	hsa-miR-199a-5p	Downregulated	-0.52
SLC25A23	ENST00000301454.4	solute carrier family 25 (mitochondrial carrier; phosphate carrier), member 23	hsa-miR-199a-5p	Downregulated	-0.52
C9orf72	ENST00000380003.3	chromosome 9 open reading frame 72	hsa-miR-142-3p.1	Downregulated	-0.52
MARCKS	ENST00000368635.4	myristoylated alanine-rich protein kinase C substrate	hsa-miR-142-3p.1	Downregulated	-0.52
STAM	ENST00000377524.3	signal transducing adaptor molecule (SH3 domain and ITAM motif) 1	hsa-miR-142-3p.1	Downregulated	-0.52
PRLR	ENST00000342362.5	prolactin receptor	hsa-miR-142-3p.1	Downregulated	-0.52
CCNT2	ENST00000295238.6	cyclin T2	hsa-miR-142-3p.1	Downregulated	-0.52
MOB4	ENST00000233892.4	MOB family member 4, phocein	hsa-miR-142-3p.1	Downregulated	-0.52
PTBP3	ENST00000374257.1	polypyrimidine tract binding protein 3	hsa-miR-124-3p.1	Upregulated	-0.52
PTTG1IP	ENST00000397887.3	pituitary tumor-transforming 1 interacting protein	hsa-miR-124-3p.1	Upregulated	-0.52
TBX19	ENST00000367821.3	T-box 19	hsa-miR-124-3p.1	Upregulated	-0.52
FRMD4B	ENST00000398540.3	FERM domain containing 4B	hsa-miR-124-3p.1	Upregulated	-0.52
TOR3A	ENST00000367627.3	torsin family 3, member A	hsa-miR-124-3p.1	Upregulated	-0.52
TMEM109	ENST00000227525.3	transmembrane protein 109	hsa-miR-124-3p.1	Upregulated	-0.52
TCTA	ENST00000273590.3	T-cell leukemia translocation altered	hsa-miR-124-3p.1	Upregulated	-0.52
SDF2L1	ENST00000248958.4	stromal cell-derived factor 2-like 1	hsa-miR-124-3p.1	Upregulated	-0.52
ELK3	ENST00000228741.3	ELK3, ETS-domain protein (SRF accessory protein 2)	hsa-miR-124-3p.1	Upregulated	-0.52
MDK	ENST00000359803.3	midkine (neurite growth-promoting factor 2)	hsa-miR-124-3p.1	Upregulated	-0.52
SMAD5	ENST00000545279.1	SMAD family member 5	hsa-miR-124-3p.1	Upregulated	-0.52
MYZAP	ENST00000267853.5	myocardial zonula adherens protein	hsa-miR-124-3p.1	Upregulated	-0.52
NUP98	ENST00000359171.4	nucleoporin 98kDa	hsa-miR-129-1-3p	Upregulated	-0.52
SLC24A2	ENST00000341998.2	solute carrier family 24 (sodium/potassium/calcium exchanger), member 2	hsa-miR-129-1-3p	Upregulated	-0.52
MAGT1	ENST00000358075.6	magnesium transporter 1	hsa-miR-9-5p	Upregulated	-0.52
PI4KA	ENST00000255882.6	phosphatidylinositol 4-kinase, catalytic, alpha	hsa-miR-219a-5p	Upregulated	-0.52
GBA2	ENST00000378088.1	glucosidase, beta (bile acid) 2	hsa-miR-219a-5p	Upregulated	-0.52
CCNJ	ENST00000265992.5	cyclin J	hsa-miR-199a-5p	Downregulated	-0.51
LEPREL1	ENST00000319332.5	leprecan-like 1	hsa-miR-199b-5p	Downregulated	-0.51
SUN1	ENST00000456758.2	Sad1 and UNC84 domain containing 1	hsa-miR-199a-5p	Downregulated	-0.51
SOS2	ENST00000216373.5	son of sevenless homolog 2 (Drosophila)	hsa-miR-199a-5p	Downregulated	-0.51
LLGL2	ENST00000392550.3	lethal giant larvae homolog 2 (Drosophila)	hsa-miR-199a-3p	Downregulated	-0.51
ADRBK2	ENST00000324198.6	adrenergic, beta, receptor kinase 2	hsa-miR-199a-3p	Downregulated	-0.51
CXADR	ENST00000356275.6	coxsackie virus and adenovirus receptor	hsa-miR-142-3p.1	Downregulated	-0.51
ITGB8	ENST00000222573.4	integrin, beta 8	hsa-miR-142-3p.1	Downregulated	-0.51
FAM129B	ENST00000373314.3	family with sequence similarity 129, member B	hsa-miR-124-3p.1	Upregulated	-0.51
CXADR	ENST00000356275.6	coxsackie virus and adenovirus receptor	hsa-miR-124-3p.1	Upregulated	-0.51
MIB1	ENST00000261537.6	mindbomb E3 ubiquitin protein ligase 1	hsa-miR-124-3p.1	Upregulated	-0.51
KLHL24	ENST00000454652.2	kelch-like family member 24	hsa-miR-124-3p.1	Upregulated	-0.51
GPT2	ENST00000340124.4	glutamic pyruvate transaminase (alanine aminotransferase) 2	hsa-miR-124-3p.1	Upregulated	-0.51
EVI5	ENST00000370331.1	ecotropic viral integration site 5	hsa-miR-124-3p.1	Upregulated	-0.51
WASF2	ENST00000536657.1	WAS protein family, member 2	hsa-miR-124-3p.1	Upregulated	-0.51
DNAJC25-GNG10	ENST00000374294.3	DNAJC25-GNG10 readthrough	hsa-miR-124-3p.1	Upregulated	-0.51
VIM	ENST00000224237.5	vimentin	hsa-miR-124-3p.1	Upregulated	-0.51
LYSMD3	ENST00000509384.1	LysM, putative peptidoglycan-binding, domain containing 3	hsa-miR-124-3p.1	Upregulated	-0.51
MAPK3	ENST00000403394.1	mitogen-activated protein kinase 3	hsa-miR-129-1-3p	Upregulated	-0.51
CACNA1D	ENST00000288139.4	calcium channel, voltage-dependent, L type, alpha 1D subunit	hsa-miR-129-1-3p	Upregulated	-0.51
FAM83B	ENST00000306858.7	family with sequence similarity 83, member B	hsa-miR-9-5p	Upregulated	-0.51
CCNDBP1	ENST00000300213.4	cyclin D-type binding-protein 1	hsa-miR-9-5p	Upregulated	-0.51
TGFBI	ENST00000442011.2	transforming growth factor, beta-induced, 68kDa	hsa-miR-9-5p	Upregulated	-0.51
GALNT3	ENST00000392701.3	UDP-N-acetyl-alpha-D-galactosamine:polypeptide N-acetylgalactosaminyltransferase 3 (GalNAc-T3)	hsa-miR-9-5p	Upregulated	-0.51
C1GALT1	ENST00000223122.3	core 1 synthase, glycoprotein-N-acetylgalactosamine 3-beta-galactosyltransferase, 1	hsa-miR-199b-5p	Downregulated	-0.5
RAB9B	ENST00000243298.2	RAB9B, member RAS oncogene family	hsa-miR-199b-5p	Downregulated	-0.5
MARCH8	ENST00000453424.2	membrane-associated ring finger (C3HC4) 8, E3 ubiquitin protein ligase	hsa-miR-199a-5p	Downregulated	-0.5
PHYHIPL	ENST00000373880.4	phytanoyl-CoA 2-hydroxylase interacting protein-like	hsa-miR-199a-3p	Downregulated	-0.5
G3BP2	ENST00000395719.3	GTPase activating protein (SH3 domain) binding protein 2	hsa-miR-199a-3p	Downregulated	-0.5
TFAM	ENST00000487519.1	transcription factor A, mitochondrial	hsa-miR-199a-3p	Downregulated	-0.5
DCAF6	ENST00000367843.3	DDB1 and CUL4 associated factor 6	hsa-miR-150-5p	Downregulated	-0.5
MORF4L2	ENST00000360458.1	mortality factor 4 like 2	hsa-miR-142-3p.1	Downregulated	-0.5
CDC14A	ENST00000370125.2	cell division cycle 14A	hsa-miR-142-3p.1	Downregulated	-0.5
PSMB5	ENST00000493471.2	proteasome (prosome, macropain) subunit, beta type, 5	hsa-miR-142-3p.1	Downregulated	-0.5
ARL1	ENST00000261636.8	ADP-ribosylation factor-like 1	hsa-miR-142-3p.1	Downregulated	-0.5
APLN	ENST00000307484.6	apelin	hsa-miR-124-3p.1	Upregulated	-0.5
ZKSCAN8	ENST00000330236.6	zinc finger with KRAB and SCAN domains 8	hsa-miR-124-3p.1	Upregulated	-0.5
SCAMP2	ENST00000268099.9	secretory carrier membrane protein 2	hsa-miR-124-3p.1	Upregulated	-0.5
CTDSP2	ENST00000398073.2	CTD (carboxy-terminal domain, RNA polymerase II, polypeptide A) small phosphatase 2	hsa-miR-124-3p.1	Upregulated	-0.5
THAP2	ENST00000308086.2	THAP domain containing, apoptosis associated protein 2	hsa-miR-124-3p.1	Upregulated	-0.5
TSPAN15	ENST00000373290.2	tetraspanin 15	hsa-miR-124-3p.1	Upregulated	-0.5
DNAJC25	ENST00000556107.1	DnaJ (Hsp40) homolog, subfamily C , member 25	hsa-miR-124-3p.1	Upregulated	-0.5
FAM46D	ENST00000538312.1	family with sequence similarity 46, member D	hsa-miR-9-5p	Upregulated	-0.5
GABRB2	ENST00000393959.1	gamma-aminobutyric acid (GABA) A receptor, beta 2	hsa-miR-9-5p	Upregulated	-0.5
PPCS	ENST00000372556.3	phosphopantothenoylcysteine synthetase	hsa-miR-9-5p	Upregulated	-0.5
OTX2	ENST00000339475.5	orthodenticle homeobox 2	hsa-miR-219a-5p	Upregulated	-0.5
NINL	ENST00000278886.6	ninein-like	hsa-miR-199a-5p	Downregulated	-0.49
CACUL1	ENST00000369151.3	CDK2-associated, cullin domain 1	hsa-miR-199a-5p	Downregulated	-0.49
ZNF579	ENST00000325421.4	zinc finger protein 579	hsa-miR-199a-5p	Downregulated	-0.49
ZHX1	ENST00000395571.3	zinc fingers and homeoboxes 1	hsa-miR-199a-3p	Downregulated	-0.49
CNEP1R1	ENST00000562576.1	CTD nuclear envelope phosphatase 1 regulatory subunit 1	hsa-miR-199a-3p	Downregulated	-0.49
TAB2	ENST00000367456.1	TGF-beta activated kinase 1/MAP3K7 binding protein 2	hsa-miR-142-3p.1	Downregulated	-0.49
NCK2	ENST00000451463.2	NCK adaptor protein 2	hsa-miR-142-3p.1	Downregulated	-0.49
C3orf38	ENST00000486971.1	chromosome 3 open reading frame 38	hsa-miR-124-3p.1	Upregulated	-0.49
HRCT1	ENST00000354323.2	histidine rich carboxyl terminus 1	hsa-miR-124-3p.1	Upregulated	-0.49
RBMS1	ENST00000348849.3	RNA binding motif, single stranded interacting protein 1	hsa-miR-124-3p.1	Upregulated	-0.49
RFFL	ENST00000315249.7	ring finger and FYVE-like domain containing E3 ubiquitin protein ligase	hsa-miR-124-3p.1	Upregulated	-0.49
SLC30A7	ENST00000370112.4	solute carrier family 30 (zinc transporter), member 7	hsa-miR-124-3p.1	Upregulated	-0.49
SLC35G1	ENST00000371408.3	solute carrier family 35, member G1	hsa-miR-124-3p.1	Upregulated	-0.49
SFT2D2	ENST00000271375.4	SFT2 domain containing 2	hsa-miR-124-3p.1	Upregulated	-0.49
TFEB	ENST00000230323.4	transcription factor EB	hsa-miR-124-3p.1	Upregulated	-0.49
HRK	ENST00000257572.5	harakiri, BCL2 interacting protein (contains only BH3 domain)	hsa-miR-129-1-3p	Upregulated	-0.49
CAPZA1	ENST00000263168.3	capping protein (actin filament) muscle Z-line, alpha 1	hsa-miR-9-5p	Upregulated	-0.49
TNC	ENST00000340094.3	tenascin C	hsa-miR-9-5p	Upregulated	-0.49
SLC10A3	ENST00000369649.4	solute carrier family 10, member 3	hsa-miR-9-5p	Upregulated	-0.49
TESK2	ENST00000372084.1	testis-specific kinase 2	hsa-miR-9-5p	Upregulated	-0.49
POU2F2	ENST00000342301.4	POU class 2 homeobox 2	hsa-miR-9-5p	Upregulated	-0.49
STK3	ENST00000419617.2	serine/threonine kinase 3	hsa-miR-9-5p	Upregulated	-0.49
ISL1	ENST00000230658.7	ISL LIM homeobox 1	hsa-miR-219a-5p	Upregulated	-0.49
CRLF3	ENST00000324238.6	cytokine receptor-like factor 3	hsa-miR-219a-5p	Upregulated	-0.49
CXXC5	ENST00000302517.3	CXXC finger protein 5	hsa-miR-219a-5p	Upregulated	-0.49
BICC1	ENST00000373886.3	bicaudal C homolog 1 (Drosophila)	hsa-miR-199b-5p	Downregulated	-0.48
UNG	ENST00000242576.2	uracil-DNA glycosylase	hsa-miR-199a-5p	Downregulated	-0.48
NAA40	ENST00000377793.4	N(alpha)-acetyltransferase 40, NatD catalytic subunit	hsa-miR-199a-5p	Downregulated	-0.48
RGMA	ENST00000557420.1	RGM domain family, member A	hsa-miR-199a-5p	Downregulated	-0.48
RPS6KA6	ENST00000262752.2	ribosomal protein S6 kinase, 90kDa, polypeptide 6	hsa-miR-199a-3p	Downregulated	-0.48
RNF14	ENST00000394520.2	ring finger protein 14	hsa-miR-199a-3p	Downregulated	-0.48
PIK3CB	ENST00000477593.1	phosphatidylinositol-4,5-bisphosphate 3-kinase, catalytic subunit beta	hsa-miR-199a-3p	Downregulated	-0.48
KTN1	ENST00000416613.1	kinectin 1 (kinesin receptor)	hsa-miR-199a-3p	Downregulated	-0.48
ELOVL3	ENST00000370005.3	ELOVL fatty acid elongase 3	hsa-miR-150-5p	Downregulated	-0.48
MYLK	ENST00000360772.3	myosin light chain kinase	hsa-miR-142-3p.1	Downregulated	-0.48
NME4	ENST00000219479.2	NME/NM23 nucleoside diphosphate kinase 4	hsa-miR-124-3p.1	Upregulated	-0.48
PROX1	ENST00000366958.4	prospero homeobox 1	hsa-miR-124-3p.1	Upregulated	-0.48
SMOX	ENST00000339123.6	spermine oxidase	hsa-miR-124-3p.1	Upregulated	-0.48
ARPC1B	ENST00000252725.5	actin related protein 2/3 complex, subunit 1B, 41kDa	hsa-miR-124-3p.1	Upregulated	-0.48
MAPK14	ENST00000229795.3	mitogen-activated protein kinase 14	hsa-miR-124-3p.1	Upregulated	-0.48
FPGS	ENST00000373245.1	folylpolyglutamate synthase	hsa-miR-124-3p.1	Upregulated	-0.48
QSER1	ENST00000399302.2	glutamine and serine rich 1	hsa-miR-124-3p.1	Upregulated	-0.48
PIM1	ENST00000373509.5	pim-1 oncogene	hsa-miR-124-3p.1	Upregulated	-0.48
TMEM104	ENST00000335464.5	transmembrane protein 104	hsa-miR-124-3p.1	Upregulated	-0.48
RYR1	ENST00000355481.4	ryanodine receptor 1 (skeletal)	hsa-miR-124-3p.1	Upregulated	-0.48
TMEM128	ENST00000254742.2	transmembrane protein 128	hsa-miR-124-3p.1	Upregulated	-0.48
C4orf46	ENST00000508457.1	chromosome 4 open reading frame 46	hsa-miR-124-3p.1	Upregulated	-0.48
SBNO2	ENST00000361757.3	strawberry notch homolog 2 (Drosophila)	hsa-miR-124-3p.1	Upregulated	-0.48
C14orf1	ENST00000256319.6	chromosome 14 open reading frame 1	hsa-miR-129-1-3p	Upregulated	-0.48
CCNG1	ENST00000340828.2	cyclin G1	hsa-miR-9-5p	Upregulated	-0.48
IPO4	ENST00000354464.6	importin 4	hsa-miR-9-5p	Upregulated	-0.48
FBN1	ENST00000316623.5	fibrillin 1	hsa-miR-9-5p	Upregulated	-0.48
PHLDB2	ENST00000431670.2	pleckstrin homology-like domain, family B, member 2	hsa-miR-9-5p	Upregulated	-0.48
SCRIB	ENST00000356994.2	scribbled planar cell polarity protein	hsa-miR-9-5p	Upregulated	-0.48
TNFAIP8	ENST00000504771.2	tumor necrosis factor, alpha-induced protein 8	hsa-miR-9-5p	Upregulated	-0.48
RNF150	ENST00000515673.2	ring finger protein 150	hsa-miR-9-5p	Upregulated	-0.48
NID2	ENST00000216286.5	nidogen 2 (osteonidogen)	hsa-miR-9-5p	Upregulated	-0.48
RP11-122A3.2	ENST00000517562.2	uncharacterized protein LOC100127983	hsa-miR-219a-2-3p	Upregulated	-0.48
LEF1	ENST00000265165.1	lymphoid enhancer-binding factor 1	hsa-miR-219a-5p	Upregulated	-0.48
TSC22D2	ENST00000361875.3	TSC22 domain family, member 2	hsa-miR-219a-5p	Upregulated	-0.48
GBP5	ENST00000343435.5	guanylate binding protein 5	hsa-miR-219a-5p	Upregulated	-0.48
FGFR1OP	ENST00000366847.4	FGFR1 oncogene partner	hsa-miR-219a-5p	Upregulated	-0.48
DAZAP1	ENST00000336761.6	DAZ associated protein 1	hsa-miR-219a-5p	Upregulated	-0.48
GRB10	ENST00000398812.2	growth factor receptor-bound protein 10	hsa-miR-199a-5p	Downregulated	-0.47
CDK17	ENST00000543119.2	cyclin-dependent kinase 17	hsa-miR-199a-3p	Downregulated	-0.47
CPEB2	ENST00000538197.1	cytoplasmic polyadenylation element binding protein 2	hsa-miR-142-3p.1	Downregulated	-0.47
NKX2-3	ENST00000344586.7	NK2 homeobox 3	hsa-miR-142-3p.1	Downregulated	-0.47
SIK1	ENST00000270162.6	salt-inducible kinase 1	hsa-miR-142-3p.1	Downregulated	-0.47
SLC1A3	ENST00000265113.4	solute carrier family 1 (glial high affinity glutamate transporter), member 3	hsa-miR-142-3p.1	Downregulated	-0.47
HSPE1-MOB4	ENST00000604458.1	HSPE1-MOB4 readthrough	hsa-miR-142-3p.1	Downregulated	-0.47
EPN1	ENST00000270460.6	epsin 1	hsa-miR-142-3p.1	Downregulated	-0.47
TARDBP	ENST00000240185.3	TAR DNA binding protein	hsa-miR-142-3p.1	Downregulated	-0.47
KCNK2	ENST00000444842.2	potassium channel, subfamily K, member 2	hsa-miR-124-3p.1	Upregulated	-0.47
SMARCAD1	ENST00000354268.4	SWI/SNF-related, matrix-associated actin-dependent regulator of chromatin, subfamily a, containing DEAD/H box 1	hsa-miR-124-3p.1	Upregulated	-0.47
EIF3B	ENST00000360876.4	eukaryotic translation initiation factor 3, subunit B	hsa-miR-124-3p.1	Upregulated	-0.47
GGA2	ENST00000309859.4	golgi-associated, gamma adaptin ear containing, ARF binding protein 2	hsa-miR-124-3p.1	Upregulated	-0.47
STOM	ENST00000286713.2	stomatin	hsa-miR-124-3p.1	Upregulated	-0.47
CC2D1B	ENST00000371586.2	coiled-coil and C2 domain containing 1B	hsa-miR-124-3p.1	Upregulated	-0.47
PPP6C	ENST00000373547.4	protein phosphatase 6, catalytic subunit	hsa-miR-129-1-3p	Upregulated	-0.47
PKIA	ENST00000396418.2	protein kinase (cAMP-dependent, catalytic) inhibitor alpha	hsa-miR-129-1-3p	Upregulated	-0.47
NXPE3	ENST00000422132.1	neurexophilin and PC-esterase domain family, member 3	hsa-miR-9-5p	Upregulated	-0.47
LEPRE1	ENST00000236040.4	leucine proline-enriched proteoglycan (leprecan) 1	hsa-miR-9-5p	Upregulated	-0.47
CALB2	ENST00000349553.5	calbindin 2	hsa-miR-9-5p	Upregulated	-0.47
FOXN2	ENST00000340553.3	forkhead box N2	hsa-miR-9-5p	Upregulated	-0.47
MDGA2	ENST00000439988.3	MAM domain-containing glycosylphosphatidylinositol anchor protein 2	hsa-miR-9-5p	Upregulated	-0.47
KLF5	ENST00000377687.4	Kruppel-like factor 5 (intestinal)	hsa-miR-9-5p	Upregulated	-0.47
LAPTM4A	ENST00000175091.4	lysosomal protein transmembrane 4 alpha	hsa-miR-219a-5p	Upregulated	-0.47
KCNA4	ENST00000328224.6	potassium voltage-gated channel, shaker-related subfamily, member 4	hsa-miR-219a-5p	Upregulated	-0.47
ELOVL7	ENST00000508821.1	ELOVL fatty acid elongase 7	hsa-miR-219a-5p	Upregulated	-0.47
FAM188A	ENST00000378036.1	family with sequence similarity 188, member A	hsa-miR-199a-5p	Downregulated	-0.46
ZNF528	ENST00000391788.2	zinc finger protein 528	hsa-miR-199a-5p	Downregulated	-0.46
CCNL1	ENST00000295926.3	cyclin L1	hsa-miR-199b-5p	Downregulated	-0.46
GNG5	ENST00000370645.4	guanine nucleotide binding protein (G protein), gamma 5	hsa-miR-199a-5p	Downregulated	-0.46
FUBP1	ENST00000370767.1	far upstream element (FUSE) binding protein 1	hsa-miR-199a-3p	Downregulated	-0.46
SAMD12	ENST00000409003.4	sterile alpha motif domain containing 12	hsa-miR-199a-3p	Downregulated	-0.46
C5orf24	ENST00000394976.3	chromosome 5 open reading frame 24	hsa-miR-142-3p.1	Downregulated	-0.46
STX12	ENST00000373943.4	syntaxin 12	hsa-miR-142-3p.1	Downregulated	-0.46
BAZ1A	ENST00000358716.4	bromodomain adjacent to zinc finger domain, 1A	hsa-miR-142-3p.1	Downregulated	-0.46
FOXO4	ENST00000374259.3	forkhead box O4	hsa-miR-142-3p.1	Downregulated	-0.46
ASH1L	ENST00000368346.3	ash1 (absent, small, or homeotic)-like (Drosophila)	hsa-miR-142-3p.1	Downregulated	-0.46
RHEB	ENST00000262187.5	Ras homolog enriched in brain	hsa-miR-142-3p.1	Downregulated	-0.46
MAP3K11	ENST00000309100.3	mitogen-activated protein kinase kinase kinase 11	hsa-miR-142-3p.1	Downregulated	-0.46
GINM1	ENST00000367419.5	glycoprotein integral membrane 1	hsa-miR-124-3p.1	Upregulated	-0.46
KIAA1161	ENST00000297625.7	KIAA1161	hsa-miR-124-3p.1	Upregulated	-0.46
EPHX4	ENST00000370383.4	epoxide hydrolase 4	hsa-miR-124-3p.1	Upregulated	-0.46
ATP7A	ENST00000343533.5	ATPase, Cu++ transporting, alpha polypeptide	hsa-miR-124-3p.1	Upregulated	-0.46
PECR	ENST00000265322.7	peroxisomal trans-2-enoyl-CoA reductase	hsa-miR-124-3p.1	Upregulated	-0.46
OVOL2	ENST00000278780.6	ovo-like 2 (Drosophila)	hsa-miR-124-3p.1	Upregulated	-0.46
CYB5A	ENST00000299438.9	cytochrome b5 type A (microsomal)	hsa-miR-124-3p.1	Upregulated	-0.46
EML6	ENST00000356458.6	echinoderm microtubule associated protein like 6	hsa-miR-124-3p.1	Upregulated	-0.46
LHX2	ENST00000373615.4	LIM homeobox 2	hsa-miR-124-3p.1	Upregulated	-0.46
ASCC2	ENST00000307790.3	activating signal cointegrator 1 complex subunit 2	hsa-miR-124-3p.1	Upregulated	-0.46
PLP2	ENST00000376327.5	proteolipid protein 2 (colonic epithelium-enriched)	hsa-miR-124-3p.1	Upregulated	-0.46
RWDD4	ENST00000326397.5	RWD domain containing 4	hsa-miR-124-3p.1	Upregulated	-0.46
PPM1D	ENST00000305921.3	protein phosphatase, Mg2+/Mn2+ dependent, 1D	hsa-miR-129-1-3p	Upregulated	-0.46
AKAP3	ENST00000545990.2	A kinase (PRKA) anchor protein 3	hsa-miR-129-1-3p	Upregulated	-0.46
LEP	ENST00000308868.4	leptin	hsa-miR-9-5p	Upregulated	-0.46
HMGA2	ENST00000403681.2	high mobility group AT-hook 2	hsa-miR-9-5p	Upregulated	-0.46
DYRK1B	ENST00000593685.1	dual-specificity tyrosine-(Y)-phosphorylation regulated kinase 1B	hsa-miR-9-5p	Upregulated	-0.46
CGNL1	ENST00000281282.5	cingulin-like 1	hsa-miR-219a-5p	Upregulated	-0.46
RALGAPA1	ENST00000389698.3	Ral GTPase activating protein, alpha subunit 1 (catalytic)	hsa-miR-199a-5p	Downregulated	-0.45
ZFYVE27	ENST00000453958.2	zinc finger, FYVE domain containing 27	hsa-miR-199a-5p	Downregulated	-0.45
KCND3	ENST00000369697.1	potassium voltage-gated channel, Shal-related subfamily, member 3	hsa-miR-199b-5p	Downregulated	-0.45
AK4	ENST00000545314.1	adenylate kinase 4	hsa-miR-199a-3p	Downregulated	-0.45
CEP85L	ENST00000368491.3	centrosomal protein 85kDa-like	hsa-miR-199a-3p	Downregulated	-0.45
MEDAG	ENST00000380482.4	mesenteric estrogen-dependent adipogenesis	hsa-miR-199a-3p	Downregulated	-0.45
FXR1	ENST00000357559.4	fragile X mental retardation, autosomal homolog 1	hsa-miR-199a-3p	Downregulated	-0.45
ZBTB18	ENST00000358704.4	zinc finger and BTB domain containing 18	hsa-miR-199a-3p	Downregulated	-0.45
WTAP	ENST00000358372.4	Wilms tumor 1 associated protein	hsa-miR-150-5p	Downregulated	-0.45
CMTM6	ENST00000205636.3	CKLF-like MARVEL transmembrane domain containing 6	hsa-miR-150-5p	Downregulated	-0.45
FLVCR1	ENST00000366971.4	feline leukemia virus subgroup C cellular receptor 1	hsa-miR-142-3p.1	Downregulated	-0.45
APC	ENST00000457016.1	adenomatous polyposis coli	hsa-miR-142-3p.1	Downregulated	-0.45
ITGAV	ENST00000261023.3	integrin, alpha V	hsa-miR-142-3p.1	Downregulated	-0.45
INPP5A	ENST00000368594.3	inositol polyphosphate-5-phosphatase, 40kDa	hsa-miR-142-3p.1	Downregulated	-0.45
QKI	ENST00000392127.2	QKI, KH domain containing, RNA binding	hsa-miR-124-3p.1	Upregulated	-0.45
LAMC1	ENST00000258341.4	laminin, gamma 1 (formerly LAMB2)	hsa-miR-124-3p.1	Upregulated	-0.45
CCDC177	ENST00000599174.1	Homo sapiens coiled-coil domain containing 177 (CCDC177), mRNA.	hsa-miR-124-3p.1	Upregulated	-0.45
PHF17	ENST00000226319.6	PHD finger protein 17	hsa-miR-124-3p.1	Upregulated	-0.45
TMCO3	ENST00000434316.2	transmembrane and coiled-coil domains 3	hsa-miR-124-3p.1	Upregulated	-0.45
FBXO38	ENST00000340253.5	F-box protein 38	hsa-miR-124-3p.1	Upregulated	-0.45
IAPP	ENST00000542023.1	islet amyloid polypeptide	hsa-miR-124-3p.1	Upregulated	-0.45
SHPK	ENST00000225519.3	sedoheptulokinase	hsa-miR-124-3p.1	Upregulated	-0.45
AP1M2	ENST00000590923.1	adaptor-related protein complex 1, mu 2 subunit	hsa-miR-124-3p.1	Upregulated	-0.45
RBM33	ENST00000341148.3	RNA binding motif protein 33	hsa-miR-124-3p.1	Upregulated	-0.45
APEX2	ENST00000374987.3	APEX nuclease (apurinic/apyrimidinic endonuclease) 2	hsa-miR-124-3p.1	Upregulated	-0.45
RASSF5	ENST00000367117.3	Ras association (RalGDS/AF-6) domain family member 5	hsa-miR-124-3p.1	Upregulated	-0.45
PLOD3	ENST00000223127.3	procollagen-lysine, 2-oxoglutarate 5-dioxygenase 3	hsa-miR-124-3p.1	Upregulated	-0.45
TSC22D4	ENST00000300181.2	TSC22 domain family, member 4	hsa-miR-124-3p.1	Upregulated	-0.45
SERTAD2	ENST00000313349.3	SERTA domain containing 2	hsa-miR-124-3p.1	Upregulated	-0.45
EPS8	ENST00000543523.1	epidermal growth factor receptor pathway substrate 8	hsa-miR-124-3p.1	Upregulated	-0.45
UNC119B	ENST00000344651.4	unc-119 homolog B (C. elegans)	hsa-miR-124-3p.1	Upregulated	-0.45
KANK1	ENST00000382303.1	KN motif and ankyrin repeat domains 1	hsa-miR-124-3p.1	Upregulated	-0.45
CD151	ENST00000322008.4	CD151 molecule (Raph blood group)	hsa-miR-124-3p.1	Upregulated	-0.45
MORC4	ENST00000535534.1	MORC family CW-type zinc finger 4	hsa-miR-124-3p.1	Upregulated	-0.45
PGM1	ENST00000371084.3	phosphoglucomutase 1	hsa-miR-124-3p.1	Upregulated	-0.45
VPS35	ENST00000299138.7	vacuolar protein sorting 35 homolog (S. cerevisiae)	hsa-miR-124-3p.1	Upregulated	-0.45
RELA	ENST00000525693.1	v-rel avian reticuloendotheliosis viral oncogene homolog A	hsa-miR-124-3p.1	Upregulated	-0.45
DDX3X	ENST00000399959.2	DEAD (Asp-Glu-Ala-Asp) box helicase 3, X-linked	hsa-miR-124-3p.1	Upregulated	-0.45
MSRA	ENST00000317173.4	methionine sulfoxide reductase A	hsa-miR-124-3p.1	Upregulated	-0.45
NFATC2IP	ENST00000320805.4	nuclear factor of activated T-cells, cytoplasmic, calcineurin-dependent 2 interacting protein	hsa-miR-129-1-3p	Upregulated	-0.45
MAEA	ENST00000303400.4	macrophage erythroblast attacher	hsa-miR-9-5p	Upregulated	-0.45
PCGF6	ENST00000337211.4	polycomb group ring finger 6	hsa-miR-9-5p	Upregulated	-0.45
TIGIT	ENST00000486257.1	T cell immunoreceptor with Ig and ITIM domains	hsa-miR-219a-2-3p	Upregulated	-0.45
LYSMD3	ENST00000509384.1	LysM, putative peptidoglycan-binding, domain containing 3	hsa-miR-199a-5p	Downregulated	-0.44
SNAI1	ENST00000244050.2	snail family zinc finger 1	hsa-miR-199a-5p	Downregulated	-0.44
DPP8	ENST00000341861.5	dipeptidyl-peptidase 8	hsa-miR-199a-5p	Downregulated	-0.44
NTNG1	ENST00000370067.1	netrin G1	hsa-miR-199a-5p	Downregulated	-0.44
AP1G1	ENST00000299980.4	adaptor-related protein complex 1, gamma 1 subunit	hsa-miR-199a-5p	Downregulated	-0.44
PPP2R5E	ENST00000337537.3	protein phosphatase 2, regulatory subunit B', epsilon isoform	hsa-miR-199a-3p	Downregulated	-0.44
ADAMTS3	ENST00000286657.4	ADAM metallopeptidase with thrombospondin type 1 motif, 3	hsa-miR-199a-3p	Downregulated	-0.44
CSRP2	ENST00000311083.5	cysteine and glycine-rich protein 2	hsa-miR-199a-3p	Downregulated	-0.44
SNN	ENST00000329565.5	stannin	hsa-miR-199a-3p	Downregulated	-0.44
CELF2	ENST00000379261.4	CUGBP, Elav-like family member 2	hsa-miR-199a-3p	Downregulated	-0.44
CNOT7	ENST00000361272.4	CCR4-NOT transcription complex, subunit 7	hsa-miR-199a-3p	Downregulated	-0.44
COG4	ENST00000323786.5	component of oligomeric golgi complex 4	hsa-miR-142-3p.1	Downregulated	-0.44
GSTK1	ENST00000358406.5	glutathione S-transferase kappa 1	hsa-miR-124-3p.1	Upregulated	-0.44
ACADVL	ENST00000356839.5	acyl-CoA dehydrogenase, very long chain	hsa-miR-124-3p.1	Upregulated	-0.44
ZNF449	ENST00000339249.4	zinc finger protein 449	hsa-miR-124-3p.1	Upregulated	-0.44
RAB11FIP1	ENST00000287263.4	RAB11 family interacting protein 1 (class I)	hsa-miR-124-3p.1	Upregulated	-0.44
PNPLA2	ENST00000336615.4	patatin-like phospholipase domain containing 2	hsa-miR-124-3p.1	Upregulated	-0.44
G3BP1	ENST00000394123.3	GTPase activating protein (SH3 domain) binding protein 1	hsa-miR-124-3p.1	Upregulated	-0.44
MAN2A1	ENST00000261483.4	mannosidase, alpha, class 2A, member 1	hsa-miR-124-3p.1	Upregulated	-0.44
DMRTA1	ENST00000325870.2	DMRT-like family A1	hsa-miR-124-3p.1	Upregulated	-0.44
PGF	ENST00000555567.1	placental growth factor	hsa-miR-124-3p.1	Upregulated	-0.44
SGK1	ENST00000367858.5	serum/glucocorticoid regulated kinase 1	hsa-miR-124-3p.1	Upregulated	-0.44
APH1B	ENST00000261879.5	APH1B gamma secretase subunit	hsa-miR-124-3p.1	Upregulated	-0.44
PIK3IP1	ENST00000441972.1	phosphoinositide-3-kinase interacting protein 1	hsa-miR-129-1-3p	Upregulated	-0.44
RGS17	ENST00000367225.2	regulator of G-protein signaling 17	hsa-miR-129-1-3p	Upregulated	-0.44
EGLN3	ENST00000250457.3	egl-9 family hypoxia-inducible factor 3	hsa-miR-129-1-3p	Upregulated	-0.44
HSPH1	ENST00000320027.5	heat shock 105kDa/110kDa protein 1	hsa-miR-129-1-3p	Upregulated	-0.44
MMP16	ENST00000286614.6	matrix metallopeptidase 16 (membrane-inserted)	hsa-miR-129-2-3p	Upregulated	-0.44
KIAA0226L	ENST00000378781.3	KIAA0226-like	hsa-miR-129-2-3p	Upregulated	-0.44
ENPEP	ENST00000265162.5	glutamyl aminopeptidase (aminopeptidase A)	hsa-miR-9-5p	Upregulated	-0.44
SMARCD2	ENST00000448276.2	SWI/SNF related, matrix associated, actin dependent regulator of chromatin, subfamily d, member 2	hsa-miR-9-5p	Upregulated	-0.44
RHOA	ENST00000454011.2	ras homolog family member A	hsa-miR-9-5p	Upregulated	-0.44
EMB	ENST00000303221.5	embigin	hsa-miR-9-5p	Upregulated	-0.44
ARMCX2	ENST00000330154.2	armadillo repeat containing, X-linked 2	hsa-miR-9-5p	Upregulated	-0.44
MYOCD	ENST00000425538.1	myocardin	hsa-miR-9-5p	Upregulated	-0.44
UBE3C	ENST00000348165.5	ubiquitin protein ligase E3C	hsa-miR-9-5p	Upregulated	-0.44
EGR3	ENST00000519492.1	early growth response 3	hsa-miR-219a-5p	Upregulated	-0.44
MFNG	ENST00000416983.3	MFNG O-fucosylpeptide 3-beta-N-acetylglucosaminyltransferase	hsa-miR-219a-5p	Upregulated	-0.44
COL9A1	ENST00000357250.6	collagen, type IX, alpha 1	hsa-miR-219a-5p	Upregulated	-0.44
SIX3	ENST00000260653.3	SIX homeobox 3	hsa-miR-219a-5p	Upregulated	-0.44
GPRC5A	ENST00000014914.5	G protein-coupled receptor, family C, group 5, member A	hsa-miR-199a-5p	Downregulated	-0.43
HSPA5	ENST00000324460.6	heat shock 70kDa protein 5 (glucose-regulated protein, 78kDa)	hsa-miR-199a-5p	Downregulated	-0.43
CACNB2	ENST00000396576.2	calcium channel, voltage-dependent, beta 2 subunit	hsa-miR-199a-5p	Downregulated	-0.43
PPP1R9A	ENST00000289495.5	protein phosphatase 1, regulatory subunit 9A	hsa-miR-199a-5p	Downregulated	-0.43
CBLB	ENST00000264122.4	Cbl proto-oncogene B, E3 ubiquitin protein ligase	hsa-miR-199a-3p	Downregulated	-0.43
LCOR	ENST00000371103.3	ligand dependent nuclear receptor corepressor	hsa-miR-199a-3p	Downregulated	-0.43
CNIH2	ENST00000528852.1	cornichon family AMPA receptor auxiliary protein 2	hsa-miR-199a-3p	Downregulated	-0.43
CHRM3	ENST00000255380.4	cholinergic receptor, muscarinic 3	hsa-miR-199a-3p	Downregulated	-0.43
COPS2	ENST00000388901.5	COP9 signalosome subunit 2	hsa-miR-199a-3p	Downregulated	-0.43
DPF3	ENST00000541685.1	D4, zinc and double PHD fingers, family 3	hsa-miR-199a-3p	Downregulated	-0.43
RORB	ENST00000376896.3	RAR-related orphan receptor B	hsa-miR-199a-3p	Downregulated	-0.43
S1PR3	ENST00000358157.2	sphingosine-1-phosphate receptor 3	hsa-miR-142-3p.1	Downregulated	-0.43
FAM127A	ENST00000257013.7	family with sequence similarity 127, member A	hsa-miR-142-3p.1	Downregulated	-0.43
RGL2	ENST00000497454.1	ral guanine nucleotide dissociation stimulator-like 2	hsa-miR-142-3p.1	Downregulated	-0.43
RAB2A	ENST00000262646.7	RAB2A, member RAS oncogene family	hsa-miR-142-3p.1	Downregulated	-0.43
ANKRD11	ENST00000378330.2	ankyrin repeat domain 11	hsa-miR-142-3p.1	Downregulated	-0.43
STRN3	ENST00000355683.5	striatin, calmodulin binding protein 3	hsa-miR-142-3p.1	Downregulated	-0.43
TFG	ENST00000240851.4	TRK-fused gene	hsa-miR-142-3p.1	Downregulated	-0.43
ZCCHC14	ENST00000268616.4	zinc finger, CCHC domain containing 14	hsa-miR-142-3p.1	Downregulated	-0.43
SLC35F5	ENST00000245680.2	solute carrier family 35, member F5	hsa-miR-124-3p.1	Upregulated	-0.43
LHX9	ENST00000367390.3	LIM homeobox 9	hsa-miR-124-3p.1	Upregulated	-0.43
CTDSPL	ENST00000443503.2	CTD (carboxy-terminal domain, RNA polymerase II, polypeptide A) small phosphatase-like	hsa-miR-124-3p.1	Upregulated	-0.43
ZKSCAN4	ENST00000377294.2	zinc finger with KRAB and SCAN domains 4	hsa-miR-124-3p.1	Upregulated	-0.43
GATA6	ENST00000269216.3	GATA binding protein 6	hsa-miR-124-3p.1	Upregulated	-0.43
NECAP2	ENST00000337132.5	NECAP endocytosis associated 2	hsa-miR-124-3p.1	Upregulated	-0.43
PRRX1	ENST00000367760.3	paired related homeobox 1	hsa-miR-124-3p.1	Upregulated	-0.43
SNX18	ENST00000343017.6	sorting nexin 18	hsa-miR-124-3p.1	Upregulated	-0.43
PLEKHF2	ENST00000315367.3	pleckstrin homology domain containing, family F (with FYVE domain) member 2	hsa-miR-124-3p.1	Upregulated	-0.43
SLC17A5	ENST00000355773.5	solute carrier family 17 (acidic sugar transporter), member 5	hsa-miR-124-3p.1	Upregulated	-0.43
CERS2	ENST00000368954.5	ceramide synthase 2	hsa-miR-124-3p.1	Upregulated	-0.43
MARVELD1	ENST00000285605.6	MARVEL domain containing 1	hsa-miR-124-3p.1	Upregulated	-0.43
SHC1	ENST00000368445.5	SHC (Src homology 2 domain containing) transforming protein 1	hsa-miR-124-3p.1	Upregulated	-0.43
CASQ2	ENST00000261448.5	calsequestrin 2 (cardiac muscle)	hsa-miR-124-3p.1	Upregulated	-0.43
RNF128	ENST00000324342.3	ring finger protein 128, E3 ubiquitin protein ligase	hsa-miR-124-3p.1	Upregulated	-0.43
PRKCE	ENST00000306156.3	protein kinase C, epsilon	hsa-miR-129-1-3p	Upregulated	-0.43
KLHL20	ENST00000209884.4	kelch-like family member 20	hsa-miR-129-1-3p	Upregulated	-0.43
FOXP2	ENST00000408937.3	forkhead box P2	hsa-miR-9-5p	Upregulated	-0.43
FYTTD1	ENST00000241502.4	forty-two-three domain containing 1	hsa-miR-9-5p	Upregulated	-0.43
YPEL2	ENST00000312655.4	yippee-like 2 (Drosophila)	hsa-miR-9-5p	Upregulated	-0.43
MTMR2	ENST00000346299.5	myotubularin related protein 2	hsa-miR-9-5p	Upregulated	-0.43
SHC2	ENST00000264554.6	SHC (Src homology 2 domain containing) transforming protein 2	hsa-miR-9-5p	Upregulated	-0.43
PIRT	ENST00000580256.2	phosphoinositide-interacting regulator of transient receptor potential channels	hsa-miR-9-5p	Upregulated	-0.43
FOXP4	ENST00000373063.3	forkhead box P4	hsa-miR-9-5p	Upregulated	-0.43
MYH1	ENST00000226207.5	myosin, heavy chain 1, skeletal muscle, adult	hsa-miR-9-5p	Upregulated	-0.43
TRIM71	ENST00000383763.5	tripartite motif containing 71, E3 ubiquitin protein ligase	hsa-miR-9-5p	Upregulated	-0.43
CMTR2	ENST00000338099.5	cap methyltransferase 2	hsa-miR-9-5p	Upregulated	-0.43
AP3B1	ENST00000255194.6	adaptor-related protein complex 3, beta 1 subunit	hsa-miR-9-5p	Upregulated	-0.43
UBASH3B	ENST00000284273.5	ubiquitin associated and SH3 domain containing B	hsa-miR-219a-5p	Upregulated	-0.43
ZNF697	ENST00000421812.2	zinc finger protein 697	hsa-miR-219a-5p	Upregulated	-0.43
SPPL2A	ENST00000261854.5	signal peptide peptidase like 2A	hsa-miR-219a-5p	Upregulated	-0.43
PARM1	ENST00000513238.1	prostate androgen-regulated mucin-like protein 1	hsa-miR-219a-5p	Upregulated	-0.43
MYEF2	ENST00000324324.7	myelin expression factor 2	hsa-miR-199a-5p	Downregulated	-0.42
CCDC120	ENST00000376396.3	coiled-coil domain containing 120	hsa-miR-199a-5p	Downregulated	-0.42
FZD4	ENST00000531380.1	frizzled family receptor 4	hsa-miR-199a-5p	Downregulated	-0.42
SRRM1	ENST00000323848.9	serine/arginine repetitive matrix 1	hsa-miR-199b-5p	Downregulated	-0.42
PNRC1	ENST00000336032.3	proline-rich nuclear receptor coactivator 1	hsa-miR-199a-3p	Downregulated	-0.42
SOWAHC	ENST00000356454.3	sosondowah ankyrin repeat domain family member C	hsa-miR-199a-3p	Downregulated	-0.42
SEC16B	ENST00000308284.6	SEC16 homolog B (S. cerevisiae)	hsa-miR-199a-3p	Downregulated	-0.42
CREBZF	ENST00000398294.2	CREB/ATF bZIP transcription factor	hsa-miR-199a-3p	Downregulated	-0.42
COL4A5	ENST00000361603.2	collagen, type IV, alpha 5	hsa-miR-199a-3p	Downregulated	-0.42
KLF13	ENST00000307145.3	Kruppel-like factor 13	hsa-miR-199a-3p	Downregulated	-0.42
LRRC1	ENST00000370888.1	leucine rich repeat containing 1	hsa-miR-142-3p.1	Downregulated	-0.42
ARL15	ENST00000502271.1	ADP-ribosylation factor-like 15	hsa-miR-142-3p.1	Downregulated	-0.42
GNB2	ENST00000303210.4	guanine nucleotide binding protein (G protein), beta polypeptide 2	hsa-miR-142-3p.1	Downregulated	-0.42
LRRC57	ENST00000397130.3	leucine rich repeat containing 57	hsa-miR-124-3p.1	Upregulated	-0.42
C2orf88	ENST00000340623.4	chromosome 2 open reading frame 88	hsa-miR-124-3p.1	Upregulated	-0.42
SOX8	ENST00000293894.3	SRY (sex determining region Y)-box 8	hsa-miR-124-3p.1	Upregulated	-0.42
FAM127A	ENST00000257013.7	family with sequence similarity 127, member A	hsa-miR-124-3p.1	Upregulated	-0.42
RRAS	ENST00000246792.3	related RAS viral (r-ras) oncogene homolog	hsa-miR-124-3p.1	Upregulated	-0.42
KIF13B	ENST00000524189.1	kinesin family member 13B	hsa-miR-124-3p.1	Upregulated	-0.42
CCDC86	ENST00000227520.5	coiled-coil domain containing 86	hsa-miR-124-3p.1	Upregulated	-0.42
PIM3	ENST00000360612.4	pim-3 oncogene	hsa-miR-124-3p.1	Upregulated	-0.42
CRYBG3	ENST00000389622.2	beta-gamma crystallin domain containing 3	hsa-miR-124-3p.1	Upregulated	-0.42
VSTM4	ENST00000332853.4	V-set and transmembrane domain containing 4	hsa-miR-124-3p.1	Upregulated	-0.42
SPPL2A	ENST00000261854.5	signal peptide peptidase like 2A	hsa-miR-124-3p.1	Upregulated	-0.42
RYK	ENST00000296084.4	receptor-like tyrosine kinase	hsa-miR-124-3p.1	Upregulated	-0.42
FAM133A	ENST00000538690.1	family with sequence similarity 133, member A	hsa-miR-124-3p.1	Upregulated	-0.42
DUSP15	ENST00000486996.1	dual specificity phosphatase 15	hsa-miR-124-3p.1	Upregulated	-0.42
SH3PXD2A	ENST00000369774.4	SH3 and PX domains 2A	hsa-miR-124-3p.1	Upregulated	-0.42
USP13	ENST00000263966.3	ubiquitin specific peptidase 13 (isopeptidase T-3)	hsa-miR-129-2-3p	Upregulated	-0.42
ZNF225	ENST00000592780.1	zinc finger protein 225	hsa-miR-129-1-3p	Upregulated	-0.42
SBK1	ENST00000341901.4	SH3 domain binding kinase 1	hsa-miR-129-1-3p	Upregulated	-0.42
CASC4	ENST00000360824.3	cancer susceptibility candidate 4	hsa-miR-129-1-3p	Upregulated	-0.42
SOX4	ENST00000244745.1	SRY (sex determining region Y)-box 4	hsa-miR-129-1-3p	Upregulated	-0.42
RCHY1	ENST00000451788.1	ring finger and CHY zinc finger domain containing 1, E3 ubiquitin protein ligase	hsa-miR-129-1-3p	Upregulated	-0.42
DGKI	ENST00000453654.2	diacylglycerol kinase, iota	hsa-miR-129-1-3p	Upregulated	-0.42
DOK6	ENST00000382713.5	docking protein 6	hsa-miR-9-5p	Upregulated	-0.42
RHOQ	ENST00000238738.4	ras homolog family member Q	hsa-miR-9-5p	Upregulated	-0.42
C21orf91	ENST00000400558.3	chromosome 21 open reading frame 91	hsa-miR-9-5p	Upregulated	-0.42
HN1L	ENST00000248098.3	hematological and neurological expressed 1-like	hsa-miR-9-5p	Upregulated	-0.42
ANO1	ENST00000355303.5	anoctamin 1, calcium activated chloride channel	hsa-miR-9-5p	Upregulated	-0.42
CCDC43	ENST00000457422.2	coiled-coil domain containing 43	hsa-miR-9-5p	Upregulated	-0.42
FAM19A5	ENST00000358295.5	family with sequence similarity 19 (chemokine (C-C motif)-like), member A5	hsa-miR-9-5p	Upregulated	-0.42
KCNMB2	ENST00000432997.1	potassium large conductance calcium-activated channel, subfamily M, beta member 2	hsa-miR-9-5p	Upregulated	-0.42
PRDM1	ENST00000369089.3	PR domain containing 1, with ZNF domain	hsa-miR-9-5p	Upregulated	-0.42
SLC35B3	ENST00000379660.4	solute carrier family 35 (adenosine 3'-phospho 5'-phosphosulfate transporter), member B3	hsa-miR-9-5p	Upregulated	-0.42
SPATS2	ENST00000553127.1	spermatogenesis associated, serine-rich 2	hsa-miR-219a-2-3p	Upregulated	-0.42
INPP5J	ENST00000331075.5	inositol polyphosphate-5-phosphatase J	hsa-miR-219a-5p	Upregulated	-0.42
CACNB3	ENST00000301050.2	calcium channel, voltage-dependent, beta 3 subunit	hsa-miR-219a-5p	Upregulated	-0.42
ROR1	ENST00000371079.1	receptor tyrosine kinase-like orphan receptor 1	hsa-miR-219a-5p	Upregulated	-0.42
RAB35	ENST00000534951.1	RAB35, member RAS oncogene family	hsa-miR-219a-5p	Upregulated	-0.42
PPARGC1A	ENST00000264867.2	peroxisome proliferator-activated receptor gamma, coactivator 1 alpha	hsa-miR-199a-5p	Downregulated	-0.41
CLTC	ENST00000269122.3	clathrin, heavy chain (Hc)	hsa-miR-199a-5p	Downregulated	-0.41
CDKN2AIP	ENST00000302350.4	CDKN2A interacting protein	hsa-miR-199a-5p	Downregulated	-0.41
CSGALNACT1	ENST00000454498.2	chondroitin sulfate N-acetylgalactosaminyltransferase 1	hsa-miR-199a-5p	Downregulated	-0.41
EVX2	ENST00000308618.4	even-skipped homeobox 2	hsa-miR-199a-5p	Downregulated	-0.41
WNT2	ENST00000265441.3	wingless-type MMTV integration site family member 2	hsa-miR-199b-5p	Downregulated	-0.41
MICAL3	ENST00000441493.2	microtubule associated monooxygenase, calponin and LIM domain containing 3	hsa-miR-199a-5p	Downregulated	-0.41
BAAT	ENST00000259407.2	bile acid CoA: amino acid N-acyltransferase (glycine N-choloyltransferase)	hsa-miR-199a-5p	Downregulated	-0.41
IL23R	ENST00000371002.1	interleukin 23 receptor	hsa-miR-199a-5p	Downregulated	-0.41
KDM6A	ENST00000377967.4	lysine (K)-specific demethylase 6A	hsa-miR-199a-3p	Downregulated	-0.41
SDC2	ENST00000302190.4	syndecan 2	hsa-miR-199a-3p	Downregulated	-0.41
PPP2R2A	ENST00000380737.3	protein phosphatase 2, regulatory subunit B, alpha	hsa-miR-199a-3p	Downregulated	-0.41
PLEKHA3	ENST00000234453.5	pleckstrin homology domain containing, family A (phosphoinositide binding specific) member 3	hsa-miR-199a-3p	Downregulated	-0.41
CCNJ	ENST00000265992.5	cyclin J	hsa-miR-142-3p.1	Downregulated	-0.41
MRFAP1	ENST00000382581.4	Morf4 family associated protein 1	hsa-miR-142-3p.1	Downregulated	-0.41
HEATR5A	ENST00000389961.3	HEAT repeat containing 5A	hsa-miR-142-3p.1	Downregulated	-0.41
FAM127B	ENST00000370775.2	family with sequence similarity 127, member B	hsa-miR-142-3p.1	Downregulated	-0.41
PATZ1	ENST00000405309.3	POZ (BTB) and AT hook containing zinc finger 1	hsa-miR-142-3p.1	Downregulated	-0.41
FNTB	ENST00000246166.2	farnesyltransferase, CAAX box, beta	hsa-miR-142-3p.1	Downregulated	-0.41
PDE4B	ENST00000371045.5	phosphodiesterase 4B, cAMP-specific	hsa-miR-142-3p.1	Downregulated	-0.41
MCUR1	ENST00000379170.4	mitochondrial calcium uniporter regulator 1	hsa-miR-124-3p.1	Upregulated	-0.41
DLX5	ENST00000222598.4	distal-less homeobox 5	hsa-miR-124-3p.1	Upregulated	-0.41
SEPT10	ENST00000397712.2	septin 10	hsa-miR-124-3p.1	Upregulated	-0.41
SERTAD4	ENST00000367012.3	SERTA domain containing 4	hsa-miR-124-3p.1	Upregulated	-0.41
MXD1	ENST00000264444.2	MAX dimerization protein 1	hsa-miR-124-3p.1	Upregulated	-0.41
DDX6	ENST00000264018.4	DEAD (Asp-Glu-Ala-Asp) box helicase 6	hsa-miR-124-3p.1	Upregulated	-0.41
NFIB	ENST00000397575.3	nuclear factor I/B	hsa-miR-124-3p.1	Upregulated	-0.41
C3orf58	ENST00000441925.2	chromosome 3 open reading frame 58	hsa-miR-124-3p.1	Upregulated	-0.41
ACAA2	ENST00000285093.10	acetyl-CoA acyltransferase 2	hsa-miR-124-3p.1	Upregulated	-0.41
SORD	ENST00000267814.9	sorbitol dehydrogenase	hsa-miR-124-3p.1	Upregulated	-0.41
CCDC130	ENST00000586600.1	coiled-coil domain containing 130	hsa-miR-124-3p.1	Upregulated	-0.41
F11R	ENST00000368026.6	F11 receptor	hsa-miR-124-3p.1	Upregulated	-0.41
USP2	ENST00000455332.2	ubiquitin specific peptidase 2	hsa-miR-124-3p.1	Upregulated	-0.41
FLOT1	ENST00000376389.3	flotillin 1	hsa-miR-124-3p.1	Upregulated	-0.41
FAR1	ENST00000354817.3	fatty acyl CoA reductase 1	hsa-miR-124-3p.1	Upregulated	-0.41
ITGB3	ENST00000559488.1	integrin, beta 3 (platelet glycoprotein IIIa, antigen CD61)	hsa-miR-124-3p.1	Upregulated	-0.41
CHSY1	ENST00000254190.3	chondroitin sulfate synthase 1	hsa-miR-124-3p.1	Upregulated	-0.41
CSPP1	ENST00000262210.5	centrosome and spindle pole associated protein 1	hsa-miR-124-3p.1	Upregulated	-0.41
USP45	ENST00000392738.2	ubiquitin specific peptidase 45	hsa-miR-124-3p.1	Upregulated	-0.41
PAQR9	ENST00000340634.3	progestin and adipoQ receptor family member IX	hsa-miR-124-3p.1	Upregulated	-0.41
MANBAL	ENST00000397150.1	mannosidase, beta A, lysosomal-like	hsa-miR-124-3p.1	Upregulated	-0.41
ZBTB34	ENST00000319119.4	zinc finger and BTB domain containing 34	hsa-miR-129-1-3p	Upregulated	-0.41
PTAR1	ENST00000377200.5	protein prenyltransferase alpha subunit repeat containing 1	hsa-miR-129-1-3p	Upregulated	-0.41
MPZL1	ENST00000474859.1	myelin protein zero-like 1	hsa-miR-129-1-3p	Upregulated	-0.41
TRIB1	ENST00000311922.3	tribbles pseudokinase 1	hsa-miR-129-1-3p	Upregulated	-0.41
PI4K2A	ENST00000370649.3	Phosphatidylinositol 4-kinase type 2-alpha; Uncharacterized protein	hsa-miR-9-5p	Upregulated	-0.41
DENND2C	ENST00000393276.3	DENN/MADD domain containing 2C	hsa-miR-9-5p	Upregulated	-0.41
LURAP1L	ENST00000319264.3	leucine rich adaptor protein 1-like	hsa-miR-9-5p	Upregulated	-0.41
SLC6A2	ENST00000219833.8	solute carrier family 6 (neurotransmitter transporter), member 2	hsa-miR-9-5p	Upregulated	-0.41
EIF4E3	ENST00000425534.3	eukaryotic translation initiation factor 4E family member 3	hsa-miR-9-5p	Upregulated	-0.41
TOMM20	ENST00000366607.4	translocase of outer mitochondrial membrane 20 homolog (yeast)	hsa-miR-9-5p	Upregulated	-0.41
DLX3	ENST00000434704.2	distal-less homeobox 3	hsa-miR-9-5p	Upregulated	-0.41
GABRP	ENST00000519385.1	gamma-aminobutyric acid (GABA) A receptor, pi	hsa-miR-219a-2-3p	Upregulated	-0.41
RECK	ENST00000377966.3	reversion-inducing-cysteine-rich protein with kazal motifs	hsa-miR-219a-5p	Upregulated	-0.41
DNAJC6	ENST00000395325.3	DnaJ (Hsp40) homolog, subfamily C, member 6	hsa-miR-219a-5p	Upregulated	-0.41
GRIP1	ENST00000398016.3	glutamate receptor interacting protein 1	hsa-miR-199a-5p	Downregulated	-0.4
IPO8	ENST00000256079.4	importin 8	hsa-miR-199b-5p	Downregulated	-0.4
ABCC1	ENST00000399408.2	ATP-binding cassette, sub-family C (CFTR/MRP), member 1	hsa-miR-199a-5p	Downregulated	-0.4
SACS	ENST00000402364.1	spastic ataxia of Charlevoix-Saguenay (sacsin)	hsa-miR-199a-5p	Downregulated	-0.4
JUNB	ENST00000302754.4	jun B proto-oncogene	hsa-miR-199b-5p	Downregulated	-0.4
ETS1	ENST00000531611.1	v-ets avian erythroblastosis virus E26 oncogene homolog 1	hsa-miR-199a-5p	Downregulated	-0.4
MUC21	ENST00000376296.3	mucin 21, cell surface associated	hsa-miR-199a-5p	Downregulated	-0.4
SLC39A10	ENST00000409086.3	solute carrier family 39 (zinc transporter), member 10	hsa-miR-199a-3p	Downregulated	-0.4
GNPTAB	ENST00000299314.7	N-acetylglucosamine-1-phosphate transferase, alpha and beta subunits	hsa-miR-199a-3p	Downregulated	-0.4
NID2	ENST00000216286.5	nidogen 2 (osteonidogen)	hsa-miR-199a-3p	Downregulated	-0.4
PRKCE	ENST00000306156.3	protein kinase C, epsilon	hsa-miR-199a-3p	Downregulated	-0.4
ESRP1	ENST00000358397.5	epithelial splicing regulatory protein 1	hsa-miR-199a-3p	Downregulated	-0.4
MBD6	ENST00000355673.3	methyl-CpG binding domain protein 6	hsa-miR-150-5p	Downregulated	-0.4
LMO3	ENST00000354662.1	LIM domain only 3 (rhombotin-like 2)	hsa-miR-142-3p.1	Downregulated	-0.4
FAM73A	ENST00000370791.3	family with sequence similarity 73, member A	hsa-miR-142-3p.1	Downregulated	-0.4
KIF5B	ENST00000302418.4	kinesin family member 5B	hsa-miR-142-3p.1	Downregulated	-0.4
LRRC32	ENST00000260061.5	leucine rich repeat containing 32	hsa-miR-142-3p.1	Downregulated	-0.4
PAFAH1B2	ENST00000527958.1	platelet-activating factor acetylhydrolase 1b, catalytic subunit 2 (30kDa)	hsa-miR-142-3p.1	Downregulated	-0.4
LITAF	ENST00000413364.2	lipopolysaccharide-induced TNF factor	hsa-miR-124-3p.1	Upregulated	-0.4
APBA3	ENST00000316757.3	amyloid beta (A4) precursor protein-binding, family A, member 3	hsa-miR-124-3p.1	Upregulated	-0.4
SUMF1	ENST00000272902.5	sulfatase modifying factor 1	hsa-miR-124-3p.1	Upregulated	-0.4
RSRC2	ENST00000331738.7	arginine/serine-rich coiled-coil 2	hsa-miR-124-3p.1	Upregulated	-0.4
CTNS	ENST00000046640.3	cystinosin, lysosomal cystine transporter	hsa-miR-124-3p.1	Upregulated	-0.4
CRTC3	ENST00000420329.2	CREB regulated transcription coactivator 3	hsa-miR-124-3p.1	Upregulated	-0.4
SLC7A2	ENST00000494857.1	solute carrier family 7 (cationic amino acid transporter, y+ system), member 2	hsa-miR-124-3p.1	Upregulated	-0.4
HECTD2	ENST00000371667.1	HECT domain containing E3 ubiquitin protein ligase 2	hsa-miR-124-3p.1	Upregulated	-0.4
SRSF6	ENST00000244020.3	serine/arginine-rich splicing factor 6	hsa-miR-124-3p.1	Upregulated	-0.4
GPAM	ENST00000348367.4	glycerol-3-phosphate acyltransferase, mitochondrial	hsa-miR-124-3p.1	Upregulated	-0.4
PRPS1	ENST00000372435.4	phosphoribosyl pyrophosphate synthetase 1	hsa-miR-124-3p.1	Upregulated	-0.4
PAQR8	ENST00000442253.2	progestin and adipoQ receptor family member VIII	hsa-miR-124-3p.1	Upregulated	-0.4
AMMECR1	ENST00000262844.5	Alport syndrome, mental retardation, midface hypoplasia and elliptocytosis chromosomal region gene 1	hsa-miR-124-3p.1	Upregulated	-0.4
SNTA1	ENST00000217381.2	syntrophin, alpha 1	hsa-miR-124-3p.1	Upregulated	-0.4
TEAD1	ENST00000361905.4	TEA domain family member 1 (SV40 transcriptional enhancer factor)	hsa-miR-124-3p.1	Upregulated	-0.4
GNG2	ENST00000556752.1	guanine nucleotide binding protein (G protein), gamma 2	hsa-miR-124-3p.1	Upregulated	-0.4
GMCL1	ENST00000282570.3	germ cell-less, spermatogenesis associated 1	hsa-miR-124-3p.1	Upregulated	-0.4
COL4A1	ENST00000375820.4	collagen, type IV, alpha 1	hsa-miR-124-3p.1	Upregulated	-0.4
SLC31A1	ENST00000374212.4	solute carrier family 31 (copper transporter), member 1	hsa-miR-124-3p.1	Upregulated	-0.4
IMPACT	ENST00000284202.4	impact RWD domain protein	hsa-miR-124-3p.1	Upregulated	-0.4
RAB38	ENST00000243662.6	RAB38, member RAS oncogene family	hsa-miR-124-3p.1	Upregulated	-0.4
C9orf72	ENST00000380003.3	chromosome 9 open reading frame 72	hsa-miR-124-3p.1	Upregulated	-0.4
MYRF	ENST00000278836.5	myelin regulatory factor	hsa-miR-124-3p.1	Upregulated	-0.4
OGFOD3	ENST00000329197.5	2-oxoglutarate and iron-dependent oxygenase domain containing 3	hsa-miR-124-3p.1	Upregulated	-0.4
SMCO4	ENST00000525141.1	single-pass membrane protein with coiled-coil domains 4	hsa-miR-124-3p.1	Upregulated	-0.4
ATP1A1	ENST00000295598.5	ATPase, Na+/K+ transporting, alpha 1 polypeptide	hsa-miR-124-3p.1	Upregulated	-0.4
FRYL	ENST00000503238.1	FRY-like	hsa-miR-129-1-3p	Upregulated	-0.4
SYT9	ENST00000318881.6	synaptotagmin IX	hsa-miR-129-1-3p	Upregulated	-0.4
SEC23IP	ENST00000369075.3	SEC23 interacting protein	hsa-miR-9-5p	Upregulated	-0.4
NTNG1	ENST00000370067.1	netrin G1	hsa-miR-9-5p	Upregulated	-0.4
SNX7	ENST00000306121.3	sorting nexin 7	hsa-miR-9-5p	Upregulated	-0.4
PRRX1	ENST00000367760.3	paired related homeobox 1	hsa-miR-9-5p	Upregulated	-0.4
WASF2	ENST00000536657.1	WAS protein family, member 2	hsa-miR-9-5p	Upregulated	-0.4
ANP32B	ENST00000339399.4	acidic (leucine-rich) nuclear phosphoprotein 32 family, member B	hsa-miR-9-5p	Upregulated	-0.4
NR5A2	ENST00000367362.3	nuclear receptor subfamily 5, group A, member 2	hsa-miR-9-5p	Upregulated	-0.4
GPR137C	ENST00000321662.6	G protein-coupled receptor 137C	hsa-miR-9-5p	Upregulated	-0.4
ITGB4	ENST00000200181.3	integrin, beta 4	hsa-miR-9-5p	Upregulated	-0.4
HNRNPK	ENST00000376281.4	heterogeneous nuclear ribonucleoprotein K	hsa-miR-219a-2-3p	Upregulated	-0.4
SEPHS1	ENST00000545675.1	selenophosphate synthetase 1	hsa-miR-219a-2-3p	Upregulated	-0.4
FBXO30	ENST00000237281.4	F-box protein 30	hsa-miR-219a-5p	Upregulated	-0.4
PAX3	ENST00000350526.4	paired box 3	hsa-miR-199a-5p	Downregulated	-0.39
CYLC2	ENST00000374798.3	cylicin, basic protein of sperm head cytoskeleton 2	hsa-miR-199a-5p	Downregulated	-0.39
ACHE	ENST00000302913.4	acetylcholinesterase	hsa-miR-199a-5p	Downregulated	-0.39
ZNF594	ENST00000399604.4	zinc finger protein 594	hsa-miR-199a-5p	Downregulated	-0.39
SORCS3	ENST00000369701.3	sortilin-related VPS10 domain containing receptor 3	hsa-miR-199a-5p	Downregulated	-0.39
TMEM106B	ENST00000396667.3	transmembrane protein 106B	hsa-miR-199a-3p	Downregulated	-0.39
GAN	ENST00000568107.2	gigaxonin	hsa-miR-199a-3p	Downregulated	-0.39
TMEM62	ENST00000260403.2	transmembrane protein 62	hsa-miR-199a-3p	Downregulated	-0.39
RABGAP1	ENST00000373647.4	RAB GTPase activating protein 1	hsa-miR-199a-3p	Downregulated	-0.39
CPEB4	ENST00000265085.5	cytoplasmic polyadenylation element binding protein 4	hsa-miR-199a-3p	Downregulated	-0.39
C1orf21	ENST00000235307.6	chromosome 1 open reading frame 21	hsa-miR-199a-3p	Downregulated	-0.39
ACVR2A	ENST00000241416.7	activin A receptor, type IIA	hsa-miR-199a-3p	Downregulated	-0.39
SLC38A4	ENST00000447411.1	solute carrier family 38, member 4	hsa-miR-142-3p.1	Downregulated	-0.39
VAMP3	ENST00000054666.6	vesicle-associated membrane protein 3	hsa-miR-142-3p.1	Downregulated	-0.39
CLOCK	ENST00000309964.4	clock circadian regulator	hsa-miR-142-3p.1	Downregulated	-0.39
CD84	ENST00000534968.1	CD84 molecule	hsa-miR-142-3p.1	Downregulated	-0.39
TGFBR1	ENST00000374994.4	transforming growth factor, beta receptor 1	hsa-miR-142-3p.1	Downregulated	-0.39
GPR137C	ENST00000321662.6	G protein-coupled receptor 137C	hsa-miR-142-3p.1	Downregulated	-0.39
SUCO	ENST00000367723.4	SUN domain containing ossification factor	hsa-miR-142-3p.1	Downregulated	-0.39
ATF7IP	ENST00000261168.4	activating transcription factor 7 interacting protein	hsa-miR-142-3p.1	Downregulated	-0.39
NIPA1	ENST00000337435.4	non imprinted in Prader-Willi/Angelman syndrome 1	hsa-miR-124-3p.1	Upregulated	-0.39
TRMT10A	ENST00000394877.3	tRNA methyltransferase 10 homolog A (S. cerevisiae)	hsa-miR-124-3p.1	Upregulated	-0.39
PQLC3	ENST00000402361.1	PQ loop repeat containing 3	hsa-miR-124-3p.1	Upregulated	-0.39
GCDH	ENST00000222214.5	glutaryl-CoA dehydrogenase	hsa-miR-124-3p.1	Upregulated	-0.39
PSEN1	ENST00000344094.3	presenilin 1	hsa-miR-124-3p.1	Upregulated	-0.39
NID1	ENST00000366595.3	nidogen 1	hsa-miR-124-3p.1	Upregulated	-0.39
MID1IP1	ENST00000336949.6	MID1 interacting protein 1	hsa-miR-124-3p.1	Upregulated	-0.39
ZCCHC24	ENST00000372336.3	zinc finger, CCHC domain containing 24	hsa-miR-124-3p.1	Upregulated	-0.39
TYSND1	ENST00000335494.5	trypsin domain containing 1	hsa-miR-124-3p.1	Upregulated	-0.39
EYA2	ENST00000327619.5	eyes absent homolog 2 (Drosophila)	hsa-miR-124-3p.1	Upregulated	-0.39
ELOVL5	ENST00000370918.4	ELOVL fatty acid elongase 5	hsa-miR-124-3p.1	Upregulated	-0.39
RAB11FIP5	ENST00000258098.6	RAB11 family interacting protein 5 (class I)	hsa-miR-124-3p.1	Upregulated	-0.39
SPRY3	ENST00000302805.2	sprouty homolog 3 (Drosophila)	hsa-miR-124-3p.1	Upregulated	-0.39
DENND6A	ENST00000311128.5	DENN/MADD domain containing 6A	hsa-miR-124-3p.1	Upregulated	-0.39
PUS3	ENST00000227474.3	pseudouridylate synthase 3	hsa-miR-124-3p.1	Upregulated	-0.39
LMF2	ENST00000380796.3	lipase maturation factor 2	hsa-miR-124-3p.1	Upregulated	-0.39
SLC15A4	ENST00000266771.5	solute carrier family 15 (oligopeptide transporter), member 4	hsa-miR-124-3p.1	Upregulated	-0.39
KIAA1958	ENST00000337530.6	KIAA1958	hsa-miR-124-3p.1	Upregulated	-0.39
GNPTAB	ENST00000299314.7	N-acetylglucosamine-1-phosphate transferase, alpha and beta subunits	hsa-miR-129-1-3p	Upregulated	-0.39
KLHL28	ENST00000396128.4	kelch-like family member 28	hsa-miR-129-1-3p	Upregulated	-0.39
FAM124A	ENST00000322475.8	family with sequence similarity 124A	hsa-miR-129-1-3p	Upregulated	-0.39
NPTN	ENST00000345330.4	neuroplastin	hsa-miR-129-1-3p	Upregulated	-0.39
AGPAT4	ENST00000366911.5	1-acylglycerol-3-phosphate O-acyltransferase 4	hsa-miR-129-1-3p	Upregulated	-0.39
KLHL9	ENST00000359039.4	kelch-like family member 9	hsa-miR-129-1-3p	Upregulated	-0.39
GPR137C	ENST00000321662.6	G protein-coupled receptor 137C	hsa-miR-129-1-3p	Upregulated	-0.39
CDC42EP3	ENST00000295324.3	CDC42 effector protein (Rho GTPase binding) 3	hsa-miR-129-1-3p	Upregulated	-0.39
NUS1	ENST00000368494.3	nuclear undecaprenyl pyrophosphate synthase 1 homolog (S. cerevisiae)	hsa-miR-9-5p	Upregulated	-0.39
CPEB2	ENST00000538197.1	cytoplasmic polyadenylation element binding protein 2	hsa-miR-9-5p	Upregulated	-0.39
ARID3B	ENST00000346246.5	AT rich interactive domain 3B (BRIGHT-like)	hsa-miR-9-5p	Upregulated	-0.39
GDNF	ENST00000326524.2	glial cell derived neurotrophic factor	hsa-miR-9-5p	Upregulated	-0.39
TMEM109	ENST00000227525.3	transmembrane protein 109	hsa-miR-9-5p	Upregulated	-0.39
TMX4	ENST00000246024.2	thioredoxin-related transmembrane protein 4	hsa-miR-219a-5p	Upregulated	-0.39
MECOM	ENST00000460814.1	MDS1 and EVI1 complex locus	hsa-miR-219a-5p	Upregulated	-0.39
HGF	ENST00000222390.5	hepatocyte growth factor (hepapoietin A; scatter factor)	hsa-miR-199a-5p	Downregulated	-0.38
TMEM63B	ENST00000259746.9	transmembrane protein 63B	hsa-miR-199a-5p	Downregulated	-0.38
MARCH7	ENST00000259050.4	membrane-associated ring finger (C3HC4) 7, E3 ubiquitin protein ligase	hsa-miR-199a-5p	Downregulated	-0.38
OSR1	ENST00000272223.2	odd-skipped related 1 (Drosophila)	hsa-miR-199a-5p	Downregulated	-0.38
FOXQ1	ENST00000296839.2	forkhead box Q1	hsa-miR-199a-3p	Downregulated	-0.38
STRIP2	ENST00000249344.2	striatin interacting protein 2	hsa-miR-199a-3p	Downregulated	-0.38
RB1	ENST00000267163.4	retinoblastoma 1	hsa-miR-199a-3p	Downregulated	-0.38
CCDC85C	ENST00000380243.4	coiled-coil domain containing 85C	hsa-miR-199a-3p	Downregulated	-0.38
GCNT2	ENST00000316170.3	glucosaminyl (N-acetyl) transferase 2, I-branching enzyme (I blood group)	hsa-miR-199a-3p	Downregulated	-0.38
ALX4	ENST00000329255.3	ALX homeobox 4	hsa-miR-199a-3p	Downregulated	-0.38
TSPAN3	ENST00000267970.4	tetraspanin 3	hsa-miR-199a-3p	Downregulated	-0.38
NFIA	ENST00000403491.3	nuclear factor I/A	hsa-miR-199a-3p	Downregulated	-0.38
BASP1	ENST00000322611.3	brain abundant, membrane attached signal protein 1	hsa-miR-150-5p	Downregulated	-0.38
SKP1	ENST00000353411.6	S-phase kinase-associated protein 1	hsa-miR-150-5p	Downregulated	-0.38
CCNT1	ENST00000261900.3	cyclin T1	hsa-miR-150-5p	Downregulated	-0.38
ZBTB4	ENST00000380599.4	zinc finger and BTB domain containing 4	hsa-miR-150-5p	Downregulated	-0.38
CTTN	ENST00000346329.3	cortactin	hsa-miR-142-3p.1	Downregulated	-0.38
MTCH1	ENST00000373616.5	mitochondrial carrier 1	hsa-miR-142-3p.1	Downregulated	-0.38
CASK	ENST00000421587.2	calcium/calmodulin-dependent serine protein kinase (MAGUK family)	hsa-miR-142-3p.1	Downregulated	-0.38
UTRN	ENST00000367545.3	utrophin	hsa-miR-142-3p.1	Downregulated	-0.38
CASC3	ENST00000264645.7	cancer susceptibility candidate 3	hsa-miR-124-3p.1	Upregulated	-0.38
TMEM257	ENST00000408967.2	transmembrane protein 257	hsa-miR-124-3p.1	Upregulated	-0.38
CLEC1A	ENST00000315330.4	C-type lectin domain family 1, member A	hsa-miR-124-3p.1	Upregulated	-0.38
ABHD5	ENST00000458276.2	abhydrolase domain containing 5	hsa-miR-124-3p.1	Upregulated	-0.38
BARX2	ENST00000281437.4	BARX homeobox 2	hsa-miR-124-3p.1	Upregulated	-0.38
ALDH9A1	ENST00000354775.4	aldehyde dehydrogenase 9 family, member A1	hsa-miR-124-3p.1	Upregulated	-0.38
CTXN1	ENST00000318978.4	cortexin 1	hsa-miR-124-3p.1	Upregulated	-0.38
ATMIN	ENST00000299575.4	ATM interactor	hsa-miR-124-3p.1	Upregulated	-0.38
NR4A1	ENST00000394824.2	nuclear receptor subfamily 4, group A, member 1	hsa-miR-124-3p.1	Upregulated	-0.38
CDH2	ENST00000269141.3	cadherin 2, type 1, N-cadherin (neuronal)	hsa-miR-124-3p.1	Upregulated	-0.38
HTATIP2	ENST00000451739.2	HIV-1 Tat interactive protein 2, 30kDa	hsa-miR-124-3p.1	Upregulated	-0.38
GCH1	ENST00000491895.2	GTP cyclohydrolase 1	hsa-miR-124-3p.1	Upregulated	-0.38
ZFP36L1	ENST00000555997.1	ZFP36 ring finger protein-like 1	hsa-miR-124-3p.1	Upregulated	-0.38
CHIC2	ENST00000263921.3	cysteine-rich hydrophobic domain 2	hsa-miR-124-3p.1	Upregulated	-0.38
ARFIP1	ENST00000451320.2	ADP-ribosylation factor interacting protein 1	hsa-miR-124-3p.1	Upregulated	-0.38
DHCR24	ENST00000371269.3	24-dehydrocholesterol reductase	hsa-miR-124-3p.1	Upregulated	-0.38
AKT1S1	ENST00000391833.1	AKT1 substrate 1 (proline-rich)	hsa-miR-124-3p.1	Upregulated	-0.38
C2orf69	ENST00000319974.5	chromosome 2 open reading frame 69	hsa-miR-124-3p.1	Upregulated	-0.38
RNF125	ENST00000217740.3	ring finger protein 125, E3 ubiquitin protein ligase	hsa-miR-124-3p.1	Upregulated	-0.38
KCNA6	ENST00000433855.1	potassium voltage-gated channel, shaker-related subfamily, member 6	hsa-miR-124-3p.1	Upregulated	-0.38
SGMS1	ENST00000361781.2	sphingomyelin synthase 1	hsa-miR-124-3p.1	Upregulated	-0.38
RHBDF1	ENST00000262316.6	rhomboid 5 homolog 1 (Drosophila)	hsa-miR-124-3p.1	Upregulated	-0.38
SAMD12	ENST00000409003.4	sterile alpha motif domain containing 12	hsa-miR-124-3p.1	Upregulated	-0.38
CMPK1	ENST00000371873.5	cytidine monophosphate (UMP-CMP) kinase 1, cytosolic	hsa-miR-124-3p.1	Upregulated	-0.38
HADHA	ENST00000380649.3	hydroxyacyl-CoA dehydrogenase/3-ketoacyl-CoA thiolase/enoyl-CoA hydratase (trifunctional protein), alpha subunit	hsa-miR-124-3p.1	Upregulated	-0.38
SLITRK4	ENST00000381779.4	SLIT and NTRK-like family, member 4	hsa-miR-124-3p.1	Upregulated	-0.38
CAV1	ENST00000405348.1	caveolin 1, caveolae protein, 22kDa	hsa-miR-124-3p.1	Upregulated	-0.38
STT3B	ENST00000295770.2	STT3B, subunit of the oligosaccharyltransferase complex (catalytic)	hsa-miR-129-1-3p	Upregulated	-0.38
RAP2A	ENST00000245304.4	RAP2A, member of RAS oncogene family	hsa-miR-129-1-3p	Upregulated	-0.38
NAV3	ENST00000228327.6	neuron navigator 3	hsa-miR-129-2-3p	Upregulated	-0.38
BORA	ENST00000390667.5	bora, aurora kinase A activator	hsa-miR-129-1-3p	Upregulated	-0.38
DYNLL2	ENST00000579991.2	dynein, light chain, LC8-type 2	hsa-miR-129-2-3p	Upregulated	-0.38
GABRG1	ENST00000295452.4	gamma-aminobutyric acid (GABA) A receptor, gamma 1	hsa-miR-129-2-3p	Upregulated	-0.38
C4orf46	ENST00000508457.1	chromosome 4 open reading frame 46	hsa-miR-9-5p	Upregulated	-0.38
TBPL1	ENST00000237264.4	TBP-like 1	hsa-miR-9-5p	Upregulated	-0.38
ACOT7	ENST00000608083.1	acyl-CoA thioesterase 7	hsa-miR-9-5p	Upregulated	-0.38
TAL2	ENST00000334077.3	T-cell acute lymphocytic leukemia 2	hsa-miR-9-5p	Upregulated	-0.38
SUDS3	ENST00000397564.2	suppressor of defective silencing 3 homolog (S. cerevisiae)	hsa-miR-9-5p	Upregulated	-0.38
HIST1H2AI	ENST00000358739.3	histone cluster 1, H2ai	hsa-miR-9-5p	Upregulated	-0.38
CCAR2	ENST00000308511.4	cell cycle and apoptosis regulator 2	hsa-miR-9-5p	Upregulated	-0.38
VWA7	ENST00000375686.3	von Willebrand factor A domain containing 7	hsa-miR-9-5p	Upregulated	-0.38
PLBD1	ENST00000240617.5	phospholipase B domain containing 1	hsa-miR-9-5p	Upregulated	-0.38
GCH1	ENST00000491895.2	GTP cyclohydrolase 1	hsa-miR-9-5p	Upregulated	-0.38
GOT1	ENST00000370508.5	glutamic-oxaloacetic transaminase 1, soluble	hsa-miR-9-5p	Upregulated	-0.38
DACT3	ENST00000300875.4	dishevelled-binding antagonist of beta-catenin 3	hsa-miR-9-5p	Upregulated	-0.38
CCDC138	ENST00000412964.2	coiled-coil domain containing 138	hsa-miR-9-5p	Upregulated	-0.38
SERAC1	ENST00000367102.2	serine active site containing 1	hsa-miR-219a-2-3p	Upregulated	-0.38
HES5	ENST00000378453.3	hairy and enhancer of split 5 (Drosophila)	hsa-miR-219a-5p	Upregulated	-0.38
SLC41A1	ENST00000367137.3	solute carrier family 41 (magnesium transporter), member 1	hsa-miR-219a-5p	Upregulated	-0.38
NCOA1	ENST00000405141.1	nuclear receptor coactivator 1	hsa-miR-219a-5p	Upregulated	-0.38
KBTBD8	ENST00000295568.4	kelch repeat and BTB (POZ) domain containing 8	hsa-miR-219a-5p	Upregulated	-0.38
RNF11	ENST00000242719.3	ring finger protein 11	hsa-miR-199a-5p	Downregulated	-0.37
ZNF516	ENST00000443185.2	zinc finger protein 516	hsa-miR-199a-5p	Downregulated	-0.37
FPGS	ENST00000373245.1	folylpolyglutamate synthase	hsa-miR-199a-5p	Downregulated	-0.37
SAT1	ENST00000379270.4	spermidine/spermine N1-acetyltransferase 1	hsa-miR-199a-5p	Downregulated	-0.37
LARGE	ENST00000354992.2	like-glycosyltransferase	hsa-miR-199b-5p	Downregulated	-0.37
KATNBL1	ENST00000256544.3	katanin p80 subunit B-like 1	hsa-miR-199a-3p	Downregulated	-0.37
SLC24A2	ENST00000341998.2	solute carrier family 24 (sodium/potassium/calcium exchanger), member 2	hsa-miR-199a-3p	Downregulated	-0.37
TAB2	ENST00000367456.1	TGF-beta activated kinase 1/MAP3K7 binding protein 2	hsa-miR-199a-3p	Downregulated	-0.37
CHAD	ENST00000258969.4	chondroadherin	hsa-miR-199a-3p	Downregulated	-0.37
GHR	ENST00000230882.4	growth hormone receptor	hsa-miR-142-3p.1	Downregulated	-0.37
TMED7	ENST00000456936.3	transmembrane emp24 protein transport domain containing 7	hsa-miR-142-3p.1	Downregulated	-0.37
RFWD3	ENST00000361070.4	ring finger and WD repeat domain 3	hsa-miR-142-3p.1	Downregulated	-0.37
KDM6A	ENST00000377967.4	lysine (K)-specific demethylase 6A	hsa-miR-142-3p.1	Downregulated	-0.37
KAT2B	ENST00000263754.4	K(lysine) acetyltransferase 2B	hsa-miR-142-3p.1	Downregulated	-0.37
BNC2	ENST00000380672.4	basonuclin 2	hsa-miR-142-3p.1	Downregulated	-0.37
RARG	ENST00000425354.2	retinoic acid receptor, gamma	hsa-miR-142-3p.1	Downregulated	-0.37
C5orf28	ENST00000500337.2	chromosome 5 open reading frame 28	hsa-miR-124-3p.1	Upregulated	-0.37
SYT14	ENST00000399639.2	synaptotagmin XIV	hsa-miR-124-3p.1	Upregulated	-0.37
TSEN54	ENST00000333213.6	TSEN54 tRNA splicing endonuclease subunit	hsa-miR-124-3p.1	Upregulated	-0.37
P4HA1	ENST00000307116.2	prolyl 4-hydroxylase, alpha polypeptide I	hsa-miR-124-3p.1	Upregulated	-0.37
CDC42EP3	ENST00000295324.3	CDC42 effector protein (Rho GTPase binding) 3	hsa-miR-124-3p.1	Upregulated	-0.37
LMO4	ENST00000370544.5	LIM domain only 4	hsa-miR-124-3p.1	Upregulated	-0.37
TNFSF11	ENST00000405262.2	tumor necrosis factor (ligand) superfamily, member 11	hsa-miR-124-3p.1	Upregulated	-0.37
NR3C1	ENST00000394464.2	nuclear receptor subfamily 3, group C, member 1 (glucocorticoid receptor)	hsa-miR-124-3p.1	Upregulated	-0.37
ANKRD27	ENST00000306065.4	ankyrin repeat domain 27 (VPS9 domain)	hsa-miR-124-3p.1	Upregulated	-0.37
E2F5	ENST00000418930.2	E2F transcription factor 5, p130-binding	hsa-miR-124-3p.1	Upregulated	-0.37
LCLAT1	ENST00000309052.4	lysocardiolipin acyltransferase 1	hsa-miR-124-3p.1	Upregulated	-0.37
AHR	ENST00000242057.4	aryl hydrocarbon receptor	hsa-miR-124-3p.1	Upregulated	-0.37
ZMPSTE24	ENST00000372759.3	zinc metallopeptidase STE24	hsa-miR-124-3p.1	Upregulated	-0.37
FAM76B	ENST00000358780.5	family with sequence similarity 76, member B	hsa-miR-124-3p.1	Upregulated	-0.37
SLC44A5	ENST00000370859.3	solute carrier family 44, member 5	hsa-miR-124-3p.1	Upregulated	-0.37
DCAF16	ENST00000382247.1	DDB1 and CUL4 associated factor 16	hsa-miR-124-3p.1	Upregulated	-0.37
XPO4	ENST00000400602.2	exportin 4	hsa-miR-124-3p.1	Upregulated	-0.37
PPIF	ENST00000394579.3	peptidylprolyl isomerase F	hsa-miR-124-3p.1	Upregulated	-0.37
TYK2	ENST00000524462.1	tyrosine kinase 2	hsa-miR-124-3p.1	Upregulated	-0.37
TMEM87B	ENST00000283206.4	transmembrane protein 87B	hsa-miR-124-3p.1	Upregulated	-0.37
EPT1	ENST00000260585.7	ethanolaminephosphotransferase 1 (CDP-ethanolamine-specific)	hsa-miR-124-3p.1	Upregulated	-0.37
AC012215.1	ENST00000437887.1	Uncharacterized protein	hsa-miR-124-3p.1	Upregulated	-0.37
SALL4	ENST00000217086.4	sal-like 4 (Drosophila)	hsa-miR-124-3p.1	Upregulated	-0.37
HPS4	ENST00000398145.2	Hermansky-Pudlak syndrome 4	hsa-miR-129-1-3p	Upregulated	-0.37
PERP	ENST00000421351.3	PERP, TP53 apoptosis effector	hsa-miR-129-1-3p	Upregulated	-0.37
DOK4	ENST00000566936.1	docking protein 4	hsa-miR-129-1-3p	Upregulated	-0.37
TCF7	ENST00000518915.1	transcription factor 7 (T-cell specific, HMG-box)	hsa-miR-129-1-3p	Upregulated	-0.37
OSBPL10	ENST00000396556.2	oxysterol binding protein-like 10	hsa-miR-129-1-3p	Upregulated	-0.37
YES1	ENST00000577961.1	v-yes-1 Yamaguchi sarcoma viral oncogene homolog 1	hsa-miR-129-1-3p	Upregulated	-0.37
NMNAT2	ENST00000294868.4	nicotinamide nucleotide adenylyltransferase 2	hsa-miR-129-1-3p	Upregulated	-0.37
SIRT1	ENST00000212015.6	sirtuin 1	hsa-miR-9-5p	Upregulated	-0.37
MAP3K2	ENST00000409947.1	mitogen-activated protein kinase kinase kinase 2	hsa-miR-9-5p	Upregulated	-0.37
OGDHL	ENST00000374103.4	oxoglutarate dehydrogenase-like	hsa-miR-9-5p	Upregulated	-0.37
GRHL1	ENST00000405379.2	grainyhead-like 1 (Drosophila)	hsa-miR-9-5p	Upregulated	-0.37
RASSF3	ENST00000542104.1	Ras association (RalGDS/AF-6) domain family member 3	hsa-miR-9-5p	Upregulated	-0.37
DIXDC1	ENST00000440460.2	DIX domain containing 1	hsa-miR-9-5p	Upregulated	-0.37
C1QL1	ENST00000253407.3	complement component 1, q subcomponent-like 1	hsa-miR-9-5p	Upregulated	-0.37
ALCAM	ENST00000306107.5	activated leukocyte cell adhesion molecule	hsa-miR-9-5p	Upregulated	-0.37
DOK6	ENST00000382713.5	docking protein 6	hsa-miR-219a-2-3p	Upregulated	-0.37
EYA2	ENST00000327619.5	eyes absent homolog 2 (Drosophila)	hsa-miR-219a-5p	Upregulated	-0.37
CD2AP	ENST00000359314.5	CD2-associated protein	hsa-miR-219a-5p	Upregulated	-0.37
FBXO3	ENST00000526785.1	F-box protein 3	hsa-miR-219a-5p	Upregulated	-0.37
MMS19	ENST00000327277.7	MMS19 nucleotide excision repair homolog (S. cerevisiae)	hsa-miR-219a-5p	Upregulated	-0.37
GLTSCR1L	ENST00000314073.5	GLTSCR1-like	hsa-miR-219a-5p	Upregulated	-0.37
DDAH1	ENST00000535924.2	dimethylarginine dimethylaminohydrolase 1	hsa-miR-219a-5p	Upregulated	-0.37
SLC35F5	ENST00000245680.2	solute carrier family 35, member F5	hsa-miR-219a-5p	Upregulated	-0.37
INSIG1	ENST00000342407.5	insulin induced gene 1	hsa-miR-219a-5p	Upregulated	-0.37
NPAS2	ENST00000335681.5	neuronal PAS domain protein 2	hsa-miR-199a-5p	Downregulated	-0.36
ZCCHC4	ENST00000302874.4	zinc finger, CCHC domain containing 4	hsa-miR-199a-5p	Downregulated	-0.36
PKN2	ENST00000370521.3	protein kinase N2	hsa-miR-199a-5p	Downregulated	-0.36
KPNA4	ENST00000334256.4	karyopherin alpha 4 (importin alpha 3)	hsa-miR-199a-5p	Downregulated	-0.36
DRAM1	ENST00000258534.8	DNA-damage regulated autophagy modulator 1	hsa-miR-199a-5p	Downregulated	-0.36
SLC9A8	ENST00000361573.2	solute carrier family 9, subfamily A (NHE8, cation proton antiporter 8), member 8	hsa-miR-199a-5p	Downregulated	-0.36
HSPA12A	ENST00000369209.3	heat shock 70kDa protein 12A	hsa-miR-199b-5p	Downregulated	-0.36
SEMA3A	ENST00000265362.4	sema domain, immunoglobulin domain (Ig), short basic domain, secreted, (semaphorin) 3A	hsa-miR-199a-3p	Downregulated	-0.36
APLP2	ENST00000263574.5	amyloid beta (A4) precursor-like protein 2	hsa-miR-199a-3p	Downregulated	-0.36
YAP1	ENST00000282441.5	Yes-associated protein 1	hsa-miR-199a-3p	Downregulated	-0.36
CNPPD1	ENST00000360507.5	cyclin Pas1/PHO80 domain containing 1	hsa-miR-150-5p	Downregulated	-0.36
HMGA1	ENST00000347617.6	high mobility group AT-hook 1	hsa-miR-142-3p.1	Downregulated	-0.36
USP6NL	ENST00000609104.1	USP6 N-terminal like	hsa-miR-142-3p.1	Downregulated	-0.36
LRRC59	ENST00000225972.7	leucine rich repeat containing 59	hsa-miR-142-3p.1	Downregulated	-0.36
TIPARP	ENST00000295924.7	TCDD-inducible poly(ADP-ribose) polymerase	hsa-miR-142-3p.1	Downregulated	-0.36
TBL1X	ENST00000407597.2	transducin (beta)-like 1X-linked	hsa-miR-142-3p.1	Downregulated	-0.36
NAP1L1	ENST00000261182.8	nucleosome assembly protein 1-like 1	hsa-miR-124-3p.1	Upregulated	-0.36
KIAA1024	ENST00000305428.3	KIAA1024	hsa-miR-124-3p.1	Upregulated	-0.36
ST3GAL1	ENST00000319914.5	ST3 beta-galactoside alpha-2,3-sialyltransferase 1	hsa-miR-124-3p.1	Upregulated	-0.36
PLEKHH1	ENST00000329153.5	pleckstrin homology domain containing, family H (with MyTH4 domain) member 1	hsa-miR-124-3p.1	Upregulated	-0.36
STK36	ENST00000295709.3	serine/threonine kinase 36	hsa-miR-124-3p.1	Upregulated	-0.36
SLC25A39	ENST00000225308.8	solute carrier family 25, member 39	hsa-miR-124-3p.1	Upregulated	-0.36
WIPF2	ENST00000323571.4	WAS/WASL interacting protein family, member 2	hsa-miR-124-3p.1	Upregulated	-0.36
KLF4	ENST00000374672.4	Kruppel-like factor 4 (gut)	hsa-miR-124-3p.1	Upregulated	-0.36
C11orf84	ENST00000294244.4	chromosome 11 open reading frame 84	hsa-miR-124-3p.1	Upregulated	-0.36
OSBPL10	ENST00000396556.2	oxysterol binding protein-like 10	hsa-miR-124-3p.1	Upregulated	-0.36
RDH10	ENST00000240285.5	retinol dehydrogenase 10 (all-trans)	hsa-miR-124-3p.1	Upregulated	-0.36
ZNF219	ENST00000360947.3	zinc finger protein 219	hsa-miR-124-3p.1	Upregulated	-0.36
CHST14	ENST00000306243.5	carbohydrate (N-acetylgalactosamine 4-0) sulfotransferase 14	hsa-miR-124-3p.1	Upregulated	-0.36
GRB2	ENST00000392563.1	growth factor receptor-bound protein 2	hsa-miR-124-3p.1	Upregulated	-0.36
RAVER1	ENST00000293677.6	ribonucleoprotein, PTB-binding 1	hsa-miR-124-3p.1	Upregulated	-0.36
EGR2	ENST00000242480.3	early growth response 2	hsa-miR-124-3p.1	Upregulated	-0.36
FXR1	ENST00000357559.4	fragile X mental retardation, autosomal homolog 1	hsa-miR-124-3p.1	Upregulated	-0.36
PAPSS2	ENST00000361175.4	3'-phosphoadenosine 5'-phosphosulfate synthase 2	hsa-miR-124-3p.1	Upregulated	-0.36
PALLD	ENST00000261509.6	palladin, cytoskeletal associated protein	hsa-miR-124-3p.1	Upregulated	-0.36
PHF6	ENST00000332070.3	PHD finger protein 6	hsa-miR-124-3p.1	Upregulated	-0.36
SLC35F3	ENST00000366618.3	solute carrier family 35, member F3	hsa-miR-124-3p.1	Upregulated	-0.36
C9orf41	ENST00000376834.3	chromosome 9 open reading frame 41	hsa-miR-124-3p.1	Upregulated	-0.36
TRIB3	ENST00000217233.3	tribbles pseudokinase 3	hsa-miR-124-3p.1	Upregulated	-0.36
BCL7A	ENST00000538010.1	B-cell CLL/lymphoma 7A	hsa-miR-124-3p.1	Upregulated	-0.36
TPD52L2	ENST00000346249.4	tumor protein D52-like 2	hsa-miR-124-3p.1	Upregulated	-0.36
ORC2	ENST00000234296.2	origin recognition complex, subunit 2	hsa-miR-124-3p.1	Upregulated	-0.36
TTC26	ENST00000430935.1	tetratricopeptide repeat domain 26	hsa-miR-124-3p.1	Upregulated	-0.36
CAPN6	ENST00000324068.1	calpain 6	hsa-miR-124-3p.1	Upregulated	-0.36
TRAF6	ENST00000526995.1	TNF receptor-associated factor 6, E3 ubiquitin protein ligase	hsa-miR-124-3p.1	Upregulated	-0.36
HOMER2	ENST00000450735.2	homer homolog 2 (Drosophila)	hsa-miR-129-1-3p	Upregulated	-0.36
SMAD3	ENST00000327367.4	SMAD family member 3	hsa-miR-129-2-3p	Upregulated	-0.36
GPR75	ENST00000394705.2	G protein-coupled receptor 75	hsa-miR-129-1-3p	Upregulated	-0.36
ROBO1	ENST00000436010.2	roundabout, axon guidance receptor, homolog 1 (Drosophila)	hsa-miR-129-1-3p	Upregulated	-0.36
H3F3B	ENST00000591890.1	H3 histone, family 3B (H3.3B)	hsa-miR-129-1-3p	Upregulated	-0.36
SNX6	ENST00000396526.3	sorting nexin 6	hsa-miR-129-1-3p	Upregulated	-0.36
MUM1L1	ENST00000357175.2	melanoma associated antigen (mutated) 1-like 1	hsa-miR-9-5p	Upregulated	-0.36
CREG2	ENST00000324768.5	cellular repressor of E1A-stimulated genes 2	hsa-miR-9-5p	Upregulated	-0.36
OPN3	ENST00000366554.2	opsin 3	hsa-miR-9-5p	Upregulated	-0.36
SPECC1L	ENST00000314328.9	sperm antigen with calponin homology and coiled-coil domains 1-like	hsa-miR-9-5p	Upregulated	-0.36
VRTN	ENST00000256362.4	vertebrae development associated	hsa-miR-9-5p	Upregulated	-0.36
ALAD	ENST00000409155.3	aminolevulinate dehydratase	hsa-miR-9-5p	Upregulated	-0.36
M6PR	ENST00000000412.3	mannose-6-phosphate receptor (cation dependent)	hsa-miR-9-5p	Upregulated	-0.36
IGFBP3	ENST00000381086.5	insulin-like growth factor binding protein 3	hsa-miR-9-5p	Upregulated	-0.36
PTAR1	ENST00000377200.5	protein prenyltransferase alpha subunit repeat containing 1	hsa-miR-9-5p	Upregulated	-0.36
NUDCD1	ENST00000239690.4	NudC domain containing 1	hsa-miR-219a-2-3p	Upregulated	-0.36
PPP1R14B	ENST00000392210.2	protein phosphatase 1, regulatory (inhibitor) subunit 14B	hsa-miR-219a-5p	Upregulated	-0.36
THRA	ENST00000450525.2	thyroid hormone receptor, alpha	hsa-miR-219a-5p	Upregulated	-0.36
CACUL1	ENST00000369151.3	CDK2-associated, cullin domain 1	hsa-miR-219a-5p	Upregulated	-0.36
NOL4	ENST00000261592.5	nucleolar protein 4	hsa-miR-219a-5p	Upregulated	-0.36
SDK1	ENST00000404826.2	sidekick cell adhesion molecule 1	hsa-miR-219a-5p	Upregulated	-0.36
ERG	ENST00000398905.1	v-ets avian erythroblastosis virus E26 oncogene homolog	hsa-miR-219a-5p	Upregulated	-0.36
EFNB2	ENST00000245323.4	ephrin-B2	hsa-miR-219a-5p	Upregulated	-0.36
RBM23	ENST00000555209.1	RNA binding motif protein 23	hsa-miR-199a-5p	Downregulated	-0.35
CAPRIN1	ENST00000341394.4	cell cycle associated protein 1	hsa-miR-199a-5p	Downregulated	-0.35
FAM178A	ENST00000238961.4	family with sequence similarity 178, member A	hsa-miR-199a-5p	Downregulated	-0.35
RLIM	ENST00000332687.6	ring finger protein, LIM domain interacting	hsa-miR-199a-5p	Downregulated	-0.35
EXOC8	ENST00000360394.2	exocyst complex component 8	hsa-miR-199a-5p	Downregulated	-0.35
NAB2	ENST00000357680.4	NGFI-A binding protein 2 (EGR1 binding protein 2)	hsa-miR-199a-5p	Downregulated	-0.35
LARP4	ENST00000398473.2	La ribonucleoprotein domain family, member 4	hsa-miR-199a-5p	Downregulated	-0.35
TSPAN3	ENST00000267970.4	tetraspanin 3	hsa-miR-199a-5p	Downregulated	-0.35
KIAA1109	ENST00000388738.3	KIAA1109	hsa-miR-199a-5p	Downregulated	-0.35
RANBP2	ENST00000283195.6	RAN binding protein 2	hsa-miR-199a-5p	Downregulated	-0.35
NAALADL2	ENST00000454872.1	N-acetylated alpha-linked acidic dipeptidase-like 2	hsa-miR-199a-5p	Downregulated	-0.35
RAPGEF4	ENST00000409036.1	Rap guanine nucleotide exchange factor (GEF) 4	hsa-miR-199a-3p	Downregulated	-0.35
CXXC5	ENST00000302517.3	CXXC finger protein 5	hsa-miR-199a-3p	Downregulated	-0.35
ACOX1	ENST00000293217.5	acyl-CoA oxidase 1, palmitoyl	hsa-miR-199a-3p	Downregulated	-0.35
SLC20A2	ENST00000342228.3	solute carrier family 20 (phosphate transporter), member 2	hsa-miR-199a-3p	Downregulated	-0.35
NET1	ENST00000355029.4	neuroepithelial cell transforming 1	hsa-miR-199a-3p	Downregulated	-0.35
SRR	ENST00000344595.5	serine racemase	hsa-miR-199a-3p	Downregulated	-0.35
VLDLR	ENST00000382100.3	very low density lipoprotein receptor	hsa-miR-199a-3p	Downregulated	-0.35
PVRL3	ENST00000319792.3	poliovirus receptor-related 3	hsa-miR-199a-3p	Downregulated	-0.35
NEDD4	ENST00000338963.2	neural precursor cell expressed, developmentally down-regulated 4, E3 ubiquitin protein ligase	hsa-miR-199a-3p	Downregulated	-0.35
PTPRZ1	ENST00000393386.2	protein tyrosine phosphatase, receptor-type, Z polypeptide 1	hsa-miR-199a-3p	Downregulated	-0.35
MTOR	ENST00000376838.1	mechanistic target of rapamycin (serine/threonine kinase)	hsa-miR-199a-3p	Downregulated	-0.35
HECTD1	ENST00000553700.1	HECT domain containing E3 ubiquitin protein ligase 1	hsa-miR-142-3p.1	Downregulated	-0.35
PROX1	ENST00000366958.4	prospero homeobox 1	hsa-miR-142-3p.1	Downregulated	-0.35
LPP	ENST00000312675.4	LIM domain containing preferred translocation partner in lipoma	hsa-miR-142-3p.1	Downregulated	-0.35
COPG1	ENST00000314797.6	coatomer protein complex, subunit gamma 1	hsa-miR-142-3p.1	Downregulated	-0.35
C18orf25	ENST00000282059.6	chromosome 18 open reading frame 25	hsa-miR-142-3p.1	Downregulated	-0.35
PUM1	ENST00000424085.2	pumilio RNA-binding family member 1	hsa-miR-142-3p.1	Downregulated	-0.35
PRDM13	ENST00000369215.4	PR domain containing 13	hsa-miR-124-3p.1	Upregulated	-0.35
PTPRZ1	ENST00000393386.2	protein tyrosine phosphatase, receptor-type, Z polypeptide 1	hsa-miR-124-3p.1	Upregulated	-0.35
WDR44	ENST00000254029.3	WD repeat domain 44	hsa-miR-124-3p.1	Upregulated	-0.35
CALCB	ENST00000523376.1	calcitonin-related polypeptide beta	hsa-miR-124-3p.1	Upregulated	-0.35
CAPNS1	ENST00000587718.1	calpain, small subunit 1	hsa-miR-124-3p.1	Upregulated	-0.35
FAM199X	ENST00000493442.1	family with sequence similarity 199, X-linked	hsa-miR-124-3p.1	Upregulated	-0.35
KIF2A	ENST00000381103.2	kinesin heavy chain member 2A	hsa-miR-124-3p.1	Upregulated	-0.35
PRKAG2	ENST00000287878.4	protein kinase, AMP-activated, gamma 2 non-catalytic subunit	hsa-miR-124-3p.1	Upregulated	-0.35
C1orf233	ENST00000422725.1	chromosome 1 open reading frame 233	hsa-miR-124-3p.1	Upregulated	-0.35
GSN	ENST00000373823.3	gelsolin	hsa-miR-124-3p.1	Upregulated	-0.35
ELF3	ENST00000367284.5	E74-like factor 3 (ets domain transcription factor, epithelial-specific )	hsa-miR-124-3p.1	Upregulated	-0.35
ARHGAP32	ENST00000524655.1	Rho GTPase activating protein 32	hsa-miR-124-3p.1	Upregulated	-0.35
NKAP	ENST00000371410.3	NFKB activating protein	hsa-miR-124-3p.1	Upregulated	-0.35
USP1	ENST00000339950.4	ubiquitin specific peptidase 1	hsa-miR-124-3p.1	Upregulated	-0.35
PAM	ENST00000438793.3	peptidylglycine alpha-amidating monooxygenase	hsa-miR-124-3p.1	Upregulated	-0.35
RYR3	ENST00000389232.4	ryanodine receptor 3	hsa-miR-124-3p.1	Upregulated	-0.35
SGCZ	ENST00000382080.1	sarcoglycan, zeta	hsa-miR-124-3p.1	Upregulated	-0.35
LIMD2	ENST00000259006.3	LIM domain containing 2	hsa-miR-124-3p.1	Upregulated	-0.35
NEGR1	ENST00000357731.5	neuronal growth regulator 1	hsa-miR-124-3p.1	Upregulated	-0.35
GLIS2	ENST00000262366.3	GLIS family zinc finger 2	hsa-miR-124-3p.1	Upregulated	-0.35
PDE4B	ENST00000371045.5	phosphodiesterase 4B, cAMP-specific	hsa-miR-124-3p.1	Upregulated	-0.35
CREB3L2	ENST00000330387.6	cAMP responsive element binding protein 3-like 2	hsa-miR-124-3p.1	Upregulated	-0.35
INO80C	ENST00000334598.7	INO80 complex subunit C	hsa-miR-124-3p.1	Upregulated	-0.35
CALU	ENST00000535011.2	calumenin	hsa-miR-124-3p.1	Upregulated	-0.35
FAM171A1	ENST00000378116.4	family with sequence similarity 171, member A1	hsa-miR-124-3p.1	Upregulated	-0.35
PKN2	ENST00000370521.3	protein kinase N2	hsa-miR-124-3p.1	Upregulated	-0.35
CLOCK	ENST00000309964.4	clock circadian regulator	hsa-miR-124-3p.1	Upregulated	-0.35
NRG1	ENST00000341377.5	neuregulin 1	hsa-miR-124-3p.1	Upregulated	-0.35
AIF1L	ENST00000372300.1	allograft inflammatory factor 1-like	hsa-miR-129-1-3p	Upregulated	-0.35
C9orf69	ENST00000561457.1	chromosome 9 open reading frame 69	hsa-miR-129-1-3p	Upregulated	-0.35
PNISR	ENST00000369239.5	PNN-interacting serine/arginine-rich protein	hsa-miR-129-1-3p	Upregulated	-0.35
GPRIN3	ENST00000609438.1	GPRIN family member 3	hsa-miR-129-1-3p	Upregulated	-0.35
SELV	ENST00000335426.4	Selenoprotein V	hsa-miR-129-1-3p	Upregulated	-0.35
SLC16A14	ENST00000295190.4	solute carrier family 16, member 14	hsa-miR-129-1-3p	Upregulated	-0.35
PTGER4	ENST00000302472.3	prostaglandin E receptor 4 (subtype EP4)	hsa-miR-129-1-3p	Upregulated	-0.35
PRPS2	ENST00000380668.5	phosphoribosyl pyrophosphate synthetase 2	hsa-miR-9-5p	Upregulated	-0.35
EHD4	ENST00000220325.4	EH-domain containing 4	hsa-miR-9-5p	Upregulated	-0.35
LRCH4	ENST00000310300.6	leucine-rich repeats and calponin homology (CH) domain containing 4	hsa-miR-9-5p	Upregulated	-0.35
ITM2C	ENST00000326407.6	integral membrane protein 2C	hsa-miR-9-5p	Upregulated	-0.35
ARF6	ENST00000298316.5	ADP-ribosylation factor 6	hsa-miR-9-5p	Upregulated	-0.35
PCNP	ENST00000296024.5	PEST proteolytic signal containing nuclear protein	hsa-miR-9-5p	Upregulated	-0.35
PALMD	ENST00000263174.4	palmdelphin	hsa-miR-9-5p	Upregulated	-0.35
DNAJC14	ENST00000357606.3	DnaJ (Hsp40) homolog, subfamily C, member 14	hsa-miR-9-5p	Upregulated	-0.35
TMEM38A	ENST00000187762.2	transmembrane protein 38A	hsa-miR-9-5p	Upregulated	-0.35
PTGES3L	ENST00000453594.1	prostaglandin E synthase 3 (cytosolic)-like	hsa-miR-9-5p	Upregulated	-0.35
KHDRBS2	ENST00000281156.4	KH domain containing, RNA binding, signal transduction associated 2	hsa-miR-219a-2-3p	Upregulated	-0.35
TBK1	ENST00000331710.5	TANK-binding kinase 1	hsa-miR-219a-2-3p	Upregulated	-0.35
ING1	ENST00000333219.7	inhibitor of growth family, member 1	hsa-miR-219a-2-3p	Upregulated	-0.35
GPAT2	ENST00000377137.3	glycerol-3-phosphate acyltransferase 2, mitochondrial	hsa-miR-219a-5p	Upregulated	-0.35
TGFBR2	ENST00000359013.4	transforming growth factor, beta receptor II (70/80kDa)	hsa-miR-219a-5p	Upregulated	-0.35
RBPMS	ENST00000320203.4	RNA binding protein with multiple splicing	hsa-miR-219a-5p	Upregulated	-0.35
PIGR	ENST00000356495.4	polymeric immunoglobulin receptor	hsa-miR-219a-5p	Upregulated	-0.35
HOXD3	ENST00000249440.3	homeobox D3	hsa-miR-219a-5p	Upregulated	-0.35
PNPLA6	ENST00000221249.6	patatin-like phospholipase domain containing 6	hsa-miR-199a-5p	Downregulated	-0.34
UHMK1	ENST00000538489.1	U2AF homology motif (UHM) kinase 1	hsa-miR-199b-5p	Downregulated	-0.34
RAB27B	ENST00000262094.5	RAB27B, member RAS oncogene family	hsa-miR-199a-5p	Downregulated	-0.34
BTBD3	ENST00000254977.3	BTB (POZ) domain containing 3	hsa-miR-199a-5p	Downregulated	-0.34
TSPAN5	ENST00000305798.3	tetraspanin 5	hsa-miR-199a-5p	Downregulated	-0.34
RHEB	ENST00000262187.5	Ras homolog enriched in brain	hsa-miR-199a-5p	Downregulated	-0.34
CSDC2	ENST00000306149.7	cold shock domain containing C2, RNA binding	hsa-miR-199a-5p	Downregulated	-0.34
ITGA8	ENST00000378076.3	integrin, alpha 8	hsa-miR-199a-5p	Downregulated	-0.34
TBC1D8	ENST00000376840.4	TBC1 domain family, member 8 (with GRAM domain)	hsa-miR-199a-5p	Downregulated	-0.34
PVRL1	ENST00000264025.3	poliovirus receptor-related 1 (herpesvirus entry mediator C)	hsa-miR-199a-5p	Downregulated	-0.34
RTN4RL2	ENST00000335099.3	reticulon 4 receptor-like 2	hsa-miR-199a-5p	Downregulated	-0.34
ZNF286B	ENST00000285274.5	zinc finger protein 286B	hsa-miR-199a-5p	Downregulated	-0.34
UBE2G1	ENST00000396981.2	ubiquitin-conjugating enzyme E2G 1	hsa-miR-199a-5p	Downregulated	-0.34
CCDC88A	ENST00000336838.6	coiled-coil domain containing 88A	hsa-miR-199a-3p	Downregulated	-0.34
LMO3	ENST00000354662.1	LIM domain only 3 (rhombotin-like 2)	hsa-miR-199a-3p	Downregulated	-0.34
FOS	ENST00000303562.4	FBJ murine osteosarcoma viral oncogene homolog	hsa-miR-199a-3p	Downregulated	-0.34
IL13RA1	ENST00000371666.3	interleukin 13 receptor, alpha 1	hsa-miR-199a-3p	Downregulated	-0.34
PDE8A	ENST00000310298.4	phosphodiesterase 8A	hsa-miR-199a-3p	Downregulated	-0.34
LRRC1	ENST00000370888.1	leucine rich repeat containing 1	hsa-miR-199a-3p	Downregulated	-0.34
ERBB4	ENST00000342788.4	v-erb-b2 avian erythroblastic leukemia viral oncogene homolog 4	hsa-miR-199a-3p	Downregulated	-0.34
PPP4R2	ENST00000356692.5	protein phosphatase 4, regulatory subunit 2	hsa-miR-199a-3p	Downregulated	-0.34
ZCCHC17	ENST00000344147.5	zinc finger, CCHC domain containing 17	hsa-miR-150-5p	Downregulated	-0.34
RNF207	ENST00000377948.2	ring finger protein 207	hsa-miR-150-5p	Downregulated	-0.34
ZMAT2	ENST00000274712.3	zinc finger, matrin-type 2	hsa-miR-150-5p	Downregulated	-0.34
PLP2	ENST00000376327.5	proteolipid protein 2 (colonic epithelium-enriched)	hsa-miR-150-5p	Downregulated	-0.34
STAT1	ENST00000540176.1	signal transducer and activator of transcription 1, 91kDa	hsa-miR-150-5p	Downregulated	-0.34
SGK1	ENST00000367858.5	serum/glucocorticoid regulated kinase 1	hsa-miR-142-3p.1	Downregulated	-0.34
SKP1	ENST00000353411.6	S-phase kinase-associated protein 1	hsa-miR-142-3p.1	Downregulated	-0.34
PCGF3	ENST00000362003.5	polycomb group ring finger 3	hsa-miR-142-3p.1	Downregulated	-0.34
IRAK1	ENST00000369980.3	interleukin-1 receptor-associated kinase 1	hsa-miR-142-3p.1	Downregulated	-0.34
PLCB1	ENST00000378641.3	phospholipase C, beta 1 (phosphoinositide-specific)	hsa-miR-142-3p.1	Downregulated	-0.34
ERG	ENST00000398905.1	v-ets avian erythroblastosis virus E26 oncogene homolog	hsa-miR-142-3p.1	Downregulated	-0.34
RPRD1A	ENST00000399022.4	regulation of nuclear pre-mRNA domain containing 1A	hsa-miR-142-3p.1	Downregulated	-0.34
TP53INP2	ENST00000374810.3	tumor protein p53 inducible nuclear protein 2	hsa-miR-142-3p.1	Downregulated	-0.34
DNAJB14	ENST00000442697.2	DnaJ (Hsp40) homolog, subfamily B, member 14	hsa-miR-124-3p.1	Upregulated	-0.34
GALNT9	ENST00000397325.2	UDP-N-acetyl-alpha-D-galactosamine:polypeptide N-acetylgalactosaminyltransferase 9 (GalNAc-T9)	hsa-miR-124-3p.1	Upregulated	-0.34
SOS2	ENST00000216373.5	son of sevenless homolog 2 (Drosophila)	hsa-miR-124-3p.1	Upregulated	-0.34
ZKSCAN3	ENST00000377255.3	zinc finger with KRAB and SCAN domains 3	hsa-miR-124-3p.1	Upregulated	-0.34
PAPOLG	ENST00000238714.3	poly(A) polymerase gamma	hsa-miR-124-3p.1	Upregulated	-0.34
MYH10	ENST00000360416.3	myosin, heavy chain 10, non-muscle	hsa-miR-124-3p.1	Upregulated	-0.34
IRF2BPL	ENST00000238647.3	interferon regulatory factor 2 binding protein-like	hsa-miR-124-3p.1	Upregulated	-0.34
RAD54B	ENST00000297592.5	RAD54 homolog B (S. cerevisiae)	hsa-miR-124-3p.1	Upregulated	-0.34
VCAN	ENST00000265077.3	versican	hsa-miR-124-3p.1	Upregulated	-0.34
DLX2	ENST00000234198.4	distal-less homeobox 2	hsa-miR-124-3p.1	Upregulated	-0.34
CDCP1	ENST00000296129.1	CUB domain containing protein 1	hsa-miR-124-3p.1	Upregulated	-0.34
EGR1	ENST00000239938.4	early growth response 1	hsa-miR-124-3p.1	Upregulated	-0.34
PLXNA3	ENST00000369682.3	plexin A3	hsa-miR-124-3p.1	Upregulated	-0.34
HIPK3	ENST00000303296.4	homeodomain interacting protein kinase 3	hsa-miR-124-3p.1	Upregulated	-0.34
SLC7A14	ENST00000231706.5	solute carrier family 7, member 14	hsa-miR-124-3p.1	Upregulated	-0.34
HIVEP2	ENST00000367604.1	human immunodeficiency virus type I enhancer binding protein 2	hsa-miR-124-3p.1	Upregulated	-0.34
FCHO2	ENST00000430046.2	FCH domain only 2	hsa-miR-124-3p.1	Upregulated	-0.34
ZXDC	ENST00000389709.3	ZXD family zinc finger C	hsa-miR-124-3p.1	Upregulated	-0.34
MSRB1	ENST00000399753.2	methionine sulfoxide reductase B1	hsa-miR-124-3p.1	Upregulated	-0.34
TMEM150A	ENST00000306353.3	transmembrane protein 150A	hsa-miR-124-3p.1	Upregulated	-0.34
RCOR1	ENST00000262241.6	REST corepressor 1	hsa-miR-124-3p.1	Upregulated	-0.34
NSUN2	ENST00000264670.6	NOP2/Sun RNA methyltransferase family, member 2	hsa-miR-124-3p.1	Upregulated	-0.34
RNF144A	ENST00000320892.6	ring finger protein 144A	hsa-miR-124-3p.1	Upregulated	-0.34
FAM150B	ENST00000403610.4	family with sequence similarity 150, member B	hsa-miR-124-3p.1	Upregulated	-0.34
SFT2D3	ENST00000310981.4	SFT2 domain containing 3	hsa-miR-124-3p.1	Upregulated	-0.34
CPNE3	ENST00000198765.4	copine III	hsa-miR-124-3p.1	Upregulated	-0.34
TFRC	ENST00000540528.1	transferrin receptor	hsa-miR-124-3p.1	Upregulated	-0.34
AKAP6	ENST00000557272.1	A kinase (PRKA) anchor protein 6	hsa-miR-124-3p.1	Upregulated	-0.34
SCN4B	ENST00000324727.4	sodium channel, voltage-gated, type IV, beta subunit	hsa-miR-124-3p.1	Upregulated	-0.34
SUCO	ENST00000367723.4	SUN domain containing ossification factor	hsa-miR-124-3p.1	Upregulated	-0.34
ZNF614	ENST00000270649.6	zinc finger protein 614	hsa-miR-124-3p.1	Upregulated	-0.34
MTMR6	ENST00000381801.5	myotubularin related protein 6	hsa-miR-124-3p.1	Upregulated	-0.34
AK2	ENST00000467905.1	adenylate kinase 2	hsa-miR-124-3p.1	Upregulated	-0.34
SMARCC1	ENST00000254480.5	SWI/SNF related, matrix associated, actin dependent regulator of chromatin, subfamily c, member 1	hsa-miR-124-3p.1	Upregulated	-0.34
CYS1	ENST00000381813.4	cystin 1	hsa-miR-124-3p.1	Upregulated	-0.34
LAD1	ENST00000391967.2	ladinin 1	hsa-miR-124-3p.1	Upregulated	-0.34
SLC29A1	ENST00000393844.1	solute carrier family 29 (equilibrative nucleoside transporter), member 1	hsa-miR-124-3p.1	Upregulated	-0.34
HIVEP3	ENST00000372583.1	human immunodeficiency virus type I enhancer binding protein 3	hsa-miR-124-3p.1	Upregulated	-0.34
PARP9	ENST00000477522.2	poly (ADP-ribose) polymerase family, member 9	hsa-miR-124-3p.1	Upregulated	-0.34
SCAMP4	ENST00000316097.8	secretory carrier membrane protein 4	hsa-miR-124-3p.1	Upregulated	-0.34
TRPM7	ENST00000560955.1	transient receptor potential cation channel, subfamily M, member 7	hsa-miR-129-1-3p	Upregulated	-0.34
ARAP2	ENST00000303965.4	ArfGAP with RhoGAP domain, ankyrin repeat and PH domain 2	hsa-miR-129-1-3p	Upregulated	-0.34
BNIP3L	ENST00000380629.2	BCL2/adenovirus E1B 19kDa interacting protein 3-like	hsa-miR-129-1-3p	Upregulated	-0.34
SYNGR2	ENST00000589711.1	synaptogyrin 2	hsa-miR-129-1-3p	Upregulated	-0.34
PHTF2	ENST00000416283.2	putative homeodomain transcription factor 2	hsa-miR-129-1-3p	Upregulated	-0.34
C14orf28	ENST00000325192.3	chromosome 14 open reading frame 28	hsa-miR-129-2-3p	Upregulated	-0.34
ZBTB38	ENST00000514251.1	zinc finger and BTB domain containing 38	hsa-miR-129-1-3p	Upregulated	-0.34
PDGFC	ENST00000502773.1	platelet derived growth factor C	hsa-miR-9-5p	Upregulated	-0.34
ZC3H12A	ENST00000373087.6	zinc finger CCCH-type containing 12A	hsa-miR-9-5p	Upregulated	-0.34
KCTD12	ENST00000377474.2	potassium channel tetramerization domain containing 12	hsa-miR-9-5p	Upregulated	-0.34
PCSK2	ENST00000377899.1	proprotein convertase subtilisin/kexin type 2	hsa-miR-9-5p	Upregulated	-0.34
NAP1L1	ENST00000261182.8	nucleosome assembly protein 1-like 1	hsa-miR-9-5p	Upregulated	-0.34
CDK8	ENST00000536792.1	cyclin-dependent kinase 8	hsa-miR-9-5p	Upregulated	-0.34
ZBTB1	ENST00000394712.2	zinc finger and BTB domain containing 1	hsa-miR-9-5p	Upregulated	-0.34
ZKSCAN1	ENST00000324306.6	zinc finger with KRAB and SCAN domains 1	hsa-miR-9-5p	Upregulated	-0.34
DDHD2	ENST00000397166.2	DDHD domain containing 2	hsa-miR-9-5p	Upregulated	-0.34
COL15A1	ENST00000375001.3	collagen, type XV, alpha 1	hsa-miR-9-5p	Upregulated	-0.34
ONECUT3	ENST00000382349.4	one cut homeobox 3	hsa-miR-9-5p	Upregulated	-0.34
RAB27B	ENST00000262094.5	RAB27B, member RAS oncogene family	hsa-miR-9-5p	Upregulated	-0.34
C7orf25	ENST00000350427.4	chromosome 7 open reading frame 25	hsa-miR-9-5p	Upregulated	-0.34
C1orf177	ENST00000358193.3	chromosome 1 open reading frame 177	hsa-miR-219a-2-3p	Upregulated	-0.34
MIA3	ENST00000344922.5	melanoma inhibitory activity family, member 3	hsa-miR-219a-2-3p	Upregulated	-0.34
ZC3H6	ENST00000343936.4	zinc finger CCCH-type containing 6	hsa-miR-219a-5p	Upregulated	-0.34
NR2C2	ENST00000425241.1	nuclear receptor subfamily 2, group C, member 2	hsa-miR-219a-5p	Upregulated	-0.34
KLF16	ENST00000250916.4	Kruppel-like factor 16	hsa-miR-219a-5p	Upregulated	-0.34
AFAP1L2	ENST00000304129.4	actin filament associated protein 1-like 2	hsa-miR-219a-5p	Upregulated	-0.34
ADD2	ENST00000264436.4	adducin 2 (beta)	hsa-miR-219a-5p	Upregulated	-0.34
CXXC4	ENST00000394767.2	CXXC finger protein 4	hsa-miR-219a-5p	Upregulated	-0.34
SYT5	ENST00000590851.1	synaptotagmin V	hsa-miR-219a-5p	Upregulated	-0.34
LSM10	ENST00000315732.2	LSM10, U7 small nuclear RNA associated	hsa-miR-219a-5p	Upregulated	-0.34
VGLL2	ENST00000352536.3	vestigial like 2 (Drosophila)	hsa-miR-199a-5p	Downregulated	-0.33
FER	ENST00000281092.4	fer (fps/fes related) tyrosine kinase	hsa-miR-199a-5p	Downregulated	-0.33
PXN	ENST00000458477.2	paxillin	hsa-miR-199a-5p	Downregulated	-0.33
RBPMS	ENST00000320203.4	RNA binding protein with multiple splicing	hsa-miR-199a-5p	Downregulated	-0.33
ATXN7L1	ENST00000419735.3	ataxin 7-like 1	hsa-miR-199b-5p	Downregulated	-0.33
UBAP1	ENST00000545103.1	ubiquitin associated protein 1	hsa-miR-199b-5p	Downregulated	-0.33
PAN3	ENST00000282391.5	PAN3 poly(A) specific ribonuclease subunit homolog (S. cerevisiae)	hsa-miR-199a-5p	Downregulated	-0.33
TBC1D14	ENST00000448507.1	TBC1 domain family, member 14	hsa-miR-199b-5p	Downregulated	-0.33
DUSP14	ENST00000394389.4	dual specificity phosphatase 14	hsa-miR-199a-5p	Downregulated	-0.33
MAPRE2	ENST00000436190.2	microtubule-associated protein, RP/EB family, member 2	hsa-miR-199a-5p	Downregulated	-0.33
UBALD2	ENST00000327490.6	UBA-like domain containing 2	hsa-miR-199a-5p	Downregulated	-0.33
CHCHD4	ENST00000295767.5	coiled-coil-helix-coiled-coil-helix domain containing 4	hsa-miR-199a-5p	Downregulated	-0.33
CDKN1B	ENST00000228872.4	cyclin-dependent kinase inhibitor 1B (p27, Kip1)	hsa-miR-199a-5p	Downregulated	-0.33
PPFIBP1	ENST00000318304.8	PTPRF interacting protein, binding protein 1 (liprin beta 1)	hsa-miR-199a-5p	Downregulated	-0.33
EIF5B	ENST00000289371.6	eukaryotic translation initiation factor 5B	hsa-miR-199a-5p	Downregulated	-0.33
DDIT4	ENST00000307365.3	DNA-damage-inducible transcript 4	hsa-miR-199a-3p	Downregulated	-0.33
NACC2	ENST00000371753.1	NACC family member 2, BEN and BTB (POZ) domain containing	hsa-miR-199a-3p	Downregulated	-0.33
PTPN3	ENST00000412145.1	protein tyrosine phosphatase, non-receptor type 3	hsa-miR-199a-3p	Downregulated	-0.33
CTNNA2	ENST00000496558.1	catenin (cadherin-associated protein), alpha 2	hsa-miR-199a-3p	Downregulated	-0.33
KDM3A	ENST00000409556.1	lysine (K)-specific demethylase 3A	hsa-miR-199a-3p	Downregulated	-0.33
LIN28B	ENST00000345080.4	lin-28 homolog B (C. elegans)	hsa-miR-199a-3p	Downregulated	-0.33
MBD6	ENST00000355673.3	methyl-CpG binding domain protein 6	hsa-miR-142-3p.1	Downregulated	-0.33
GFI1	ENST00000370332.1	growth factor independent 1 transcription repressor	hsa-miR-142-3p.1	Downregulated	-0.33
UTY	ENST00000331397.4	ubiquitously transcribed tetratricopeptide repeat containing, Y-linked	hsa-miR-142-3p.1	Downregulated	-0.33
PPP1R10	ENST00000376511.2	protein phosphatase 1, regulatory subunit 10	hsa-miR-142-3p.1	Downregulated	-0.33
PROM1	ENST00000447510.2	prominin 1	hsa-miR-142-3p.1	Downregulated	-0.33
EHF	ENST00000257831.3	ets homologous factor	hsa-miR-142-3p.1	Downregulated	-0.33
LLGL2	ENST00000392550.3	lethal giant larvae homolog 2 (Drosophila)	hsa-miR-142-3p.1	Downregulated	-0.33
ANXA5	ENST00000296511.5	annexin A5	hsa-miR-124-3p.1	Upregulated	-0.33
BCL2L11	ENST00000393256.3	BCL2-like 11 (apoptosis facilitator)	hsa-miR-124-3p.1	Upregulated	-0.33
SPTLC1	ENST00000262554.2	serine palmitoyltransferase, long chain base subunit 1	hsa-miR-124-3p.1	Upregulated	-0.33
PLXNB2	ENST00000449103.1	plexin B2	hsa-miR-124-3p.1	Upregulated	-0.33
CAPN1	ENST00000533820.1	calpain 1, (mu/I) large subunit	hsa-miR-124-3p.1	Upregulated	-0.33
CPEB1	ENST00000450751.2	cytoplasmic polyadenylation element binding protein 1	hsa-miR-124-3p.1	Upregulated	-0.33
MST4	ENST00000394334.2	Serine/threonine-protein kinase MST4	hsa-miR-124-3p.1	Upregulated	-0.33
RAP2B	ENST00000323534.2	RAP2B, member of RAS oncogene family	hsa-miR-124-3p.1	Upregulated	-0.33
PEMT	ENST00000435340.2	phosphatidylethanolamine N-methyltransferase	hsa-miR-124-3p.1	Upregulated	-0.33
CCND3	ENST00000372991.4	cyclin D3	hsa-miR-124-3p.1	Upregulated	-0.33
ZNF131	ENST00000505606.2	zinc finger protein 131	hsa-miR-124-3p.1	Upregulated	-0.33
INSIG2	ENST00000245787.4	insulin induced gene 2	hsa-miR-124-3p.1	Upregulated	-0.33
ZNF608	ENST00000504926.1	zinc finger protein 608	hsa-miR-124-3p.1	Upregulated	-0.33
PLEKHF1	ENST00000436066.3	pleckstrin homology domain containing, family F (with FYVE domain) member 1	hsa-miR-124-3p.1	Upregulated	-0.33
VEZF1	ENST00000584396.1	vascular endothelial zinc finger 1	hsa-miR-124-3p.1	Upregulated	-0.33
CCND2	ENST00000261254.3	cyclin D2	hsa-miR-124-3p.1	Upregulated	-0.33
OSBPL3	ENST00000313367.2	oxysterol binding protein-like 3	hsa-miR-124-3p.1	Upregulated	-0.33
DACT1	ENST00000395153.3	dishevelled-binding antagonist of beta-catenin 1	hsa-miR-124-3p.1	Upregulated	-0.33
RHOU	ENST00000366691.3	ras homolog family member U	hsa-miR-124-3p.1	Upregulated	-0.33
FAM127B	ENST00000370775.2	family with sequence similarity 127, member B	hsa-miR-124-3p.1	Upregulated	-0.33
TEX261	ENST00000272438.4	testis expressed 261	hsa-miR-124-3p.1	Upregulated	-0.33
YY1	ENST00000262238.4	YY1 transcription factor	hsa-miR-124-3p.1	Upregulated	-0.33
ST8SIA4	ENST00000231461.5	ST8 alpha-N-acetyl-neuraminide alpha-2,8-sialyltransferase 4	hsa-miR-124-3p.1	Upregulated	-0.33
KLLN	ENST00000445946.3	killin, p53-regulated DNA replication inhibitor	hsa-miR-124-3p.1	Upregulated	-0.33
FSD1L	ENST00000374710.3	fibronectin type III and SPRY domain containing 1-like	hsa-miR-124-3p.1	Upregulated	-0.33
ZMAT3	ENST00000311417.2	zinc finger, matrin-type 3	hsa-miR-124-3p.1	Upregulated	-0.33
RCAN1	ENST00000482533.1	regulator of calcineurin 1	hsa-miR-124-3p.1	Upregulated	-0.33
PTPRJ	ENST00000418331.2	protein tyrosine phosphatase, receptor type, J	hsa-miR-124-3p.1	Upregulated	-0.33
ETV3	ENST00000368192.4	ets variant 3	hsa-miR-124-3p.1	Upregulated	-0.33
FAM133B	ENST00000438306.1	family with sequence similarity 133, member B	hsa-miR-124-3p.1	Upregulated	-0.33
HIVEP1	ENST00000379388.2	human immunodeficiency virus type I enhancer binding protein 1	hsa-miR-124-3p.1	Upregulated	-0.33
PPP1R3D	ENST00000370996.3	protein phosphatase 1, regulatory subunit 3D	hsa-miR-124-3p.1	Upregulated	-0.33
FGFR1OP	ENST00000366847.4	FGFR1 oncogene partner	hsa-miR-124-3p.1	Upregulated	-0.33
SGPP1	ENST00000247225.6	sphingosine-1-phosphate phosphatase 1	hsa-miR-124-3p.1	Upregulated	-0.33
CPOX	ENST00000264193.2	coproporphyrinogen oxidase	hsa-miR-124-3p.1	Upregulated	-0.33
SSFA2	ENST00000431877.2	sperm specific antigen 2	hsa-miR-124-3p.1	Upregulated	-0.33
CDS1	ENST00000295887.5	CDP-diacylglycerol synthase (phosphatidate cytidylyltransferase) 1	hsa-miR-129-1-3p	Upregulated	-0.33
CA7	ENST00000394069.3	carbonic anhydrase VII	hsa-miR-129-1-3p	Upregulated	-0.33
LPAR3	ENST00000440886.1	lysophosphatidic acid receptor 3	hsa-miR-129-1-3p	Upregulated	-0.33
JPH4	ENST00000356300.4	junctophilin 4	hsa-miR-129-1-3p	Upregulated	-0.33
VEZT	ENST00000436874.1	vezatin, adherens junctions transmembrane protein	hsa-miR-129-1-3p	Upregulated	-0.33
TIAM1	ENST00000286827.3	T-cell lymphoma invasion and metastasis 1	hsa-miR-129-1-3p	Upregulated	-0.33
SMIM14	ENST00000295958.5	small integral membrane protein 14	hsa-miR-129-1-3p	Upregulated	-0.33
ELOVL6	ENST00000394607.3	ELOVL fatty acid elongase 6	hsa-miR-129-1-3p	Upregulated	-0.33
BZW1	ENST00000409600.1	basic leucine zipper and W2 domains 1	hsa-miR-129-1-3p	Upregulated	-0.33
RUNX2	ENST00000371432.3	runt-related transcription factor 2	hsa-miR-129-1-3p	Upregulated	-0.33
PPP1R14C	ENST00000361131.4	protein phosphatase 1, regulatory (inhibitor) subunit 14C	hsa-miR-129-1-3p	Upregulated	-0.33
HMGCS1	ENST00000325110.6	3-hydroxy-3-methylglutaryl-CoA synthase 1 (soluble)	hsa-miR-129-1-3p	Upregulated	-0.33
MAP3K1	ENST00000399503.3	mitogen-activated protein kinase kinase kinase 1, E3 ubiquitin protein ligase	hsa-miR-129-1-3p	Upregulated	-0.33
DSE	ENST00000452085.3	dermatan sulfate epimerase	hsa-miR-9-5p	Upregulated	-0.33
INHBB	ENST00000295228.3	inhibin, beta B	hsa-miR-9-5p	Upregulated	-0.33
PAK4	ENST00000599386.1	p21 protein (Cdc42/Rac)-activated kinase 4	hsa-miR-9-5p	Upregulated	-0.33
IGF2BP2	ENST00000382199.2	insulin-like growth factor 2 mRNA binding protein 2	hsa-miR-9-5p	Upregulated	-0.33
SHC1	ENST00000368445.5	SHC (Src homology 2 domain containing) transforming protein 1	hsa-miR-9-5p	Upregulated	-0.33
CSGALNACT1	ENST00000454498.2	chondroitin sulfate N-acetylgalactosaminyltransferase 1	hsa-miR-9-5p	Upregulated	-0.33
SLC8A1	ENST00000406785.2	solute carrier family 8 (sodium/calcium exchanger), member 1	hsa-miR-9-5p	Upregulated	-0.33
CHST15	ENST00000346248.5	carbohydrate (N-acetylgalactosamine 4-sulfate 6-O) sulfotransferase 15	hsa-miR-9-5p	Upregulated	-0.33
ATL2	ENST00000406122.1	atlastin GTPase 2	hsa-miR-9-5p	Upregulated	-0.33
GNPNAT1	ENST00000216410.3	glucosamine-phosphate N-acetyltransferase 1	hsa-miR-9-5p	Upregulated	-0.33
COL27A1	ENST00000356083.3	collagen, type XXVII, alpha 1	hsa-miR-9-5p	Upregulated	-0.33
SIX5	ENST00000560168.1	SIX homeobox 5	hsa-miR-9-5p	Upregulated	-0.33
RHOJ	ENST00000316754.3	ras homolog family member J	hsa-miR-9-5p	Upregulated	-0.33
PANK3	ENST00000239231.6	pantothenate kinase 3	hsa-miR-9-5p	Upregulated	-0.33
CSNK1A1	ENST00000261798.5	casein kinase 1, alpha 1	hsa-miR-9-5p	Upregulated	-0.33
YY1	ENST00000262238.4	YY1 transcription factor	hsa-miR-219a-2-3p	Upregulated	-0.33
TSNAX	ENST00000366639.4	translin-associated factor X	hsa-miR-219a-2-3p	Upregulated	-0.33
MAPK8	ENST00000374182.3	mitogen-activated protein kinase 8	hsa-miR-219a-2-3p	Upregulated	-0.33
SERINC1	ENST00000339697.4	serine incorporator 1	hsa-miR-219a-2-3p	Upregulated	-0.33
UPF3B	ENST00000276201.2	UPF3 regulator of nonsense transcripts homolog B (yeast)	hsa-miR-219a-5p	Upregulated	-0.33
SP4	ENST00000222584.3	Sp4 transcription factor	hsa-miR-219a-5p	Upregulated	-0.33
FBXL17	ENST00000359660.5	F-box and leucine-rich repeat protein 17	hsa-miR-219a-5p	Upregulated	-0.33
RAB21	ENST00000261263.3	RAB21, member RAS oncogene family	hsa-miR-199b-5p	Downregulated	-0.32
PHACTR4	ENST00000373839.3	phosphatase and actin regulator 4	hsa-miR-199a-5p	Downregulated	-0.32
WDR44	ENST00000254029.3	WD repeat domain 44	hsa-miR-199a-5p	Downregulated	-0.32
CREBRF	ENST00000540014.1	CREB3 regulatory factor	hsa-miR-199a-5p	Downregulated	-0.32
ANK3	ENST00000280772.2	ankyrin 3, node of Ranvier (ankyrin G)	hsa-miR-199a-5p	Downregulated	-0.32
ITGA3	ENST00000007722.7	integrin, alpha 3 (antigen CD49C, alpha 3 subunit of VLA-3 receptor)	hsa-miR-199a-5p	Downregulated	-0.32
TMEM215	ENST00000342743.5	transmembrane protein 215	hsa-miR-199a-5p	Downregulated	-0.32
ZNF629	ENST00000262525.4	zinc finger protein 629	hsa-miR-199a-5p	Downregulated	-0.32
CHN2	ENST00000222792.6	chimerin 2	hsa-miR-199a-5p	Downregulated	-0.32
MCFD2	ENST00000444761.2	multiple coagulation factor deficiency 2	hsa-miR-199a-5p	Downregulated	-0.32
EHD4	ENST00000220325.4	EH-domain containing 4	hsa-miR-199a-5p	Downregulated	-0.32
MINK1	ENST00000347992.7	misshapen-like kinase 1	hsa-miR-199a-5p	Downregulated	-0.32
ZNF654	ENST00000309495.5	zinc finger protein 654	hsa-miR-199a-5p	Downregulated	-0.32
GPD2	ENST00000540309.1	glycerol-3-phosphate dehydrogenase 2 (mitochondrial)	hsa-miR-199a-5p	Downregulated	-0.32
ACVR1B	ENST00000257963.4	activin A receptor, type IB	hsa-miR-199b-5p	Downregulated	-0.32
HACE1	ENST00000262903.4	HECT domain and ankyrin repeat containing E3 ubiquitin protein ligase 1	hsa-miR-199a-3p	Downregulated	-0.32
SLC38A1	ENST00000398637.5	solute carrier family 38, member 1	hsa-miR-199a-3p	Downregulated	-0.32
MPP7	ENST00000375732.1	membrane protein, palmitoylated 7 (MAGUK p55 subfamily member 7)	hsa-miR-199a-3p	Downregulated	-0.32
FLRT3	ENST00000378053.3	fibronectin leucine rich transmembrane protein 3	hsa-miR-199a-3p	Downregulated	-0.32
CITED2	ENST00000367651.2	Cbp/p300-interacting transactivator, with Glu/Asp-rich carboxy-terminal domain, 2	hsa-miR-199a-3p	Downregulated	-0.32
TGIF2	ENST00000373874.2	TGFB-induced factor homeobox 2	hsa-miR-199a-3p	Downregulated	-0.32
TP53	ENST00000420246.2	tumor protein p53	hsa-miR-150-5p	Downregulated	-0.32
CAST	ENST00000395812.2	calpastatin	hsa-miR-150-5p	Downregulated	-0.32
SHISA4	ENST00000362011.6	shisa family member 4	hsa-miR-150-5p	Downregulated	-0.32
ADAMTS3	ENST00000286657.4	ADAM metallopeptidase with thrombospondin type 1 motif, 3	hsa-miR-142-3p.1	Downregulated	-0.32
STAU1	ENST00000371828.3	staufen double-stranded RNA binding protein 1	hsa-miR-142-3p.1	Downregulated	-0.32
SPRED1	ENST00000299084.4	sprouty-related, EVH1 domain containing 1	hsa-miR-142-3p.1	Downregulated	-0.32
PSMD11	ENST00000261712.3	proteasome (prosome, macropain) 26S subunit, non-ATPase, 11	hsa-miR-142-3p.1	Downregulated	-0.32
IL7R	ENST00000343305.4	interleukin 7 receptor	hsa-miR-142-3p.1	Downregulated	-0.32
IPO7	ENST00000379719.3	importin 7	hsa-miR-142-3p.1	Downregulated	-0.32
FBXO21	ENST00000427718.2	F-box protein 21	hsa-miR-142-3p.1	Downregulated	-0.32
FKBP1A	ENST00000400137.4	FK506 binding protein 1A, 12kDa	hsa-miR-142-3p.1	Downregulated	-0.32
PIK3R6	ENST00000311434.9	phosphoinositide-3-kinase, regulatory subunit 6	hsa-miR-142-3p.1	Downregulated	-0.32
ITGA7	ENST00000257880.7	integrin, alpha 7	hsa-miR-124-3p.1	Upregulated	-0.32
STEAP3	ENST00000409811.1	STEAP family member 3, metalloreductase	hsa-miR-124-3p.1	Upregulated	-0.32
NUDCD2	ENST00000302764.4	NudC domain containing 2	hsa-miR-124-3p.1	Upregulated	-0.32
LRCH4	ENST00000310300.6	leucine-rich repeats and calponin homology (CH) domain containing 4	hsa-miR-124-3p.1	Upregulated	-0.32
DCAKD	ENST00000452796.2	dephospho-CoA kinase domain containing	hsa-miR-124-3p.1	Upregulated	-0.32
TRIP10	ENST00000313285.8	thyroid hormone receptor interactor 10	hsa-miR-124-3p.1	Upregulated	-0.32
TRIM39	ENST00000396551.3	tripartite motif containing 39	hsa-miR-124-3p.1	Upregulated	-0.32
PCDH1	ENST00000503492.1	protocadherin 1	hsa-miR-124-3p.1	Upregulated	-0.32
KAT7	ENST00000259021.4	K(lysine) acetyltransferase 7	hsa-miR-124-3p.1	Upregulated	-0.32
LDLRAP1	ENST00000374338.4	low density lipoprotein receptor adaptor protein 1	hsa-miR-124-3p.1	Upregulated	-0.32
SLCO4C1	ENST00000310954.6	solute carrier organic anion transporter family, member 4C1	hsa-miR-124-3p.1	Upregulated	-0.32
VAMP7	ENST00000286448.6	vesicle-associated membrane protein 7	hsa-miR-124-3p.1	Upregulated	-0.32
NAP1L3	ENST00000373079.3	nucleosome assembly protein 1-like 3	hsa-miR-124-3p.1	Upregulated	-0.32
PIP4K2C	ENST00000354947.5	phosphatidylinositol-5-phosphate 4-kinase, type II, gamma	hsa-miR-124-3p.1	Upregulated	-0.32
PTPN11	ENST00000351677.2	protein tyrosine phosphatase, non-receptor type 11	hsa-miR-124-3p.1	Upregulated	-0.32
ROR2	ENST00000375708.3	receptor tyrosine kinase-like orphan receptor 2	hsa-miR-124-3p.1	Upregulated	-0.32
SLC9A9	ENST00000316549.6	solute carrier family 9, subfamily A (NHE9, cation proton antiporter 9), member 9	hsa-miR-124-3p.1	Upregulated	-0.32
FNIP2	ENST00000264433.6	folliculin interacting protein 2	hsa-miR-124-3p.1	Upregulated	-0.32
ST8SIA2	ENST00000268164.3	ST8 alpha-N-acetyl-neuraminide alpha-2,8-sialyltransferase 2	hsa-miR-124-3p.1	Upregulated	-0.32
TMEM129	ENST00000303277.2	transmembrane protein 129	hsa-miR-124-3p.1	Upregulated	-0.32
HSPB8	ENST00000281938.2	heat shock 22kDa protein 8	hsa-miR-124-3p.1	Upregulated	-0.32
CDC14A	ENST00000370125.2	cell division cycle 14A	hsa-miR-124-3p.1	Upregulated	-0.32
SP1	ENST00000426431.2	Sp1 transcription factor	hsa-miR-124-3p.1	Upregulated	-0.32
RPIA	ENST00000283646.4	ribose 5-phosphate isomerase A	hsa-miR-124-3p.1	Upregulated	-0.32
LEMD3	ENST00000308330.2	LEM domain containing 3	hsa-miR-124-3p.1	Upregulated	-0.32
NEURL1B	ENST00000369800.5	neuralized homolog 1B (Drosophila)	hsa-miR-124-3p.1	Upregulated	-0.32
POGLUT1	ENST00000295588.4	protein O-glucosyltransferase 1	hsa-miR-124-3p.1	Upregulated	-0.32
NFIX	ENST00000360105.4	nuclear factor I/X (CCAAT-binding transcription factor)	hsa-miR-124-3p.1	Upregulated	-0.32
PTDSS1	ENST00000517309.1	phosphatidylserine synthase 1	hsa-miR-124-3p.1	Upregulated	-0.32
LIPE	ENST00000244289.4	lipase, hormone-sensitive	hsa-miR-124-3p.1	Upregulated	-0.32
SNX30	ENST00000374232.3	sorting nexin family member 30	hsa-miR-124-3p.1	Upregulated	-0.32
RRAGD	ENST00000369415.4	Ras-related GTP binding D	hsa-miR-124-3p.1	Upregulated	-0.32
HOXA5	ENST00000222726.3	homeobox A5	hsa-miR-124-3p.1	Upregulated	-0.32
TSHZ1	ENST00000322038.5	teashirt zinc finger homeobox 1	hsa-miR-124-3p.1	Upregulated	-0.32
PHACTR2	ENST00000427704.2	phosphatase and actin regulator 2	hsa-miR-124-3p.1	Upregulated	-0.32
MLXIP	ENST00000319080.7	MLX interacting protein	hsa-miR-124-3p.1	Upregulated	-0.32
HOXB1	ENST00000239174.6	homeobox B1	hsa-miR-124-3p.1	Upregulated	-0.32
MYCBP	ENST00000397572.2	MYC binding protein	hsa-miR-124-3p.1	Upregulated	-0.32
KIRREL	ENST00000368172.1	kin of IRRE like (Drosophila)	hsa-miR-124-3p.1	Upregulated	-0.32
RNF141	ENST00000265981.2	ring finger protein 141	hsa-miR-124-3p.1	Upregulated	-0.32
C10orf137	ENST00000337623.3	chromosome 10 open reading frame 137	hsa-miR-124-3p.1	Upregulated	-0.32
SLC35A4	ENST00000323146.3	solute carrier family 35, member A4	hsa-miR-124-3p.1	Upregulated	-0.32
FMR1	ENST00000370471.3	fragile X mental retardation 1	hsa-miR-124-3p.1	Upregulated	-0.32
FLRT2	ENST00000330753.4	fibronectin leucine rich transmembrane protein 2	hsa-miR-129-1-3p	Upregulated	-0.32
MYEF2	ENST00000324324.7	myelin expression factor 2	hsa-miR-129-1-3p	Upregulated	-0.32
UNK	ENST00000293218.3	unkempt homolog (Drosophila)	hsa-miR-129-2-3p	Upregulated	-0.32
SACS	ENST00000402364.1	spastic ataxia of Charlevoix-Saguenay (sacsin)	hsa-miR-129-1-3p	Upregulated	-0.32
E2F5	ENST00000418930.2	E2F transcription factor 5, p130-binding	hsa-miR-129-1-3p	Upregulated	-0.32
FZD10	ENST00000539839.1	frizzled family receptor 10	hsa-miR-129-1-3p	Upregulated	-0.32
TOMM40L	ENST00000367987.1	translocase of outer mitochondrial membrane 40 homolog (yeast)-like	hsa-miR-129-1-3p	Upregulated	-0.32
KIAA0430	ENST00000396368.3	KIAA0430	hsa-miR-129-2-3p	Upregulated	-0.32
FAM135B	ENST00000395297.1	family with sequence similarity 135, member B	hsa-miR-129-1-3p	Upregulated	-0.32
RASAL2	ENST00000448150.3	RAS protein activator like 2	hsa-miR-129-1-3p	Upregulated	-0.32
BCL2L2	ENST00000250405.5	BCL2-like 2	hsa-miR-129-2-3p	Upregulated	-0.32
GABRA1	ENST00000428797.2	gamma-aminobutyric acid (GABA) A receptor, alpha 1	hsa-miR-129-1-3p	Upregulated	-0.32
DLGAP2	ENST00000421627.2	discs, large (Drosophila) homolog-associated protein 2	hsa-miR-9-5p	Upregulated	-0.32
C2CD2	ENST00000329623.7	C2 calcium-dependent domain containing 2	hsa-miR-9-5p	Upregulated	-0.32
IGF2BP3	ENST00000258729.3	insulin-like growth factor 2 mRNA binding protein 3	hsa-miR-9-5p	Upregulated	-0.32
ULK2	ENST00000395544.4	unc-51 like autophagy activating kinase 2	hsa-miR-9-5p	Upregulated	-0.32
GMEB2	ENST00000370069.1	glucocorticoid modulatory element binding protein 2	hsa-miR-9-5p	Upregulated	-0.32
RUNX1T1	ENST00000523629.1	runt-related transcription factor 1; translocated to, 1 (cyclin D-related)	hsa-miR-9-5p	Upregulated	-0.32
NEDD4	ENST00000338963.2	neural precursor cell expressed, developmentally down-regulated 4, E3 ubiquitin protein ligase	hsa-miR-9-5p	Upregulated	-0.32
BEST3	ENST00000488961.1	bestrophin 3	hsa-miR-9-5p	Upregulated	-0.32
ACTR3	ENST00000263238.2	ARP3 actin-related protein 3 homolog (yeast)	hsa-miR-9-5p	Upregulated	-0.32
ZBED3	ENST00000255198.2	zinc finger, BED-type containing 3	hsa-miR-9-5p	Upregulated	-0.32
TRERF1	ENST00000541110.1	transcriptional regulating factor 1	hsa-miR-9-5p	Upregulated	-0.32
LAMP1	ENST00000332556.4	lysosomal-associated membrane protein 1	hsa-miR-9-5p	Upregulated	-0.32
FAM13C	ENST00000373867.3	family with sequence similarity 13, member C	hsa-miR-9-5p	Upregulated	-0.32
MAN1A2	ENST00000356554.3	mannosidase, alpha, class 1A, member 2	hsa-miR-9-5p	Upregulated	-0.32
PPP1R2	ENST00000328432.3	protein phosphatase 1, regulatory (inhibitor) subunit 2	hsa-miR-219a-2-3p	Upregulated	-0.32
ETV5	ENST00000306376.5	ets variant 5	hsa-miR-219a-5p	Upregulated	-0.32
HOXD13	ENST00000392539.3	homeobox D13	hsa-miR-219a-5p	Upregulated	-0.32
ZNRF2	ENST00000323037.4	zinc and ring finger 2	hsa-miR-219a-5p	Upregulated	-0.32
RNF6	ENST00000346166.3	ring finger protein (C3H2C3 type) 6	hsa-miR-219a-5p	Upregulated	-0.32
NECAP1	ENST00000339754.5	NECAP endocytosis associated 1	hsa-miR-219a-5p	Upregulated	-0.32
KCNJ2	ENST00000243457.3	potassium inwardly-rectifying channel, subfamily J, member 2	hsa-miR-219a-5p	Upregulated	-0.32
FAM199X	ENST00000493442.1	family with sequence similarity 199, X-linked	hsa-miR-219a-5p	Upregulated	-0.32
MEF2D	ENST00000464356.2	myocyte enhancer factor 2D	hsa-miR-219a-5p	Upregulated	-0.32
GSK3B	ENST00000264235.8	glycogen synthase kinase 3 beta	hsa-miR-199b-5p	Downregulated	-0.31
E2F6	ENST00000362009.4	E2F transcription factor 6	hsa-miR-199b-5p	Downregulated	-0.31
MFSD6	ENST00000392328.1	major facilitator superfamily domain containing 6	hsa-miR-199a-5p	Downregulated	-0.31
TTC9	ENST00000256367.2	tetratricopeptide repeat domain 9	hsa-miR-199a-5p	Downregulated	-0.31
DERL2	ENST00000572834.1	derlin 2	hsa-miR-199a-5p	Downregulated	-0.31
TAB3	ENST00000378933.1	TGF-beta activated kinase 1/MAP3K7 binding protein 3	hsa-miR-199a-5p	Downregulated	-0.31
FBXO30	ENST00000237281.4	F-box protein 30	hsa-miR-199b-5p	Downregulated	-0.31
CCBL2	ENST00000370485.2	cysteine conjugate-beta lyase 2	hsa-miR-199a-5p	Downregulated	-0.31
NLK	ENST00000407008.3	nemo-like kinase	hsa-miR-199a-5p	Downregulated	-0.31
DDHD1	ENST00000323669.5	DDHD domain containing 1	hsa-miR-199a-3p	Downregulated	-0.31
MARS2	ENST00000282276.6	methionyl-tRNA synthetase 2, mitochondrial	hsa-miR-199a-3p	Downregulated	-0.31
ANKRD44	ENST00000282272.8	ankyrin repeat domain 44	hsa-miR-199a-3p	Downregulated	-0.31
NRIP1	ENST00000400199.1	nuclear receptor interacting protein 1	hsa-miR-199a-3p	Downregulated	-0.31
MEIS2	ENST00000397624.3	Meis homeobox 2	hsa-miR-199a-3p	Downregulated	-0.31
MAGT1	ENST00000358075.6	magnesium transporter 1	hsa-miR-199a-3p	Downregulated	-0.31
MAP3K5	ENST00000359015.4	mitogen-activated protein kinase kinase kinase 5	hsa-miR-199a-3p	Downregulated	-0.31
OSBPL9	ENST00000371710.3	oxysterol binding protein-like 9	hsa-miR-150-5p	Downregulated	-0.31
GRIPAP1	ENST00000376425.3	GRIP1 associated protein 1	hsa-miR-150-5p	Downregulated	-0.31
FOXD3	ENST00000371116.2	forkhead box D3	hsa-miR-150-5p	Downregulated	-0.31
ZFP91	ENST00000316059.6	ZFP91 zinc finger protein	hsa-miR-150-5p	Downregulated	-0.31
CRTAM	ENST00000227348.4	cytotoxic and regulatory T cell molecule	hsa-miR-142-3p.1	Downregulated	-0.31
MAP4K3	ENST00000263881.3	mitogen-activated protein kinase kinase kinase kinase 3	hsa-miR-142-3p.1	Downregulated	-0.31
BCLAF1	ENST00000531224.1	BCL2-associated transcription factor 1	hsa-miR-142-3p.1	Downregulated	-0.31
CRK	ENST00000398970.5	v-crk avian sarcoma virus CT10 oncogene homolog	hsa-miR-142-3p.1	Downregulated	-0.31
SHC4	ENST00000332408.4	SHC (Src homology 2 domain containing) family, member 4	hsa-miR-124-3p.1	Upregulated	-0.31
BCL11B	ENST00000357195.3	B-cell CLL/lymphoma 11B (zinc finger protein)	hsa-miR-124-3p.1	Upregulated	-0.31
IQGAP2	ENST00000274364.6	IQ motif containing GTPase activating protein 2	hsa-miR-124-3p.1	Upregulated	-0.31
BCL6	ENST00000406870.2	B-cell CLL/lymphoma 6	hsa-miR-124-3p.1	Upregulated	-0.31
FSBP	ENST00000481490.2	fibrinogen silencer binding protein	hsa-miR-124-3p.1	Upregulated	-0.31
JAG1	ENST00000254958.5	jagged 1	hsa-miR-124-3p.1	Upregulated	-0.31
PEX19	ENST00000368072.5	peroxisomal biogenesis factor 19	hsa-miR-124-3p.1	Upregulated	-0.31
CHODL	ENST00000400128.1	chondrolectin	hsa-miR-124-3p.1	Upregulated	-0.31
FAM92B	ENST00000539556.1	family with sequence similarity 92, member B	hsa-miR-124-3p.1	Upregulated	-0.31
SVIL	ENST00000375400.3	supervillin	hsa-miR-124-3p.1	Upregulated	-0.31
SLC25A30	ENST00000539591.1	solute carrier family 25, member 30	hsa-miR-124-3p.1	Upregulated	-0.31
HEATR1	ENST00000366582.3	HEAT repeat containing 1	hsa-miR-124-3p.1	Upregulated	-0.31
LIF	ENST00000403987.3	leukemia inhibitory factor	hsa-miR-124-3p.1	Upregulated	-0.31
YEATS2	ENST00000305135.5	YEATS domain containing 2	hsa-miR-124-3p.1	Upregulated	-0.31
SNX6	ENST00000396526.3	sorting nexin 6	hsa-miR-124-3p.1	Upregulated	-0.31
ZNF432	ENST00000594154.1	zinc finger protein 432	hsa-miR-124-3p.1	Upregulated	-0.31
FUT10	ENST00000327671.5	fucosyltransferase 10 (alpha (1,3) fucosyltransferase)	hsa-miR-124-3p.1	Upregulated	-0.31
DRAM1	ENST00000258534.8	DNA-damage regulated autophagy modulator 1	hsa-miR-124-3p.1	Upregulated	-0.31
USO1	ENST00000538159.1	USO1 vesicle transport factor	hsa-miR-124-3p.1	Upregulated	-0.31
BCKDHA	ENST00000269980.2	branched chain keto acid dehydrogenase E1, alpha polypeptide	hsa-miR-124-3p.1	Upregulated	-0.31
LNX2	ENST00000316334.3	ligand of numb-protein X 2	hsa-miR-124-3p.1	Upregulated	-0.31
DSC1	ENST00000257197.3	desmocollin 1	hsa-miR-124-3p.1	Upregulated	-0.31
MGAT5	ENST00000409645.1	mannosyl (alpha-1,6-)-glycoprotein beta-1,6-N-acetyl-glucosaminyltransferase	hsa-miR-124-3p.1	Upregulated	-0.31
GFPT2	ENST00000253778.8	glutamine-fructose-6-phosphate transaminase 2	hsa-miR-124-3p.1	Upregulated	-0.31
AIDA	ENST00000340020.6	axin interactor, dorsalization associated	hsa-miR-124-3p.1	Upregulated	-0.31
MDGA2	ENST00000439988.3	MAM domain-containing glycosylphosphatidylinositol anchor protein 2	hsa-miR-124-3p.1	Upregulated	-0.31
NRP1	ENST00000374875.1	neuropilin 1	hsa-miR-124-3p.1	Upregulated	-0.31
ADAMTS20	ENST00000389420.3	ADAM metallopeptidase with thrombospondin type 1 motif, 20	hsa-miR-124-3p.1	Upregulated	-0.31
MYO10	ENST00000513610.1	myosin X	hsa-miR-124-3p.1	Upregulated	-0.31
GRIA2	ENST00000296526.7	glutamate receptor, ionotropic, AMPA 2	hsa-miR-124-3p.1	Upregulated	-0.31
BEAN1	ENST00000299694.8	brain expressed, associated with NEDD4, 1	hsa-miR-129-1-3p	Upregulated	-0.31
GNA13	ENST00000439174.2	guanine nucleotide binding protein (G protein), alpha 13	hsa-miR-129-1-3p	Upregulated	-0.31
IFITM10	ENST00000340134.4	interferon induced transmembrane protein 10	hsa-miR-129-1-3p	Upregulated	-0.31
FAM155A	ENST00000375915.2	family with sequence similarity 155, member A	hsa-miR-129-1-3p	Upregulated	-0.31
ZNF221	ENST00000251269.5	zinc finger protein 221	hsa-miR-129-1-3p	Upregulated	-0.31
GNAQ	ENST00000286548.4	guanine nucleotide binding protein (G protein), q polypeptide	hsa-miR-129-1-3p	Upregulated	-0.31
TCF7	ENST00000518915.1	transcription factor 7 (T-cell specific, HMG-box)	hsa-miR-9-5p	Upregulated	-0.31
PBRM1	ENST00000356770.4	polybromo 1	hsa-miR-9-5p	Upregulated	-0.31
RTN4RL1	ENST00000331238.6	reticulon 4 receptor-like 1	hsa-miR-9-5p	Upregulated	-0.31
DIAPH2	ENST00000324765.8	diaphanous-related formin 2	hsa-miR-9-5p	Upregulated	-0.31
CA7	ENST00000394069.3	carbonic anhydrase VII	hsa-miR-9-5p	Upregulated	-0.31
P4HA2	ENST00000401867.1	prolyl 4-hydroxylase, alpha polypeptide II	hsa-miR-9-5p	Upregulated	-0.31
HAPLN1	ENST00000274341.4	hyaluronan and proteoglycan link protein 1	hsa-miR-9-5p	Upregulated	-0.31
BAG4	ENST00000287322.4	BCL2-associated athanogene 4	hsa-miR-9-5p	Upregulated	-0.31
AGAP2-AS1	ENST00000542466.2	AGAP2 antisense RNA 1	hsa-miR-9-5p	Upregulated	-0.31
ENTPD5	ENST00000334696.6	ectonucleoside triphosphate diphosphohydrolase 5	hsa-miR-9-5p	Upregulated	-0.31
STMN1	ENST00000455785.2	stathmin 1	hsa-miR-9-5p	Upregulated	-0.31
HLTF	ENST00000465259.1	helicase-like transcription factor	hsa-miR-9-5p	Upregulated	-0.31
GNA14	ENST00000341700.6	guanine nucleotide binding protein (G protein), alpha 14	hsa-miR-9-5p	Upregulated	-0.31
VANGL1	ENST00000355485.2	VANGL planar cell polarity protein 1	hsa-miR-9-5p	Upregulated	-0.31
ZNF354A	ENST00000335815.2	zinc finger protein 354A	hsa-miR-9-5p	Upregulated	-0.31
FGF5	ENST00000456523.3	fibroblast growth factor 5	hsa-miR-9-5p	Upregulated	-0.31
POU2F3	ENST00000260264.4	POU class 2 homeobox 3	hsa-miR-9-5p	Upregulated	-0.31
SLC25A35	ENST00000577745.1	solute carrier family 25, member 35	hsa-miR-9-5p	Upregulated	-0.31
LZTS2	ENST00000370223.3	leucine zipper, putative tumor suppressor 2	hsa-miR-9-5p	Upregulated	-0.31
LIN28A	ENST00000326279.6	lin-28 homolog A (C. elegans)	hsa-miR-9-5p	Upregulated	-0.31
RAB8A	ENST00000300935.3	RAB8A, member RAS oncogene family	hsa-miR-9-5p	Upregulated	-0.31
SH3BP5	ENST00000383791.3	SH3-domain binding protein 5 (BTK-associated)	hsa-miR-219a-2-3p	Upregulated	-0.31
GAB1	ENST00000262995.4	GRB2-associated binding protein 1	hsa-miR-219a-2-3p	Upregulated	-0.31
SUV39H2	ENST00000313519.5	suppressor of variegation 3-9 homolog 2 (Drosophila)	hsa-miR-219a-2-3p	Upregulated	-0.31
TMED2	ENST00000262225.3	transmembrane emp24 domain trafficking protein 2	hsa-miR-219a-2-3p	Upregulated	-0.31
PRKCI	ENST00000295797.4	protein kinase C, iota	hsa-miR-219a-5p	Upregulated	-0.31
ADRA2C	ENST00000330055.5	adrenoceptor alpha 2C	hsa-miR-219a-5p	Upregulated	-0.31
CPNE2	ENST00000290776.8	copine II	hsa-miR-219a-5p	Upregulated	-0.31
NFIB	ENST00000397575.3	nuclear factor I/B	hsa-miR-219a-5p	Upregulated	-0.31
BROX	ENST00000537020.1	BRO1 domain and CAAX motif containing	hsa-miR-199a-5p	Downregulated	-0.3
ATP13A2	ENST00000326735.8	ATPase type 13A2	hsa-miR-199a-5p	Downregulated	-0.3
FIGN	ENST00000333129.3	fidgetin	hsa-miR-199a-5p	Downregulated	-0.3
KIAA0040	ENST00000423313.1	KIAA0040	hsa-miR-199a-5p	Downregulated	-0.3
OTX1	ENST00000366671.3	orthodenticle homeobox 1	hsa-miR-199a-5p	Downregulated	-0.3
PAXBP1	ENST00000331923.4	PAX3 and PAX7 binding protein 1	hsa-miR-199a-5p	Downregulated	-0.3
PLXNC1	ENST00000258526.4	plexin C1	hsa-miR-199a-5p	Downregulated	-0.3
AQP11	ENST00000313578.3	aquaporin 11	hsa-miR-199b-5p	Downregulated	-0.3
HSPA4	ENST00000304858.2	heat shock 70kDa protein 4	hsa-miR-199a-5p	Downregulated	-0.3
CCDC88C	ENST00000389857.6	coiled-coil domain containing 88C	hsa-miR-199a-5p	Downregulated	-0.3
PDE4D	ENST00000340635.6	phosphodiesterase 4D, cAMP-specific	hsa-miR-199a-5p	Downregulated	-0.3
PDE7A	ENST00000401827.3	phosphodiesterase 7A	hsa-miR-199a-3p	Downregulated	-0.3
YWHAZ	ENST00000395957.2	tyrosine 3-monooxygenase/tryptophan 5-monooxygenase activation protein, zeta polypeptide	hsa-miR-199a-3p	Downregulated	-0.3
RAP2A	ENST00000245304.4	RAP2A, member of RAS oncogene family	hsa-miR-199a-3p	Downregulated	-0.3
EDEM3	ENST00000318130.8	ER degradation enhancer, mannosidase alpha-like 3	hsa-miR-199a-3p	Downregulated	-0.3
PTAR1	ENST00000377200.5	protein prenyltransferase alpha subunit repeat containing 1	hsa-miR-199a-3p	Downregulated	-0.3
ATAD1	ENST00000308448.7	ATPase family, AAA domain containing 1	hsa-miR-199a-3p	Downregulated	-0.3
ADRB1	ENST00000369295.2	adrenoceptor beta 1	hsa-miR-199a-3p	Downregulated	-0.3
AEBP2	ENST00000266508.9	AE binding protein 2	hsa-miR-199a-3p	Downregulated	-0.3
MOGS	ENST00000409065.1	mannosyl-oligosaccharide glucosidase	hsa-miR-199a-3p	Downregulated	-0.3
CDK5R1	ENST00000313401.3	cyclin-dependent kinase 5, regulatory subunit 1 (p35)	hsa-miR-199a-3p	Downregulated	-0.3
NKX2-4	ENST00000351817.4	NK2 homeobox 4	hsa-miR-150-5p	Downregulated	-0.3
TEK	ENST00000380036.4	TEK tyrosine kinase, endothelial	hsa-miR-150-5p	Downregulated	-0.3
AIFM2	ENST00000307864.1	apoptosis-inducing factor, mitochondrion-associated, 2	hsa-miR-150-5p	Downregulated	-0.3
EGR2	ENST00000242480.3	early growth response 2	hsa-miR-150-5p	Downregulated	-0.3
GTF2A1	ENST00000553612.1	general transcription factor IIA, 1, 19/37kDa	hsa-miR-142-3p.1	Downregulated	-0.3
TEX2	ENST00000258991.3	testis expressed 2	hsa-miR-142-3p.1	Downregulated	-0.3
GNAQ	ENST00000286548.4	guanine nucleotide binding protein (G protein), q polypeptide	hsa-miR-142-3p.1	Downregulated	-0.3
BACH1	ENST00000286800.3	BTB and CNC homology 1, basic leucine zipper transcription factor 1	hsa-miR-142-3p.1	Downregulated	-0.3
ATG16L1	ENST00000392017.4	autophagy related 16-like 1 (S. cerevisiae)	hsa-miR-142-3p.1	Downregulated	-0.3
TRABD	ENST00000303434.4	TraB domain containing	hsa-miR-124-3p.1	Upregulated	-0.3
CTC-435M10.3	ENST00000540732.1	2-oxoisovalerate dehydrogenase subunit alpha, mitochondrial; Uncharacterized protein	hsa-miR-124-3p.1	Upregulated	-0.3
OVOL1	ENST00000335987.3	ovo-like 1(Drosophila)	hsa-miR-124-3p.1	Upregulated	-0.3
FAM174B	ENST00000327355.5	family with sequence similarity 174, member B	hsa-miR-124-3p.1	Upregulated	-0.3
SURF4	ENST00000545297.1	surfeit 4	hsa-miR-124-3p.1	Upregulated	-0.3
ZNF213	ENST00000396878.3	zinc finger protein 213	hsa-miR-124-3p.1	Upregulated	-0.3
RPS6KA4	ENST00000528057.1	ribosomal protein S6 kinase, 90kDa, polypeptide 4	hsa-miR-124-3p.1	Upregulated	-0.3
CLEC14A	ENST00000342213.2	C-type lectin domain family 14, member A	hsa-miR-124-3p.1	Upregulated	-0.3
UBXN1	ENST00000294119.2	UBX domain protein 1	hsa-miR-124-3p.1	Upregulated	-0.3
PPM1F	ENST00000263212.5	protein phosphatase, Mg2+/Mn2+ dependent, 1F	hsa-miR-124-3p.1	Upregulated	-0.3
CNOT11	ENST00000289382.3	CCR4-NOT transcription complex, subunit 11	hsa-miR-124-3p.1	Upregulated	-0.3
ZNF2	ENST00000398107.2	zinc finger protein 2	hsa-miR-124-3p.1	Upregulated	-0.3
SLITRK3	ENST00000475390.1	SLIT and NTRK-like family, member 3	hsa-miR-124-3p.1	Upregulated	-0.3
TJP2	ENST00000453658.2	tight junction protein 2	hsa-miR-124-3p.1	Upregulated	-0.3
MYH9	ENST00000216181.5	myosin, heavy chain 9, non-muscle	hsa-miR-124-3p.1	Upregulated	-0.3
UBXN2A	ENST00000309033.4	UBX domain protein 2A	hsa-miR-124-3p.1	Upregulated	-0.3
NYNRIN	ENST00000382554.3	NYN domain and retroviral integrase containing	hsa-miR-124-3p.1	Upregulated	-0.3
ARHGEF37	ENST00000333677.6	Rho guanine nucleotide exchange factor (GEF) 37	hsa-miR-124-3p.1	Upregulated	-0.3
TOM1	ENST00000382034.5	target of myb1 (chicken)	hsa-miR-124-3p.1	Upregulated	-0.3
ETS1	ENST00000531611.1	v-ets avian erythroblastosis virus E26 oncogene homolog 1	hsa-miR-124-3p.1	Upregulated	-0.3
PADI2	ENST00000375486.4	peptidyl arginine deiminase, type II	hsa-miR-124-3p.1	Upregulated	-0.3
YME1L1	ENST00000326799.3	YME1-like 1 ATPase	hsa-miR-124-3p.1	Upregulated	-0.3
KIF3A	ENST00000378746.4	kinesin family member 3A	hsa-miR-124-3p.1	Upregulated	-0.3
RBCK1	ENST00000356286.5	RanBP-type and C3HC4-type zinc finger containing 1	hsa-miR-124-3p.1	Upregulated	-0.3
PALM	ENST00000338448.5	paralemmin	hsa-miR-124-3p.1	Upregulated	-0.3
FGD5	ENST00000285046.5	FYVE, RhoGEF and PH domain containing 5	hsa-miR-124-3p.1	Upregulated	-0.3
THBS2	ENST00000366787.3	thrombospondin 2	hsa-miR-124-3p.1	Upregulated	-0.3
RPH3AL	ENST00000331302.7	rabphilin 3A-like (without C2 domains)	hsa-miR-124-3p.1	Upregulated	-0.3
CDH4	ENST00000360469.5	cadherin 4, type 1, R-cadherin (retinal)	hsa-miR-124-3p.1	Upregulated	-0.3
KCNN3	ENST00000271915.4	potassium intermediate/small conductance calcium-activated channel, subfamily N, member 3	hsa-miR-124-3p.1	Upregulated	-0.3
SLC9A2	ENST00000233969.2	solute carrier family 9, subfamily A (NHE2, cation proton antiporter 2), member 2	hsa-miR-124-3p.1	Upregulated	-0.3
FOSL2	ENST00000379619.1	FOS-like antigen 2	hsa-miR-124-3p.1	Upregulated	-0.3
CPD	ENST00000225719.4	carboxypeptidase D	hsa-miR-124-3p.1	Upregulated	-0.3
TMEM63C	ENST00000298351.4	transmembrane protein 63C	hsa-miR-124-3p.1	Upregulated	-0.3
SH3BP5L	ENST00000366472.5	SH3-binding domain protein 5-like	hsa-miR-124-3p.1	Upregulated	-0.3
RANBP10	ENST00000317506.3	RAN binding protein 10	hsa-miR-124-3p.1	Upregulated	-0.3
CNN3	ENST00000370206.4	calponin 3, acidic	hsa-miR-124-3p.1	Upregulated	-0.3
GPD2	ENST00000540309.1	glycerol-3-phosphate dehydrogenase 2 (mitochondrial)	hsa-miR-124-3p.1	Upregulated	-0.3
TMEM257	ENST00000408967.2	transmembrane protein 257	hsa-miR-129-1-3p	Upregulated	-0.3
STX6	ENST00000258301.5	syntaxin 6	hsa-miR-129-1-3p	Upregulated	-0.3
RAP1B	ENST00000250559.9	RAP1B, member of RAS oncogene family	hsa-miR-129-1-3p	Upregulated	-0.3
MCU	ENST00000373053.3	mitochondrial calcium uniporter	hsa-miR-129-1-3p	Upregulated	-0.3
ANKRD52	ENST00000267116.7	ankyrin repeat domain 52	hsa-miR-129-2-3p	Upregulated	-0.3
PELI2	ENST00000267460.4	pellino E3 ubiquitin protein ligase family member 2	hsa-miR-129-2-3p	Upregulated	-0.3
TBC1D22B	ENST00000373491.3	TBC1 domain family, member 22B	hsa-miR-129-2-3p	Upregulated	-0.3
CNTN2	ENST00000331830.4	contactin 2 (axonal)	hsa-miR-129-1-3p	Upregulated	-0.3
CACFD1	ENST00000291722.7	calcium channel flower domain containing 1	hsa-miR-129-1-3p	Upregulated	-0.3
NLN	ENST00000380985.5	neurolysin (metallopeptidase M3 family)	hsa-miR-129-2-3p	Upregulated	-0.3
WEE1	ENST00000299613.6	WEE1 homolog (S. pombe)	hsa-miR-129-1-3p	Upregulated	-0.3
ELOVL1	ENST00000372458.3	ELOVL fatty acid elongase 1	hsa-miR-129-1-3p	Upregulated	-0.3
CCNT1	ENST00000261900.3	cyclin T1	hsa-miR-129-1-3p	Upregulated	-0.3
FUT9	ENST00000302103.5	fucosyltransferase 9 (alpha (1,3) fucosyltransferase)	hsa-miR-129-1-3p	Upregulated	-0.3
TRAF4	ENST00000262395.5	TNF receptor-associated factor 4	hsa-miR-129-2-3p	Upregulated	-0.3
BMPER	ENST00000297161.2	BMP binding endothelial regulator	hsa-miR-129-1-3p	Upregulated	-0.3
UBE2Z	ENST00000360943.5	ubiquitin-conjugating enzyme E2Z	hsa-miR-9-5p	Upregulated	-0.3
PARG	ENST00000402038.3	poly (ADP-ribose) glycohydrolase	hsa-miR-9-5p	Upregulated	-0.3
TMEM87B	ENST00000283206.4	transmembrane protein 87B	hsa-miR-9-5p	Upregulated	-0.3
MAP7	ENST00000354570.3	microtubule-associated protein 7	hsa-miR-9-5p	Upregulated	-0.3
KCNK4	ENST00000394525.2	potassium channel, subfamily K, member 4	hsa-miR-9-5p	Upregulated	-0.3
TIMM23	ENST00000260867.4	translocase of inner mitochondrial membrane 23 homolog (yeast)	hsa-miR-9-5p	Upregulated	-0.3
CRYBG3	ENST00000389622.2	beta-gamma crystallin domain containing 3	hsa-miR-9-5p	Upregulated	-0.3
SNX25	ENST00000504273.1	sorting nexin 25	hsa-miR-9-5p	Upregulated	-0.3
GZF1	ENST00000338121.5	GDNF-inducible zinc finger protein 1	hsa-miR-9-5p	Upregulated	-0.3
SASS6	ENST00000287482.5	spindle assembly 6 homolog (C. elegans)	hsa-miR-9-5p	Upregulated	-0.3
FAM19A4	ENST00000295569.7	family with sequence similarity 19 (chemokine (C-C motif)-like), member A4	hsa-miR-9-5p	Upregulated	-0.3
THOC5	ENST00000490103.1	THO complex 5	hsa-miR-9-5p	Upregulated	-0.3
UHMK1	ENST00000538489.1	U2AF homology motif (UHM) kinase 1	hsa-miR-9-5p	Upregulated	-0.3
AUH	ENST00000375731.4	AU RNA binding protein/enoyl-CoA hydratase	hsa-miR-9-5p	Upregulated	-0.3
SMAP2	ENST00000539317.1	small ArfGAP2	hsa-miR-9-5p	Upregulated	-0.3
CCDC144A	ENST00000443444.2	coiled-coil domain containing 144A	hsa-miR-9-5p	Upregulated	-0.3
DTD1	ENST00000377452.3	D-tyrosyl-tRNA deacylase 1	hsa-miR-9-5p	Upregulated	-0.3
C10orf118	ENST00000543782.1	chromosome 10 open reading frame 118	hsa-miR-9-5p	Upregulated	-0.3
KLHL1	ENST00000377844.4	kelch-like family member 1	hsa-miR-9-5p	Upregulated	-0.3
COL9A1	ENST00000357250.6	collagen, type IX, alpha 1	hsa-miR-9-5p	Upregulated	-0.3
ITPRIPL2	ENST00000381440.3	inositol 1,4,5-trisphosphate receptor interacting protein-like 2	hsa-miR-9-5p	Upregulated	-0.3
GJA3	ENST00000241125.3	gap junction protein, alpha 3, 46kDa	hsa-miR-9-5p	Upregulated	-0.3
BRWD1	ENST00000342449.3	bromodomain and WD repeat domain containing 1	hsa-miR-219a-2-3p	Upregulated	-0.3
FAM91A1	ENST00000334705.7	family with sequence similarity 91, member A1	hsa-miR-219a-5p	Upregulated	-0.3
SLC16A6	ENST00000327268.4	solute carrier family 16, member 6	hsa-miR-219a-5p	Upregulated	-0.3
THRB	ENST00000396671.2	thyroid hormone receptor, beta	hsa-miR-219a-5p	Upregulated	-0.3
UBE3A	ENST00000232165.3	ubiquitin protein ligase E3A	hsa-miR-219a-5p	Upregulated	-0.3
MOB4	ENST00000233892.4	MOB family member 4, phocein	hsa-miR-219a-5p	Upregulated	-0.3
POU2F1	ENST00000367866.2	POU class 2 homeobox 1	hsa-miR-219a-5p	Upregulated	-0.3
FGF9	ENST00000382353.5	fibroblast growth factor 9	hsa-miR-219a-5p	Upregulated	-0.3
TOX3	ENST00000407228.3	TOX high mobility group box family member 3	hsa-miR-199b-5p	Downregulated	-0.29
APMAP	ENST00000447138.1	adipocyte plasma membrane associated protein	hsa-miR-199b-5p	Downregulated	-0.29
STK4	ENST00000372801.1	serine/threonine kinase 4	hsa-miR-199b-5p	Downregulated	-0.29
FKBP5	ENST00000536438.1	FK506 binding protein 5	hsa-miR-199a-5p	Downregulated	-0.29
TMED8	ENST00000216468.7	transmembrane emp24 protein transport domain containing 8	hsa-miR-199a-5p	Downregulated	-0.29
GPR180	ENST00000376958.4	G protein-coupled receptor 180	hsa-miR-199a-5p	Downregulated	-0.29
EMC10	ENST00000376918.3	ER membrane protein complex subunit 10	hsa-miR-199a-5p	Downregulated	-0.29
SIRT1	ENST00000212015.6	sirtuin 1	hsa-miR-199a-5p	Downregulated	-0.29
MARK4	ENST00000300843.4	MAP/microtubule affinity-regulating kinase 4	hsa-miR-199a-5p	Downregulated	-0.29
KLHL29	ENST00000486442.1	kelch-like family member 29	hsa-miR-199b-5p	Downregulated	-0.29
SUCO	ENST00000367723.4	SUN domain containing ossification factor	hsa-miR-199a-5p	Downregulated	-0.29
FRY	ENST00000380250.3	furry homolog (Drosophila)	hsa-miR-199a-3p	Downregulated	-0.29
ZNF217	ENST00000371471.2	zinc finger protein 217	hsa-miR-199a-3p	Downregulated	-0.29
PDE4B	ENST00000371045.5	phosphodiesterase 4B, cAMP-specific	hsa-miR-199a-3p	Downregulated	-0.29
RBM47	ENST00000319592.4	RNA binding motif protein 47	hsa-miR-199a-3p	Downregulated	-0.29
ZHX2	ENST00000314393.4	zinc fingers and homeoboxes 2	hsa-miR-199a-3p	Downregulated	-0.29
RPAP3	ENST00000005386.3	RNA polymerase II associated protein 3	hsa-miR-199a-3p	Downregulated	-0.29
PSD2	ENST00000274710.3	pleckstrin and Sec7 domain containing 2	hsa-miR-199a-3p	Downregulated	-0.29
ARHGEF3	ENST00000296315.3	Rho guanine nucleotide exchange factor (GEF) 3	hsa-miR-199a-3p	Downregulated	-0.29
TRA2B	ENST00000453386.2	transformer 2 beta homolog (Drosophila)	hsa-miR-199a-3p	Downregulated	-0.29
FAM133A	ENST00000538690.1	family with sequence similarity 133, member A	hsa-miR-199a-3p	Downregulated	-0.29
TUBGCP3	ENST00000261965.3	tubulin, gamma complex associated protein 3	hsa-miR-199a-3p	Downregulated	-0.29
DCBLD2	ENST00000326840.6	discoidin, CUB and LCCL domain containing 2	hsa-miR-199a-3p	Downregulated	-0.29
MBNL1	ENST00000357472.3	muscleblind-like splicing regulator 1	hsa-miR-199a-3p	Downregulated	-0.29
STIM2	ENST00000467011.1	stromal interaction molecule 2	hsa-miR-199a-3p	Downregulated	-0.29
LRRC58	ENST00000295628.3	leucine rich repeat containing 58	hsa-miR-150-5p	Downregulated	-0.29
NR2F2	ENST00000394166.3	nuclear receptor subfamily 2, group F, member 2	hsa-miR-150-5p	Downregulated	-0.29
PTP4A1	ENST00000370651.3	protein tyrosine phosphatase type IVA, member 1	hsa-miR-150-5p	Downregulated	-0.29
ACTRT3	ENST00000330368.2	actin-related protein T3	hsa-miR-150-5p	Downregulated	-0.29
HSP90B1	ENST00000299767.5	heat shock protein 90kDa beta (Grp94), member 1	hsa-miR-150-5p	Downregulated	-0.29
ARID5B	ENST00000279873.7	AT rich interactive domain 5B (MRF1-like)	hsa-miR-142-3p.1	Downregulated	-0.29
TMEM115	ENST00000266025.3	transmembrane protein 115	hsa-miR-142-3p.1	Downregulated	-0.29
GOLGA1	ENST00000373555.4	golgin A1	hsa-miR-142-3p.1	Downregulated	-0.29
SNX18	ENST00000343017.6	sorting nexin 18	hsa-miR-142-3p.1	Downregulated	-0.29
AFF2	ENST00000370460.2	AF4/FMR2 family, member 2	hsa-miR-142-3p.1	Downregulated	-0.29
HMGB1	ENST00000399489.1	high mobility group box 1	hsa-miR-142-3p.1	Downregulated	-0.29
ATP2A2	ENST00000395494.2	ATPase, Ca++ transporting, cardiac muscle, slow twitch 2	hsa-miR-142-3p.1	Downregulated	-0.29
PAPD7	ENST00000230859.6	PAP associated domain containing 7	hsa-miR-142-3p.1	Downregulated	-0.29
SH2B1	ENST00000359285.5	SH2B adaptor protein 1	hsa-miR-142-3p.1	Downregulated	-0.29
NR3C2	ENST00000344721.4	nuclear receptor subfamily 3, group C, member 2	hsa-miR-124-3p.1	Upregulated	-0.29
REEP2	ENST00000254901.5	receptor accessory protein 2	hsa-miR-124-3p.1	Upregulated	-0.29
TMEM117	ENST00000551577.1	transmembrane protein 117	hsa-miR-124-3p.1	Upregulated	-0.29
SLC18A2	ENST00000298472.5	solute carrier family 18 (vesicular monoamine transporter), member 2	hsa-miR-124-3p.1	Upregulated	-0.29
ITPR3	ENST00000374316.5	inositol 1,4,5-trisphosphate receptor, type 3	hsa-miR-124-3p.1	Upregulated	-0.29
ANTXR2	ENST00000403729.2	anthrax toxin receptor 2	hsa-miR-124-3p.1	Upregulated	-0.29
ZFP36L2	ENST00000282388.3	ZFP36 ring finger protein-like 2	hsa-miR-124-3p.1	Upregulated	-0.29
JAM2	ENST00000480456.1	junctional adhesion molecule 2	hsa-miR-124-3p.1	Upregulated	-0.29
MTMR10	ENST00000435680.1	myotubularin related protein 10	hsa-miR-124-3p.1	Upregulated	-0.29
PLCXD3	ENST00000377801.3	phosphatidylinositol-specific phospholipase C, X domain containing 3	hsa-miR-124-3p.1	Upregulated	-0.29
ROCK1	ENST00000399799.2	Rho-associated, coiled-coil containing protein kinase 1	hsa-miR-124-3p.1	Upregulated	-0.29
RBL1	ENST00000373664.3	retinoblastoma-like 1 (p107)	hsa-miR-124-3p.1	Upregulated	-0.29
FAM81A	ENST00000288228.5	family with sequence similarity 81, member A	hsa-miR-124-3p.1	Upregulated	-0.29
MCF2	ENST00000520602.1	MCF.2 cell line derived transforming sequence	hsa-miR-124-3p.1	Upregulated	-0.29
FAM76A	ENST00000373954.6	family with sequence similarity 76, member A	hsa-miR-124-3p.1	Upregulated	-0.29
MEF2A	ENST00000354410.5	myocyte enhancer factor 2A	hsa-miR-124-3p.1	Upregulated	-0.29
TMEM184B	ENST00000361906.3	transmembrane protein 184B	hsa-miR-124-3p.1	Upregulated	-0.29
ARL10	ENST00000310389.5	ADP-ribosylation factor-like 10	hsa-miR-124-3p.1	Upregulated	-0.29
MYO5B	ENST00000285039.7	myosin VB	hsa-miR-124-3p.1	Upregulated	-0.29
NFIA	ENST00000403491.3	nuclear factor I/A	hsa-miR-124-3p.1	Upregulated	-0.29
FURIN	ENST00000268171.3	furin (paired basic amino acid cleaving enzyme)	hsa-miR-124-3p.1	Upregulated	-0.29
GABRQ	ENST00000370306.2	gamma-aminobutyric acid (GABA) A receptor, theta	hsa-miR-124-3p.1	Upregulated	-0.29
GCNT4	ENST00000322348.4	glucosaminyl (N-acetyl) transferase 4, core 2	hsa-miR-124-3p.1	Upregulated	-0.29
MYO1E	ENST00000288235.4	myosin IE	hsa-miR-124-3p.1	Upregulated	-0.29
AMOT	ENST00000304758.1	angiomotin	hsa-miR-124-3p.1	Upregulated	-0.29
NRAS	ENST00000369535.4	neuroblastoma RAS viral (v-ras) oncogene homolog	hsa-miR-124-3p.1	Upregulated	-0.29
TWSG1	ENST00000262120.5	twisted gastrulation BMP signaling modulator 1	hsa-miR-124-3p.1	Upregulated	-0.29
SPECC1L	ENST00000314328.9	sperm antigen with calponin homology and coiled-coil domains 1-like	hsa-miR-124-3p.1	Upregulated	-0.29
TPCN2	ENST00000294309.3	two pore segment channel 2	hsa-miR-124-3p.1	Upregulated	-0.29
CDH9	ENST00000231021.4	cadherin 9, type 2 (T1-cadherin)	hsa-miR-124-3p.1	Upregulated	-0.29
LIX1	ENST00000274382.4	Lix1 homolog (chicken)	hsa-miR-124-3p.1	Upregulated	-0.29
PUS7	ENST00000356362.2	pseudouridylate synthase 7 homolog (S. cerevisiae)	hsa-miR-124-3p.1	Upregulated	-0.29
DDX3Y	ENST00000336079.3	DEAD (Asp-Glu-Ala-Asp) box helicase 3, Y-linked	hsa-miR-124-3p.1	Upregulated	-0.29
SPOCK3	ENST00000357154.3	sparc/osteonectin, cwcv and kazal-like domains proteoglycan (testican) 3	hsa-miR-124-3p.1	Upregulated	-0.29
CACUL1	ENST00000369151.3	CDK2-associated, cullin domain 1	hsa-miR-124-3p.1	Upregulated	-0.29
SLC39A9	ENST00000031146.4	solute carrier family 39, member 9	hsa-miR-124-3p.1	Upregulated	-0.29
DEDD2	ENST00000336034.4	death effector domain containing 2	hsa-miR-129-1-3p	Upregulated	-0.29
HECTD1	ENST00000553700.1	HECT domain containing E3 ubiquitin protein ligase 1	hsa-miR-129-1-3p	Upregulated	-0.29
FBXO36	ENST00000373652.3	F-box protein 36	hsa-miR-129-1-3p	Upregulated	-0.29
GPC1	ENST00000264039.2	glypican 1	hsa-miR-129-1-3p	Upregulated	-0.29
FAM117B	ENST00000392238.2	family with sequence similarity 117, member B	hsa-miR-129-1-3p	Upregulated	-0.29
TMEM2	ENST00000377044.4	transmembrane protein 2	hsa-miR-129-1-3p	Upregulated	-0.29
ZDHHC20	ENST00000320220.9	zinc finger, DHHC-type containing 20	hsa-miR-129-1-3p	Upregulated	-0.29
SMUG1	ENST00000505128.1	single-strand-selective monofunctional uracil-DNA glycosylase 1	hsa-miR-129-2-3p	Upregulated	-0.29
DNAJC14	ENST00000357606.3	DnaJ (Hsp40) homolog, subfamily C, member 14	hsa-miR-129-2-3p	Upregulated	-0.29
ETV5	ENST00000306376.5	ets variant 5	hsa-miR-129-1-3p	Upregulated	-0.29
EPHB2	ENST00000374632.3	EPH receptor B2	hsa-miR-129-2-3p	Upregulated	-0.29
VAV3	ENST00000370056.4	vav 3 guanine nucleotide exchange factor	hsa-miR-129-1-3p	Upregulated	-0.29
ZBTB20	ENST00000462705.1	zinc finger and BTB domain containing 20	hsa-miR-129-1-3p	Upregulated	-0.29
TGFBR2	ENST00000359013.4	transforming growth factor, beta receptor II (70/80kDa)	hsa-miR-9-5p	Upregulated	-0.29
GLTSCR1L	ENST00000314073.5	GLTSCR1-like	hsa-miR-9-5p	Upregulated	-0.29
CNTFR	ENST00000351266.4	ciliary neurotrophic factor receptor	hsa-miR-9-5p	Upregulated	-0.29
JDP2	ENST00000435893.2	Jun dimerization protein 2	hsa-miR-9-5p	Upregulated	-0.29
HOXA11	ENST00000006015.3	homeobox A11	hsa-miR-9-5p	Upregulated	-0.29
MYO1C	ENST00000359786.5	myosin IC	hsa-miR-9-5p	Upregulated	-0.29
TSC22D2	ENST00000361875.3	TSC22 domain family, member 2	hsa-miR-9-5p	Upregulated	-0.29
SRSF10	ENST00000343255.5	serine/arginine-rich splicing factor 10	hsa-miR-9-5p	Upregulated	-0.29
SYAP1	ENST00000380155.3	synapse associated protein 1	hsa-miR-9-5p	Upregulated	-0.29
RNF111	ENST00000348370.4	ring finger protein 111	hsa-miR-9-5p	Upregulated	-0.29
SLC25A24	ENST00000565488.1	solute carrier family 25 (mitochondrial carrier; phosphate carrier), member 24	hsa-miR-9-5p	Upregulated	-0.29
PDZK1	ENST00000344770.2	PDZ domain containing 1	hsa-miR-9-5p	Upregulated	-0.29
ZNF394	ENST00000426306.2	zinc finger protein 394	hsa-miR-9-5p	Upregulated	-0.29
FREM2	ENST00000280481.7	FRAS1 related extracellular matrix protein 2	hsa-miR-9-5p	Upregulated	-0.29
ARHGAP24	ENST00000395184.1	Rho GTPase activating protein 24	hsa-miR-9-5p	Upregulated	-0.29
ANKRD13A	ENST00000261739.4	ankyrin repeat domain 13A	hsa-miR-9-5p	Upregulated	-0.29
ZBTB39	ENST00000300101.2	zinc finger and BTB domain containing 39	hsa-miR-9-5p	Upregulated	-0.29
RNF19A	ENST00000519449.1	ring finger protein 19A, RBR E3 ubiquitin protein ligase	hsa-miR-9-5p	Upregulated	-0.29
SNIP1	ENST00000296215.6	Smad nuclear interacting protein 1	hsa-miR-9-5p	Upregulated	-0.29
RP2	ENST00000218340.3	retinitis pigmentosa 2 (X-linked recessive)	hsa-miR-9-5p	Upregulated	-0.29
FBXL2	ENST00000484457.1	F-box and leucine-rich repeat protein 2	hsa-miR-9-5p	Upregulated	-0.29
ERG	ENST00000398905.1	v-ets avian erythroblastosis virus E26 oncogene homolog	hsa-miR-9-5p	Upregulated	-0.29
MAP3K3	ENST00000361357.3	mitogen-activated protein kinase kinase kinase 3	hsa-miR-9-5p	Upregulated	-0.29
ATXN3	ENST00000545170.1	ataxin 3	hsa-miR-219a-2-3p	Upregulated	-0.29
PPARGC1A	ENST00000264867.2	peroxisome proliferator-activated receptor gamma, coactivator 1 alpha	hsa-miR-219a-5p	Upregulated	-0.29
PALM2	ENST00000448454.2	paralemmin 2	hsa-miR-219a-5p	Upregulated	-0.29
CLOCK	ENST00000309964.4	clock circadian regulator	hsa-miR-219a-5p	Upregulated	-0.29
PHF19	ENST00000373896.3	PHD finger protein 19	hsa-miR-219a-5p	Upregulated	-0.29
SLC30A4	ENST00000261867.4	solute carrier family 30 (zinc transporter), member 4	hsa-miR-219a-5p	Upregulated	-0.29
OCRL	ENST00000371113.4	oculocerebrorenal syndrome of Lowe	hsa-miR-219a-5p	Upregulated	-0.29
GPRC5B	ENST00000300571.2	G protein-coupled receptor, family C, group 5, member B	hsa-miR-219a-5p	Upregulated	-0.29
PDGFRA	ENST00000257290.5	platelet-derived growth factor receptor, alpha polypeptide	hsa-miR-219a-5p	Upregulated	-0.29
ASAH2B	ENST00000374007.1	N-acylsphingosine amidohydrolase (non-lysosomal ceramidase) 2B	hsa-miR-219a-5p	Upregulated	-0.29
RIMS1	ENST00000348717.5	regulating synaptic membrane exocytosis 1	hsa-miR-219a-5p	Upregulated	-0.29
ASH1L	ENST00000368346.3	ash1 (absent, small, or homeotic)-like (Drosophila)	hsa-miR-219a-5p	Upregulated	-0.29
UBE2Z	ENST00000360943.5	ubiquitin-conjugating enzyme E2Z	hsa-miR-219a-5p	Upregulated	-0.29
FSTL4	ENST00000265342.7	follistatin-like 4	hsa-miR-199a-5p	Downregulated	-0.28
BEND3	ENST00000369042.1	BEN domain containing 3	hsa-miR-199a-5p	Downregulated	-0.28
ZNF652	ENST00000362063.2	zinc finger protein 652	hsa-miR-199a-5p	Downregulated	-0.28
MIER3	ENST00000381226.3	mesoderm induction early response 1, family member 3	hsa-miR-199b-5p	Downregulated	-0.28
ADD3	ENST00000277900.8	adducin 3 (gamma)	hsa-miR-199a-5p	Downregulated	-0.28
EMC7	ENST00000256545.4	ER membrane protein complex subunit 7	hsa-miR-199a-5p	Downregulated	-0.28
CELF2	ENST00000379261.4	CUGBP, Elav-like family member 2	hsa-miR-199a-5p	Downregulated	-0.28
NFIL3	ENST00000297689.3	nuclear factor, interleukin 3 regulated	hsa-miR-199a-5p	Downregulated	-0.28
GOSR1	ENST00000225724.5	golgi SNAP receptor complex member 1	hsa-miR-199a-5p	Downregulated	-0.28
ZNF667	ENST00000591790.1	zinc finger protein 667	hsa-miR-199a-5p	Downregulated	-0.28
PARP12	ENST00000263549.3	poly (ADP-ribose) polymerase family, member 12	hsa-miR-199b-5p	Downregulated	-0.28
WDR47	ENST00000400794.3	WD repeat domain 47	hsa-miR-199a-3p	Downregulated	-0.28
SLC33A1	ENST00000392845.3	solute carrier family 33 (acetyl-CoA transporter), member 1	hsa-miR-199a-3p	Downregulated	-0.28
ITGA3	ENST00000007722.7	integrin, alpha 3 (antigen CD49C, alpha 3 subunit of VLA-3 receptor)	hsa-miR-199a-3p	Downregulated	-0.28
TXLNG	ENST00000380122.5	taxilin gamma	hsa-miR-199a-3p	Downregulated	-0.28
FAM49B	ENST00000519824.2	family with sequence similarity 49, member B	hsa-miR-199a-3p	Downregulated	-0.28
CABLES1	ENST00000256925.7	Cdk5 and Abl enzyme substrate 1	hsa-miR-199a-3p	Downregulated	-0.28
PTPRU	ENST00000428026.2	protein tyrosine phosphatase, receptor type, U	hsa-miR-199a-3p	Downregulated	-0.28
CD44	ENST00000278386.6	CD44 molecule (Indian blood group)	hsa-miR-199a-3p	Downregulated	-0.28
SP1	ENST00000426431.2	Sp1 transcription factor	hsa-miR-199a-3p	Downregulated	-0.28
PIGG	ENST00000296306.7	phosphatidylinositol glycan anchor biosynthesis, class G	hsa-miR-150-5p	Downregulated	-0.28
KCNIP1	ENST00000328939.4	Kv channel interacting protein 1	hsa-miR-150-5p	Downregulated	-0.28
PLEKHA3	ENST00000234453.5	pleckstrin homology domain containing, family A (phosphoinositide binding specific) member 3	hsa-miR-142-3p.1	Downregulated	-0.28
ROCK2	ENST00000315872.6	Rho-associated, coiled-coil containing protein kinase 2	hsa-miR-142-3p.1	Downregulated	-0.28
SLCO4C1	ENST00000310954.6	solute carrier organic anion transporter family, member 4C1	hsa-miR-142-3p.1	Downregulated	-0.28
ASB7	ENST00000332783.7	ankyrin repeat and SOCS box containing 7	hsa-miR-142-3p.1	Downregulated	-0.28
RAB1A	ENST00000409892.1	RAB1A, member RAS oncogene family	hsa-miR-142-3p.1	Downregulated	-0.28
TMEM55B	ENST00000250489.4	transmembrane protein 55B	hsa-miR-142-3p.1	Downregulated	-0.28
ZNF395	ENST00000344423.5	zinc finger protein 395	hsa-miR-142-3p.1	Downregulated	-0.28
ERC1	ENST00000355446.5	ELKS/RAB6-interacting/CAST family member 1	hsa-miR-142-3p.1	Downregulated	-0.28
TAGAP	ENST00000367066.3	T-cell activation RhoGTPase activating protein	hsa-miR-142-3p.1	Downregulated	-0.28
SLC6A11	ENST00000254488.2	solute carrier family 6 (neurotransmitter transporter), member 11	hsa-miR-142-3p.1	Downregulated	-0.28
SERP1	ENST00000239944.2	stress-associated endoplasmic reticulum protein 1	hsa-miR-142-3p.1	Downregulated	-0.28
TNKS	ENST00000310430.6	tankyrase, TRF1-interacting ankyrin-related ADP-ribose polymerase	hsa-miR-142-3p.1	Downregulated	-0.28
NSF	ENST00000225282.8	N-ethylmaleimide-sensitive factor	hsa-miR-142-3p.1	Downregulated	-0.28
MTMR9	ENST00000221086.3	myotubularin related protein 9	hsa-miR-142-3p.1	Downregulated	-0.28
ZNF831	ENST00000371030.2	zinc finger protein 831	hsa-miR-142-3p.1	Downregulated	-0.28
RBM47	ENST00000319592.4	RNA binding motif protein 47	hsa-miR-142-3p.1	Downregulated	-0.28
SEMA5A	ENST00000382496.5	sema domain, seven thrombospondin repeats (type 1 and type 1-like), transmembrane domain (TM) and short cytoplasmic domain, (semaphorin) 5A	hsa-miR-124-3p.1	Upregulated	-0.28
KIAA2013	ENST00000376572.3	KIAA2013	hsa-miR-124-3p.1	Upregulated	-0.28
MKX	ENST00000375790.5	mohawk homeobox	hsa-miR-124-3p.1	Upregulated	-0.28
TMEM260	ENST00000261556.6	transmembrane protein 260	hsa-miR-124-3p.1	Upregulated	-0.28
TMEM26	ENST00000399298.3	transmembrane protein 26	hsa-miR-124-3p.1	Upregulated	-0.28
NARG2	ENST00000261520.4	NMDA receptor regulated 2	hsa-miR-124-3p.1	Upregulated	-0.28
EPHA2	ENST00000358432.5	EPH receptor A2	hsa-miR-124-3p.1	Upregulated	-0.28
AGBL4	ENST00000371839.1	ATP/GTP binding protein-like 4	hsa-miR-124-3p.1	Upregulated	-0.28
ITPKB	ENST00000272117.3	inositol-trisphosphate 3-kinase B	hsa-miR-124-3p.1	Upregulated	-0.28
FOXN1	ENST00000226247.2	forkhead box N1	hsa-miR-124-3p.1	Upregulated	-0.28
EIF4EBP2	ENST00000373218.4	eukaryotic translation initiation factor 4E binding protein 2	hsa-miR-124-3p.1	Upregulated	-0.28
TCF3	ENST00000262965.5	transcription factor 3	hsa-miR-124-3p.1	Upregulated	-0.28
NCOA4	ENST00000452682.1	nuclear receptor coactivator 4	hsa-miR-124-3p.1	Upregulated	-0.28
NXT2	ENST00000372106.1	nuclear transport factor 2-like export factor 2	hsa-miR-124-3p.1	Upregulated	-0.28
NAP1L5	ENST00000323061.5	nucleosome assembly protein 1-like 5	hsa-miR-124-3p.1	Upregulated	-0.28
POC1B	ENST00000378528.2	POC1 centriolar protein B	hsa-miR-124-3p.1	Upregulated	-0.28
VPS4B	ENST00000238497.5	vacuolar protein sorting 4 homolog B (S. cerevisiae)	hsa-miR-124-3p.1	Upregulated	-0.28
CRAT	ENST00000318080.2	carnitine O-acetyltransferase	hsa-miR-124-3p.1	Upregulated	-0.28
NRP2	ENST00000360409.3	neuropilin 2	hsa-miR-124-3p.1	Upregulated	-0.28
TPST2	ENST00000338754.4	tyrosylprotein sulfotransferase 2	hsa-miR-124-3p.1	Upregulated	-0.28
AXIN1	ENST00000262320.3	axin 1	hsa-miR-124-3p.1	Upregulated	-0.28
IPO8	ENST00000256079.4	importin 8	hsa-miR-124-3p.1	Upregulated	-0.28
SGPL1	ENST00000373202.3	sphingosine-1-phosphate lyase 1	hsa-miR-124-3p.1	Upregulated	-0.28
ATF7IP	ENST00000261168.4	activating transcription factor 7 interacting protein	hsa-miR-124-3p.1	Upregulated	-0.28
MYADM	ENST00000391770.4	myeloid-associated differentiation marker	hsa-miR-124-3p.1	Upregulated	-0.28
NUMA1	ENST00000351960.6	nuclear mitotic apparatus protein 1	hsa-miR-124-3p.1	Upregulated	-0.28
PIK3IP1	ENST00000441972.1	phosphoinositide-3-kinase interacting protein 1	hsa-miR-124-3p.1	Upregulated	-0.28
GALNT12	ENST00000375011.3	UDP-N-acetyl-alpha-D-galactosamine:polypeptide N-acetylgalactosaminyltransferase 12 (GalNAc-T12)	hsa-miR-124-3p.1	Upregulated	-0.28
STX2	ENST00000392373.2	syntaxin 2	hsa-miR-124-3p.1	Upregulated	-0.28
SLC12A9	ENST00000354161.3	solute carrier family 12, member 9	hsa-miR-124-3p.1	Upregulated	-0.28
ATCAY	ENST00000450849.2	ataxia, cerebellar, Cayman type	hsa-miR-124-3p.1	Upregulated	-0.28
GRASP	ENST00000552049.1	GRP1 (general receptor for phosphoinositides 1)-associated scaffold protein	hsa-miR-124-3p.1	Upregulated	-0.28
ZNHIT6	ENST00000431532.2	zinc finger, HIT-type containing 6	hsa-miR-124-3p.1	Upregulated	-0.28
C1GALT1	ENST00000223122.3	core 1 synthase, glycoprotein-N-acetylgalactosamine 3-beta-galactosyltransferase, 1	hsa-miR-124-3p.1	Upregulated	-0.28
SH2B3	ENST00000341259.2	SH2B adaptor protein 3	hsa-miR-124-3p.1	Upregulated	-0.28
ZNF784	ENST00000591479.1	zinc finger protein 784	hsa-miR-124-3p.1	Upregulated	-0.28
UBE2G1	ENST00000396981.2	ubiquitin-conjugating enzyme E2G 1	hsa-miR-124-3p.1	Upregulated	-0.28
MYH11	ENST00000452625.2	myosin, heavy chain 11, smooth muscle	hsa-miR-124-3p.1	Upregulated	-0.28
NXN	ENST00000575801.1	nucleoredoxin	hsa-miR-124-3p.1	Upregulated	-0.28
KIAA0947	ENST00000296564.7	KIAA0947	hsa-miR-124-3p.1	Upregulated	-0.28
PML	ENST00000565898.1	promyelocytic leukemia	hsa-miR-124-3p.1	Upregulated	-0.28
PTPRQ	ENST00000266688.5	protein tyrosine phosphatase, receptor type, Q	hsa-miR-124-3p.1	Upregulated	-0.28
ZNF275	ENST00000370251.3	zinc finger protein 275	hsa-miR-124-3p.1	Upregulated	-0.28
IPCEF1	ENST00000265198.4	interaction protein for cytohesin exchange factors 1	hsa-miR-124-3p.1	Upregulated	-0.28
CALCOCO1	ENST00000548263.1	calcium binding and coiled-coil domain 1	hsa-miR-124-3p.1	Upregulated	-0.28
SP7	ENST00000536324.2	Sp7 transcription factor	hsa-miR-124-3p.1	Upregulated	-0.28
DLL4	ENST00000249749.5	delta-like 4 (Drosophila)	hsa-miR-124-3p.1	Upregulated	-0.28
FBXL4	ENST00000369244.2	F-box and leucine-rich repeat protein 4	hsa-miR-124-3p.1	Upregulated	-0.28
PPP1R3B	ENST00000310455.3	protein phosphatase 1, regulatory subunit 3B	hsa-miR-124-3p.1	Upregulated	-0.28
SREK1	ENST00000334121.6	splicing regulatory glutamine/lysine-rich protein 1	hsa-miR-124-3p.1	Upregulated	-0.28
ADAM19	ENST00000257527.4	ADAM metallopeptidase domain 19	hsa-miR-124-3p.1	Upregulated	-0.28
ITFG3	ENST00000399932.3	integrin alpha FG-GAP repeat containing 3	hsa-miR-124-3p.1	Upregulated	-0.28
SLCO5A1	ENST00000260126.4	solute carrier organic anion transporter family, member 5A1	hsa-miR-124-3p.1	Upregulated	-0.28
RNF34	ENST00000361234.5	ring finger protein 34, E3 ubiquitin protein ligase	hsa-miR-129-2-3p	Upregulated	-0.28
TGM6	ENST00000381423.1	transglutaminase 6	hsa-miR-129-1-3p	Upregulated	-0.28
EGLN1	ENST00000366641.3	egl-9 family hypoxia-inducible factor 1	hsa-miR-129-1-3p	Upregulated	-0.28
PREP	ENST00000369110.3	prolyl endopeptidase	hsa-miR-129-1-3p	Upregulated	-0.28
LRP6	ENST00000261349.4	low density lipoprotein receptor-related protein 6	hsa-miR-129-1-3p	Upregulated	-0.28
INO80	ENST00000361937.3	INO80 complex subunit	hsa-miR-129-1-3p	Upregulated	-0.28
CCNJ	ENST00000265992.5	cyclin J	hsa-miR-129-1-3p	Upregulated	-0.28
FUT8	ENST00000360689.5	fucosyltransferase 8 (alpha (1,6) fucosyltransferase)	hsa-miR-129-1-3p	Upregulated	-0.28
EIF3J	ENST00000261868.5	eukaryotic translation initiation factor 3, subunit J	hsa-miR-129-1-3p	Upregulated	-0.28
SLC4A4	ENST00000340595.3	solute carrier family 4 (sodium bicarbonate cotransporter), member 4	hsa-miR-129-1-3p	Upregulated	-0.28
GPD1L	ENST00000282541.5	glycerol-3-phosphate dehydrogenase 1-like	hsa-miR-129-1-3p	Upregulated	-0.28
GSE1	ENST00000253458.7	Gse1 coiled-coil protein	hsa-miR-129-1-3p	Upregulated	-0.28
KL	ENST00000380099.3	klotho	hsa-miR-129-1-3p	Upregulated	-0.28
SZRD1	ENST00000401089.3	SUZ RNA binding domain containing 1	hsa-miR-129-1-3p	Upregulated	-0.28
EFNA5	ENST00000333274.6	ephrin-A5	hsa-miR-129-1-3p	Upregulated	-0.28
HINT3	ENST00000229633.5	histidine triad nucleotide binding protein 3	hsa-miR-129-1-3p	Upregulated	-0.28
SLC39A9	ENST00000031146.4	solute carrier family 39, member 9	hsa-miR-9-5p	Upregulated	-0.28
ZDHHC20	ENST00000320220.9	zinc finger, DHHC-type containing 20	hsa-miR-9-5p	Upregulated	-0.28
FGF18	ENST00000274625.5	fibroblast growth factor 18	hsa-miR-9-5p	Upregulated	-0.28
ESYT1	ENST00000394048.5	extended synaptotagmin-like protein 1	hsa-miR-9-5p	Upregulated	-0.28
MYPN	ENST00000358913.5	myopalladin	hsa-miR-9-5p	Upregulated	-0.28
OTUD3	ENST00000375120.3	OTU domain containing 3	hsa-miR-9-5p	Upregulated	-0.28
ARID1A	ENST00000324856.7	AT rich interactive domain 1A (SWI-like)	hsa-miR-9-5p	Upregulated	-0.28
CCNI	ENST00000237654.4	cyclin I	hsa-miR-9-5p	Upregulated	-0.28
PDGFRB	ENST00000261799.4	platelet-derived growth factor receptor, beta polypeptide	hsa-miR-9-5p	Upregulated	-0.28
RNF128	ENST00000324342.3	ring finger protein 128, E3 ubiquitin protein ligase	hsa-miR-9-5p	Upregulated	-0.28
C3orf58	ENST00000441925.2	chromosome 3 open reading frame 58	hsa-miR-9-5p	Upregulated	-0.28
CCNE2	ENST00000520509.1	cyclin E2	hsa-miR-9-5p	Upregulated	-0.28
MAP2K7	ENST00000397981.3	mitogen-activated protein kinase kinase 7	hsa-miR-9-5p	Upregulated	-0.28
DHX40	ENST00000251241.4	DEAH (Asp-Glu-Ala-His) box polypeptide 40	hsa-miR-9-5p	Upregulated	-0.28
OTUD7B	ENST00000369135.4	OTU domain containing 7B	hsa-miR-9-5p	Upregulated	-0.28
CPEB4	ENST00000265085.5	cytoplasmic polyadenylation element binding protein 4	hsa-miR-9-5p	Upregulated	-0.28
ELOVL4	ENST00000369816.4	ELOVL fatty acid elongase 4	hsa-miR-9-5p	Upregulated	-0.28
KLHL42	ENST00000381271.2	kelch-like family member 42	hsa-miR-9-5p	Upregulated	-0.28
FAM117A	ENST00000240364.2	family with sequence similarity 117, member A	hsa-miR-9-5p	Upregulated	-0.28
ORAI2	ENST00000356387.2	ORAI calcium release-activated calcium modulator 2	hsa-miR-9-5p	Upregulated	-0.28
COLGALT2	ENST00000367521.1	collagen beta(1-O)galactosyltransferase 2	hsa-miR-9-5p	Upregulated	-0.28
KLF3	ENST00000261438.5	Kruppel-like factor 3 (basic)	hsa-miR-219a-5p	Upregulated	-0.28
THSD7B	ENST00000409968.1	thrombospondin, type I, domain containing 7B	hsa-miR-219a-5p	Upregulated	-0.28
MIER3	ENST00000381226.3	mesoderm induction early response 1, family member 3	hsa-miR-219a-5p	Upregulated	-0.28
FZD4	ENST00000531380.1	frizzled family receptor 4	hsa-miR-219a-5p	Upregulated	-0.28
CCSAP	ENST00000366687.1	centriole, cilia and spindle-associated protein	hsa-miR-219a-5p	Upregulated	-0.28
GSK3B	ENST00000264235.8	glycogen synthase kinase 3 beta	hsa-miR-219a-5p	Upregulated	-0.28
DDI2	ENST00000480945.1	DNA-damage inducible 1 homolog 2 (S. cerevisiae)	hsa-miR-199a-5p	Downregulated	-0.27
MAP4K3	ENST00000263881.3	mitogen-activated protein kinase kinase kinase kinase 3	hsa-miR-199a-5p	Downregulated	-0.27
SLC35B3	ENST00000379660.4	solute carrier family 35 (adenosine 3'-phospho 5'-phosphosulfate transporter), member B3	hsa-miR-199a-5p	Downregulated	-0.27
SULT4A1	ENST00000330884.4	sulfotransferase family 4A, member 1	hsa-miR-199b-5p	Downregulated	-0.27
TM9SF3	ENST00000371142.4	transmembrane 9 superfamily member 3	hsa-miR-199b-5p	Downregulated	-0.27
BCAP29	ENST00000005259.4	B-cell receptor-associated protein 29	hsa-miR-199b-5p	Downregulated	-0.27
CDKN1C	ENST00000414822.3	cyclin-dependent kinase inhibitor 1C (p57, Kip2)	hsa-miR-199a-5p	Downregulated	-0.27
KLHL23	ENST00000392647.2	kelch-like family member 23	hsa-miR-199a-5p	Downregulated	-0.27
ZSCAN29	ENST00000562072.1	zinc finger and SCAN domain containing 29	hsa-miR-199a-5p	Downregulated	-0.27
YWHAE	ENST00000264335.8	tyrosine 3-monooxygenase/tryptophan 5-monooxygenase activation protein, epsilon polypeptide	hsa-miR-199a-3p	Downregulated	-0.27
NUTF2	ENST00000219169.4	nuclear transport factor 2	hsa-miR-199a-3p	Downregulated	-0.27
PLAG1	ENST00000316981.3	pleiomorphic adenoma gene 1	hsa-miR-199a-3p	Downregulated	-0.27
PDS5A	ENST00000303538.8	PDS5, regulator of cohesion maintenance, homolog A (S. cerevisiae)	hsa-miR-199a-3p	Downregulated	-0.27
DNMT3A	ENST00000380746.4	DNA (cytosine-5-)-methyltransferase 3 alpha	hsa-miR-199a-3p	Downregulated	-0.27
IKZF4	ENST00000262032.5	IKAROS family zinc finger 4 (Eos)	hsa-miR-199a-3p	Downregulated	-0.27
WHAMM	ENST00000286760.4	WAS protein homolog associated with actin, golgi membranes and microtubules	hsa-miR-199a-3p	Downregulated	-0.27
ST6GAL2	ENST00000361686.4	ST6 beta-galactosamide alpha-2,6-sialyltranferase 2	hsa-miR-199a-3p	Downregulated	-0.27
ST8SIA4	ENST00000231461.5	ST8 alpha-N-acetyl-neuraminide alpha-2,8-sialyltransferase 4	hsa-miR-199a-3p	Downregulated	-0.27
IFFO2	ENST00000455833.2	intermediate filament family orphan 2	hsa-miR-199a-3p	Downregulated	-0.27
NACC1	ENST00000292431.4	nucleus accumbens associated 1, BEN and BTB (POZ) domain containing	hsa-miR-199a-3p	Downregulated	-0.27
KCTD16	ENST00000507359.3	potassium channel tetramerization domain containing 16	hsa-miR-199a-3p	Downregulated	-0.27
FBXO28	ENST00000424254.2	F-box protein 28	hsa-miR-199a-3p	Downregulated	-0.27
PHLPP2	ENST00000568954.1	PH domain and leucine rich repeat protein phosphatase 2	hsa-miR-199a-3p	Downregulated	-0.27
LIN54	ENST00000395282.2	lin-54 homolog (C. elegans)	hsa-miR-199a-3p	Downregulated	-0.27
RAB3D	ENST00000222120.3	RAB3D, member RAS oncogene family	hsa-miR-142-3p.1	Downregulated	-0.27
CCDC6	ENST00000263102.6	coiled-coil domain containing 6	hsa-miR-142-3p.1	Downregulated	-0.27
PARD6B	ENST00000371610.2	par-6 family cell polarity regulator beta	hsa-miR-142-3p.1	Downregulated	-0.27
STAM2	ENST00000263904.4	signal transducing adaptor molecule (SH3 domain and ITAM motif) 2	hsa-miR-142-3p.1	Downregulated	-0.27
WHSC1L1	ENST00000317025.8	Wolf-Hirschhorn syndrome candidate 1-like 1	hsa-miR-142-3p.1	Downregulated	-0.27
PIK3CG	ENST00000359195.3	phosphatidylinositol-4,5-bisphosphate 3-kinase, catalytic subunit gamma	hsa-miR-142-3p.1	Downregulated	-0.27
RAB12	ENST00000329286.6	RAB12, member RAS oncogene family	hsa-miR-142-3p.1	Downregulated	-0.27
CELF2	ENST00000379261.4	CUGBP, Elav-like family member 2	hsa-miR-142-3p.1	Downregulated	-0.27
LRP1B	ENST00000389484.3	low density lipoprotein receptor-related protein 1B	hsa-miR-142-3p.1	Downregulated	-0.27
PPP3CA	ENST00000512215.1	protein phosphatase 3, catalytic subunit, alpha isozyme	hsa-miR-142-3p.1	Downregulated	-0.27
TPM4	ENST00000300933.4	tropomyosin 4	hsa-miR-142-3p.1	Downregulated	-0.27
GPCPD1	ENST00000379019.4	glycerophosphocholine phosphodiesterase GDE1 homolog (S. cerevisiae)	hsa-miR-142-3p.1	Downregulated	-0.27
DAPK1	ENST00000469640.2	death-associated protein kinase 1	hsa-miR-124-3p.1	Upregulated	-0.27
KIF26A	ENST00000315264.7	kinesin family member 26A	hsa-miR-124-3p.1	Upregulated	-0.27
SRGAP1	ENST00000355086.3	SLIT-ROBO Rho GTPase activating protein 1	hsa-miR-124-3p.1	Upregulated	-0.27
MOB1B	ENST00000309395.2	MOB kinase activator 1B	hsa-miR-124-3p.1	Upregulated	-0.27
CDK4	ENST00000312990.6	cyclin-dependent kinase 4	hsa-miR-124-3p.1	Upregulated	-0.27
SERTAD3	ENST00000392028.4	SERTA domain containing 3	hsa-miR-124-3p.1	Upregulated	-0.27
KCNA1	ENST00000382545.3	potassium voltage-gated channel, shaker-related subfamily, member 1 (episodic ataxia with myokymia)	hsa-miR-124-3p.1	Upregulated	-0.27
SNCAIP	ENST00000261368.8	synuclein, alpha interacting protein	hsa-miR-124-3p.1	Upregulated	-0.27
TFAP4	ENST00000204517.6	transcription factor AP-4 (activating enhancer binding protein 4)	hsa-miR-124-3p.1	Upregulated	-0.27
UBR2	ENST00000372883.3	ubiquitin protein ligase E3 component n-recognin 2	hsa-miR-124-3p.1	Upregulated	-0.27
PLEC	ENST00000345136.3	plectin	hsa-miR-124-3p.1	Upregulated	-0.27
NFIC	ENST00000346156.5	nuclear factor I/C (CCAAT-binding transcription factor)	hsa-miR-124-3p.1	Upregulated	-0.27
UBE2G2	ENST00000345496.2	ubiquitin-conjugating enzyme E2G 2	hsa-miR-124-3p.1	Upregulated	-0.27
PHIP	ENST00000275034.4	pleckstrin homology domain interacting protein	hsa-miR-124-3p.1	Upregulated	-0.27
PRPF38B	ENST00000370025.4	pre-mRNA processing factor 38B	hsa-miR-124-3p.1	Upregulated	-0.27
[truncated: 4,029 more rows]
