# Supplementary material for: Matched Analyses of Brain Metastases versus Primary Non-Small Cell Lung Cancer Reveal a Unique microRNA Signature
Source: Int J Mol Sci. 2022 Dec 22;24(1):193. doi: 10.3390/ijms24010193 (PMC9820685; doi:10.3390/ijms24010193)
Supplement: Supplementary file 1 [file ijms-24-00193-s001.zip › Table S4.xlsx]

## Sheet: IPG_rep49455_c62949_goTable.csv
pName	countDE	countAll	p_fdr
MicroRNAs in cancer	83	163	6.13648e-15
Pathways in cancer	190	518	8.18876e-15
Axon guidance	85	179	1.84177e-13
Regulation of actin cytoskeleton	96	215	3.01498e-13
MAPK signaling pathway	116	286	1.66588e-12
Endocytosis	102	244	5.23534e-12
Signaling pathways regulating pluripotency of stem cells	67	138	2.01335e-11
Focal adhesion	85	197	5.68449e-11
Proteoglycans in cancer	85	198	7.05284e-11
PI3K-Akt signaling pathway	123	343	2.76229e-09
Human papillomavirus infection	116	321	5.01814e-09
Yersinia infection	61	135	5.13776e-09
Gastric cancer	64	145	5.83066e-09
Sphingolipid signaling pathway	54	117	1.64011e-08
Neurotrophin signaling pathway	54	117	1.64011e-08
Adherens junction	38	70	1.64011e-08
Rap1 signaling pathway	81	206	2.09413e-08
Cellular senescence	65	155	4.10911e-08
EGFR tyrosine kinase inhibitor resistance	40	78	4.6432e-08
Hepatocellular carcinoma	66	159	4.6432e-08
ErbB signaling pathway	42	84	4.68459e-08
Ras signaling pathway	84	221	5.52765e-08
Bacterial invasion of epithelial cells	39	77	9.73553e-08
Endocrine resistance	45	95	1.00966e-07
TGF-beta signaling pathway	43	91	2.22567e-07
Colorectal cancer	41	85	2.22567e-07
Parathyroid hormone synthesis, secretion and action	47	104	2.64257e-07
Renal cell carcinoma	35	68	2.67634e-07
Prolactin signaling pathway	35	69	3.83047e-07
Hippo signaling pathway	61	151	3.83047e-07
mTOR signaling pathway	61	151	3.83047e-07
Growth hormone synthesis, secretion and action	51	118	3.83047e-07
Chronic myeloid leukemia	37	76	6.18268e-07
Apelin signaling pathway	55	133	6.3431e-07
Thyroid hormone signaling pathway	51	121	8.81026e-07
Prostate cancer	43	97	1.54391e-06
Arrhythmogenic right ventricular cardiomyopathy	36	76	1.98972e-06
Phospholipase D signaling pathway	57	145	2.61362e-06
Hepatitis B	61	159	2.73744e-06
cGMP-PKG signaling pathway	62	164	3.92376e-06
Shigellosis	82	236	4.16361e-06
Relaxin signaling pathway	51	127	4.52919e-06
Tight junction	61	162	5.28442e-06
Pancreatic cancer	35	76	5.65431e-06
Cushing syndrome	58	152	5.65431e-06
Human cytomegalovirus infection	76	217	6.58645e-06
Transcriptional misregulation in cancer	65	179	9.10909e-06
cAMP signaling pathway	73	208	9.20572e-06
Choline metabolism in cancer	40	96	1.97303e-05
Insulin signaling pathway	51	135	3.03942e-05
