# Supplementary material for: Matched Analyses of Brain Metastases versus Primary Non-Small Cell Lung Cancer Reveal a Unique microRNA Signature
Source: Int J Mol Sci. 2022 Dec 22;24(1):193. doi: 10.3390/ijms24010193 (PMC9820685; doi:10.3390/ijms24010193)
Supplement: Supplementary file 1 [file ijms-24-00193-s001.zip › Table S5.xlsx]

## Sheet: Sheet1
Gene	miRNA	Publication
AGO1	miR-9-5p	ARR Forrest et al. 2010
AGO1	miR-124-3p	Karginov FV et al. 2013
AGO1	miR-129-2-3p	Karginov FV et al. 2013
AGO1	miR-129-2-3p	Jingli Cao et al. 2012
CLIP1	miR-124-3p	Xue Y et al. 2013
DYNC1LI2	miR-124-3p	Hendrickson David G et al. 2009
EP300	miR-9-5p	Grimson A et al. 2007
FBXO21	miR-9-5p	Karginov FV et al. 2013
FBXO21	miR-124-3p	Wang Xiaowei et al. 2006
FBXW11	miR-9-5p	Karginov FV et al. 2013; Kameswaran V et al. 2014
FBXW11	miR-124-3p	Hendrickson David G et al. 2009
MEF2C	miR-9-5p	Boudreau RL et al. 2014
MEF2C	miR-124-3p	Hendrickson David G et al. 2009
MEF2C	miR-129-2-3p	Jingli Cao et al. 2012
PPP2R5E	miR-124-3p	Wang Xiaowei et al. 2006
RAC1	miR-124-3p	Shuo Geng et al. 2014; Wang Xiaowei et al. 2006
RANBP2	miR-9-5p	Boudreau RL et al. 2014
TAOK1	miR-9-5p	Boudreau RL et al. 2014; Eva Gottwein et al. 2011; Hafner M et al. 2010; Kishore S et al. 2011; Skalsky Rebecca L et al. 2012; Whisnant Adam W et al. 2013
TAOK1	miR-124-3p	Boudreau RL et al. 2014
TP53	miR-9-5p	Haecker Irina et al. 2012
XPO1	miR-9-5p	Haecker Irina et al. 2012; Karginov FV et al. 2013
XPO1	miR-124-3p	Wang Xiaowei et al. 2006
