# Supplementary figures and images for: Matched Analyses of Brain Metastases versus Primary Non-Small Cell Lung Cancer Reveal a Unique microRNA Signature
Source: MDPI journal article supplement (doi:10.3390/ijms24010193), 2022-12-22

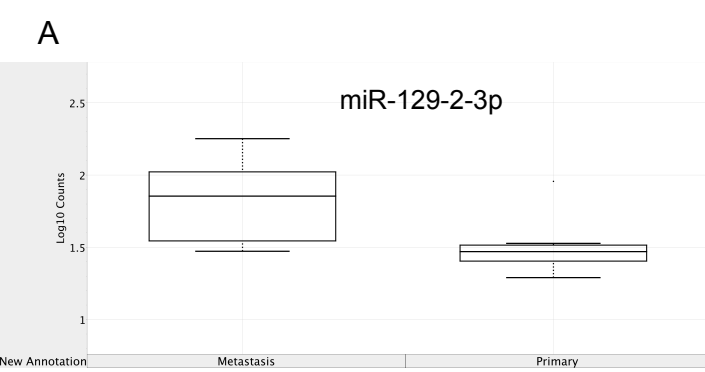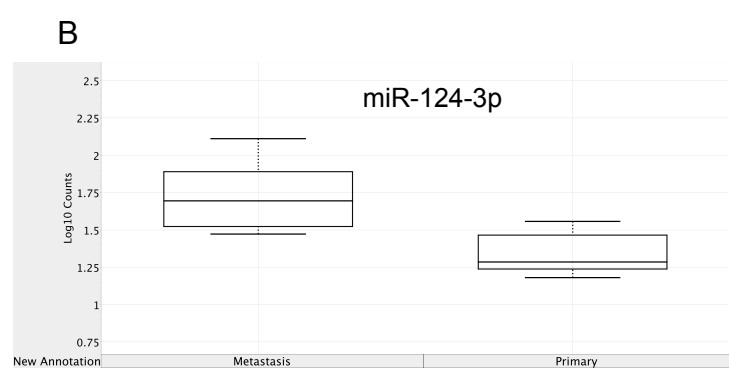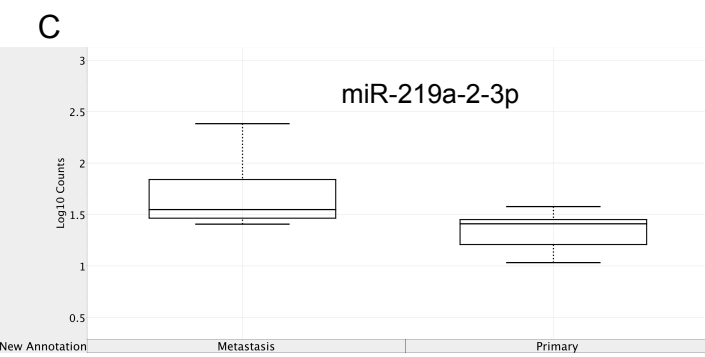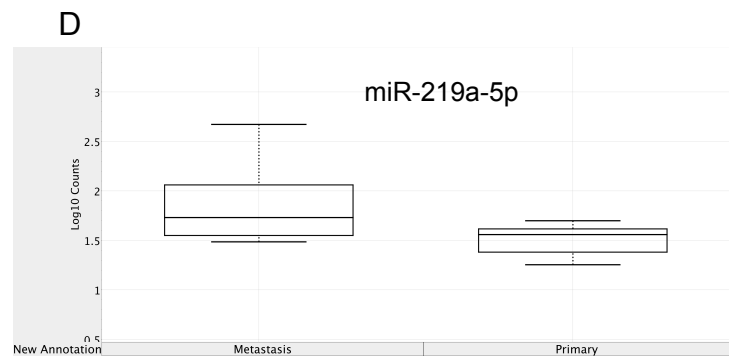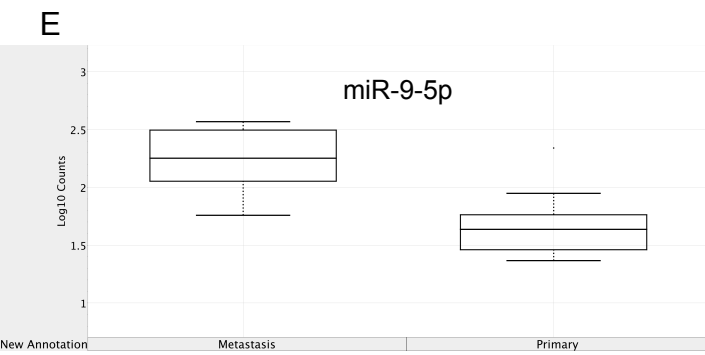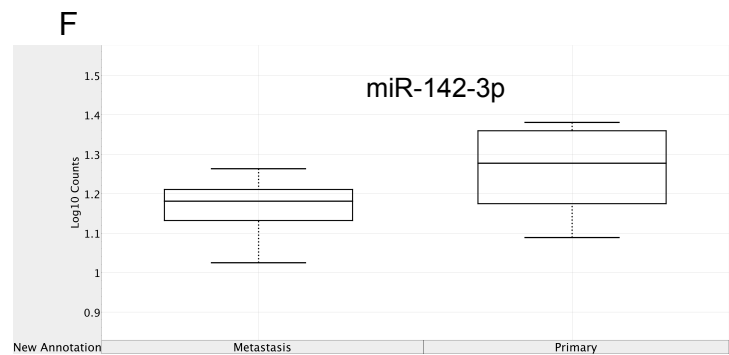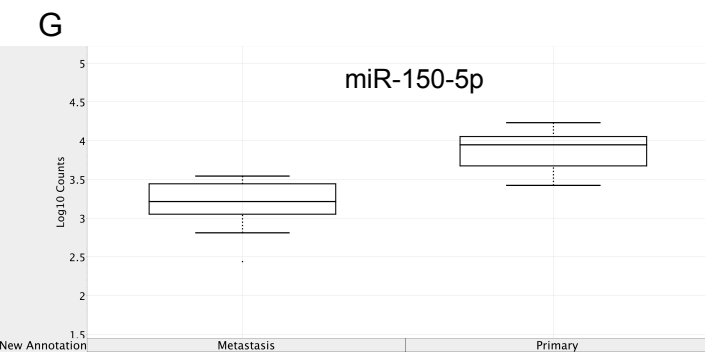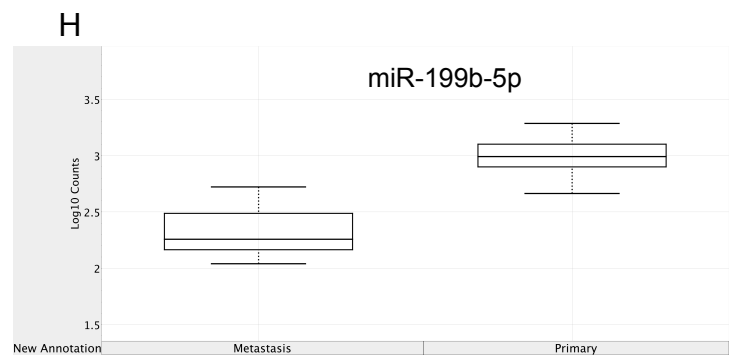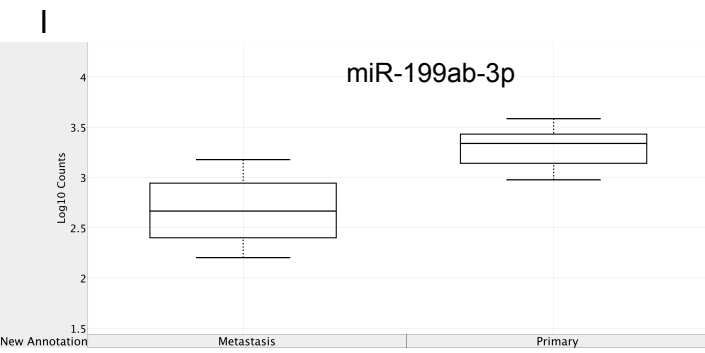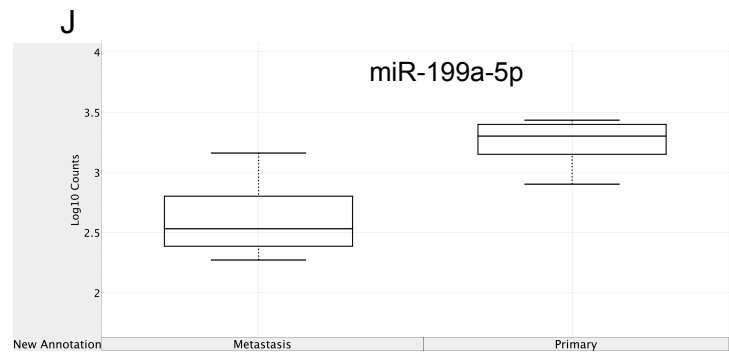

Supplement: s1 [file s1]
